# Supplementary material for: Thermally stable C2-symmetric α-diimine nickel precatalysts for ethylene polymerization: semicrystalline to amorphous PE with high tensile and elastic properties
Source: Royal Society of Chemistry journal article supplement (doi:10.1039/d4dt02543a), 2024-01-01
Supplement: d4dt02543a1.pdf [file d4dt02543a1.pdf]

## Thermally stable C<sub>2</sub>-Symmetric $\alpha$ -Diimine Nickel Precatalysts for ethylene polymerization: semicrystalline to amorphous PE with high tensile and elastic properties

Xiaoxu Li,<sup>a,†</sup> Zexu Hu,<sup>a,†</sup> Qaiser Mahmood,<sup>a,\*</sup> Yizhou Wang,<sup>b</sup> Sunny Sohail,<sup>a,b</sup> Song Zou,<sup>b</sup> Tongling Liang,<sup>b</sup> Wen-Hua Sun<sup>a,b,\*</sup>

<sup>a</sup>Chemistry and Chemical Engineering Guangdong Laboratory, Shantou, 515031, China.

<sup>b</sup>Key Laboratory of Engineering Plastics, Institute of Chemistry, Chinese Academy of Sciences, Beijing, 100190.

<sup>†</sup>These authors equally contributed.

\*Corresponding authors; Email address: qaiser@cclab.com.cn (Q. Mahmood); whsun@iccas.ac.cn (W.-H. Sun)

### Contents

|    |                                                                                                                |
|----|----------------------------------------------------------------------------------------------------------------|
| 1  | General conditions                                                                                             |
| 2  | Synthesis of imino-ketone and L-iPr <sub>3</sub> ligand                                                        |
| 3  | X-ray crystallographic studies                                                                                 |
| 4  | Crystal data and structural refinements for complexes                                                          |
| 5  | Typical procedure for ethylene polymerization                                                                  |
| 6  | <sup>1</sup> H and <sup>13</sup> C spectra of organic compounds                                                |
| 7  | <sup>1</sup> H NMR spectra of obtained polyethylene using different nickel complexes at different temperatures |
| 8  | <sup>13</sup> C NMR spectrum of polyethylene obtained at 40 °C temperature using NiBr-iPr                      |
| 9  | GPC curves of obtained polyethylene using NiBr-iPr at different temperatures                                   |
| 10 | DSC curves of obtained polyethylene using different nickel complexes at different temperatures                 |
| 11 | Wide-angle X-ray diffraction (WAXD) spectra of the polyethylene                                                |
| 12 | ESI-MS spectra of ligands, and their nickel complexes                                                          |
| 13 | References                                                                                                     |

## 1. General conditions

All manipulations involving air and/or moisture sensitive compounds were performed under an atmosphere of nitrogen using standard Schlenk techniques. Methylaluminoxane (MAO, 1.67 M in toluene) and modified methylaluminoxane (MMAO, 1.93 M in heptane) were purchased from Anhui Botai Electronic Materials Co. Dimethylaluminum chloride ( $\text{Me}_2\text{AlCl}$ , 0.9 M in heptane) and diethylaluminum chloride ( $\text{Et}_2\text{AlCl}$ , 2.0 M in hexane) were supplied from Shanghai Macklin Biochemical Co., Ltd. High-purity ethylene was purchased from Guangdong Jieyang Petrochemical Company and used as received. Acenaphthylene-1,2-dione was bought from Macklin with 98% purity. The common aniline 2,6- $i\text{Pr}_2\text{C}_6\text{H}_3$  were obtained from, Heowns and Macklin with 98% purity.  $\text{ZnCl}_2$  used as catalyst during the synthesis of bulky aniline was obtained from Macklin with 98% purity.  $(\text{DME})\text{NiBr}_2$  with 97% purity was obtained from Leyan. *p*-Toluenesulfonic acid monohydrate used as catalysts during synthesis of ligands was obtained from Dingjiuding Chemicals with 98% purity. Toluene was obtained from Xihua, with purity  $\geq 99.5$  with  $\text{H}_2\text{O}\% \leq 0.03\%$  which was distilled over sodium before use. Other reagents were purchased from Aldrich, Acros or local suppliers. The Bulk aniline was prepared using the literature route [1].  $^1\text{H}$  and  $^{13}\text{C}$  NMR spectroscopic measurements for the organic compounds were performed using a Bruker AVANCE III 600WB spectrometer at 599.92 MHz with 1024 and 16 scans respectively. Operating conditions used for  $^1\text{H}$  and  $^{13}\text{C}$  spectra: spectral width 15.0 kHz; acquisition time 2.1845 s; relaxation delay 2.0 s. Chemical shifts are measured in ppm for the  $^1\text{H}$  and  $^{13}\text{C}$  NMR spectra and are relative to TMS as an internal standard. Elemental analyses were conducted on a Flash EA 1112 microanalyzer. FT-IR spectra were carried out using a PerkinElmer System 2000 FT-IR spectrometer. The sample is grinded with KBr to prepare a homogeneous KBr pellet for scanning. The concentration of the sample in KBr was maintained in the range of 0.2% to 1%. The frequency ranges were measured as wave numbers typically over the range  $4000\text{--}400\text{ cm}^{-1}$  using, OMNIC software. Molecular weights ( $M_w$ ) and molecular weight distributions ( $D$ ) of the polyethylenes were determined using a PL-GPC220 instrument at  $150\text{ }^\circ\text{C}$  with 1,2,4-trichlorobenzene as the solvent. The flow rate of TCB was kept at 1.00 ml/min with injection volume 200.0  $\mu\text{l}$  and column length was settled at 650 mm. The columns used has specifications  $2 \times \text{PLgel MIXED-B } 10\mu\text{m } 300 \times 7.5\text{ mm}$ . Sample concentration was kept at 0.1 mg/ml. Narrow standards for calibration were used. The melting

temperatures of the polyethylenes were measured from the second scanning run on a PerkinElmer TA-Q2000 DSC analyzer under a nitrogen atmosphere. In the procedure, a sample of about 4.0–6.0 mg was heated to 150 °C at a heating rate of 20 °C min<sup>-1</sup> and kept for 5 min at 150 °C to remove the thermal history and then cooled at a rate of 20 °C min<sup>-1</sup> to 25 °C. The <sup>1</sup>H NMR spectra of the polyethylenes were recorded on a Bruker DMX 300 MHz instrument at 110 °C and <sup>13</sup>C at 110 °C in deuterated tetrachloroethane with TMS as an internal standard and peaks were integrated using deconvolution method. Operating conditions used for <sup>1</sup>H spectra: spectral width 15 kHz; acquisition time 2.1889 s; relaxation delay 2.0 s. Operating conditions used for <sup>13</sup>C spectra: spectral frequency 125.70 MHz; pulse width 10.0 Ms; spectral width 21.3675 kHz; acquisition time 0.7668 s; relaxation delay 5.0 s; number of scans 2048. The chemical shift values ( $\delta$ ) are reported in parts per million (ppm). The stress–strain curves were obtained using a universal tester (Instron 1122, UK). To make sure the results are consistent, every sample is test five times for fracture test. [Sample size: width 5 mm, thickness 1 mm, length 30 mm, shape: rectangle]. Twice for cyclic tensile test. [Sample size: width 2.5 mm, thickness 1 mm, length 15 mm, shape: rectangle] In the fracture test, the program is set to a constant speed of 50mm/min, and in the cyclic tensile test, the constant speed of 50mm/min is continued, and the cycle is carried out when the strain reaches 300%. The electrospray (ESI) mass spectra for the complexes and the high resolution mass spectra for all new organic compounds were measured using Bruker 9.4 T Solarix (FT-ICR-MS) instrument.

## **2. Synthesis of imino-ketone and L-iPr<sub>3</sub> ligand**

**Synthesis of imino-ketone:** To a solution of acenaphthenequinone (1.01 g, 5.56 mmol) in ethanol (100 mL), a solution of 2,4-bis(bis(4-fluorophenyl)methyl)-6-isopropylaniline (3.0 g, 5.56 mmol) in dichloromethane (100 mL) was added, followed by para-toluenesulfonic acid (0.19 g, 1.11 mmol, 20%) as a catalyst was added. After 24 h of stirring at room temperature, volatiles were removed under vacuum, and the residue was purified by alumina column chromatography using petroleum ether/ethyl acetate/triethylamine (500:40:3), affording the red crystalline imino-ketone (1.71 g, 43%). The product was used in the next step without further analysis.

**Synthesis of L-iPr<sub>3</sub>:** To a solution of imino-ketone (1.71 g, 2.43 mmol) and p-toluenesulfonic acid (20 mol%) in dry toluene (100 mL) was added dropwise 2,6-diisopropylaniline (0.29 g, 2.43 mmol) and the reaction mixture stirred and heated to

reflux for 12 h using a Dean-Stark trap. After cooling to room temperature, the solvent was removed under reduced pressure. The residue was purified by alumina column chromatography using petroleum ether/ethyl acetate/triethylamine (500:10:3) as the eluent affording **L-iPr<sub>3</sub>** as a deep yellow crystalline solid (0.58 g, 30%). <sup>1</sup>H NMR (600 MHz, Chloroform-*d*) δ 7.81 (d, *J* = 8.2 Hz, 1H), 7.78 (d, *J* = 8.2 Hz, 1H), 7.33 – 7.29 (m, 2H), 7.12 (t, *J* = 7.7 Hz, 1H), 7.09 – 6.96 (m, 9H), 6.90 (dd, *J* = 8.6, 5.4 Hz, 2H), 6.85 (t, *J* = 8.6 Hz, 2H), 6.78 (dd, *J* = 8.3, 5.3 Hz, 2H), 6.54 (d, *J* = 7.2 Hz, 1H), 6.49 (d, *J* = 1.9 Hz, 1H), 6.20 (d, *J* = 7.2 Hz, 1H), 6.16 (t, *J* = 8.5 Hz, 2H), 5.67 (s, 1H), 5.51 (s, 1H), 3.24 – 3.13 (m, 1H), 2.87 (dq, *J* = 13.7, 6.8 Hz, 2H), 1.31 (d, *J* = 6.8 Hz, 4H), 1.19 (d, *J* = 6.8 Hz, 3H), 1.14 (d, *J* = 6.8 Hz, 3H), 1.09 (d, *J* = 6.9 Hz, 3H), 0.91 (d, *J* = 6.7 Hz, 4H). <sup>13</sup>C NMR (151 MHz, Chloroform-*d*) δ 162.94, 162.61, 160.99, 147.51, 147.14, 140.68, 140.19, 136.13, 135.80, 135.61, 131.48, 131.43, 131.01, 130.95, 130.90, 130.86, 129.36, 129.16, 128.78, 128.00, 127.25, 125.42, 124.88, 124.00, 123.84, 123.57, 115.52, 115.50, 115.38, 115.36, 115.10, 114.96, 114.90, 114.76, 55.30, 51.26, 29.04, 29.00, 28.69, 24.59, 23.97, 23.59, 23.38, 23.23, 22.87. FTIR (KBr, cm<sup>-1</sup>): 744 (w), 787 (m), 834 (s), 925 (w), 1015 (w), 1094 (w), 1157 (m), 1225 (s), 1434 (w), 1457 (w), 1506 (s), 1599 (m), 1650 (m), 1676 (ν(C=N), w), 3053 (w). Anal. Calcd. for C<sub>59</sub>H<sub>50</sub>F<sub>4</sub>N<sub>2</sub> (863.06): C, 82.11; H, 5.84; N, 3.25. Found: C, 81.66; H, 6.00; N, 2.97. MS-ESI (*m/z*): calcd. for [(C<sub>59</sub>H<sub>50</sub>F<sub>4</sub>N<sub>2</sub>)+H]<sup>+</sup>: 863.39829, found: 863.39870.

**Synthesis of NiBr-iPr<sub>3</sub>**: To a solution of **L-iPr<sub>3</sub>** (0.3 g, 0.34 mmol) in dichloromethane (10 mL) was added (DME)NiBr<sub>2</sub> (0.099 g, 0.32 mmol) under a nitrogen atmosphere. The reaction mixture was stirred for 24 h at ambient temperature. The most of the solvent was removed under reduced pressure and excess diethyl ether was added to precipitate the product. The product was collected by filtration, washed with diethyl ether (3 × 5 mL) and then dried under reduced pressure to give **NiBr-iPr<sub>3</sub>** as a deep red solid (0.31 g, 85%). FTIR (KBr, cm<sup>-1</sup>): 708 (w), 779 (m), 833 (s), 935 (w), 1016 (w), 1098 (w), 1158 (m), 1224 (s), 1435 (w), 1463 (w), 1507 (s), 1601 (m), 1620 (ν(C=N), w), 3064 (w). Anal. Calcd. for C<sub>59</sub>H<sub>50</sub>Br<sub>2</sub>F<sub>4</sub>N<sub>2</sub>Ni (1081.56): C, 65.52; H, 4.66; N, 2.59. Found: C, 64.29; H, 4.86; N, 2.32. MS-ESI (*m/z*): calcd. for [(C<sub>59</sub>H<sub>50</sub>F<sub>4</sub>N<sub>2</sub>)NiBr+CH<sub>2</sub>Cl<sub>2</sub>]<sup>+</sup>: 1083.19750, found: 1083.29501.

### 3. X-ray crystallographic studies

The single-crystal X-ray diffraction analysis of **NiBr-iPr** and **NiBr-Cl** complexes were conducted using a Rigaku Sealed Tube CCD (Saturn 724+) diffractometer,

Japan. The diffractometer employed graphite-monochromated Cu-K $\alpha$  radiation with a wavelength ( $\lambda$ ) of 0.71073 Å. The measurements were performed at a temperature of 170 ( $\pm$ 10) K. The cell parameters were determined by globally refining the positions of all collected reflections. The intensities obtained from the X-ray diffraction analysis were corrected for Lorentz and polymerization effects; an empirical absorption correction was carried out as well. The structures of complexes **NiBr-iPr** and **NiBr-Cl** were identified via direct methods and further refined via full-matrix least squares fitting on F2. The non-hydrogen atoms in each complex were refined anisotropically. The positions of all hydrogen atoms were determined based on calculated positions. The structural solution and refinement for each complex were carried out using SHELXT (Sheldrick) software.[2] The crystal data and processing parameters for **NiBr-iPr** and **NiBr-Cl** are presented in Table S1.

#### 4. Crystal data and structural refinements for complexes

**Table S1.** Crystal data and structural refinements for **NiBr-iPr**, and **NiBr-Cl**

|                               | <b>NiBr-iPr</b>                                                                  | <b>NiBr-Cl</b>                                                                                   |
|-------------------------------|----------------------------------------------------------------------------------|--------------------------------------------------------------------------------------------------|
| CCDC numbers                  | 2378621                                                                          | 2378622                                                                                          |
| Bond precision                | C-C = 0.0028 Å                                                                   | C-C = 0.0065 Å                                                                                   |
|                               | Wavelength = 1.54184                                                             | Wavelength = 0.71073                                                                             |
| Empirical formula             | C <sub>86</sub> H <sub>64</sub> Br <sub>2</sub> F <sub>8</sub> N <sub>2</sub> Ni | C <sub>82</sub> H <sub>59</sub> Br <sub>2</sub> Cl <sub>2</sub> F <sub>9</sub> N <sub>4</sub> Ni |
| Formula weight                | 1495.967                                                                         | 1560.76                                                                                          |
| Temperature/K                 | 169.99(10)                                                                       | 170.00(10)                                                                                       |
| Crystal system                | monoclinic                                                                       | monoclinic                                                                                       |
| Space group                   | P2 <sub>1</sub> /c                                                               | P2 <sub>1</sub> /n                                                                               |
| a/Å                           | 18.0709(1)                                                                       | 16.2292(9)                                                                                       |
| b/Å                           | 19.9898(2)                                                                       | 21.7914(10)                                                                                      |
| c/Å                           | 20.4029(1)                                                                       | 20.6488(9)                                                                                       |
| $\alpha$ /°                   | 90                                                                               | 90                                                                                               |
| $\beta$ /°                    | 97.382(1)                                                                        | 110.249(5)                                                                                       |
| $\gamma$ /°                   | 90                                                                               | 90                                                                                               |
| Volume/Å <sup>3</sup>         | 7309.13(9)                                                                       | 6851.3(6)                                                                                        |
| Z                             | 4                                                                                | 4                                                                                                |
| $\rho$ calc/g/cm <sup>3</sup> | 1.359                                                                            | 1.513                                                                                            |
| $\mu$ /mm <sup>-1</sup>       | 2.214                                                                            | 1.602                                                                                            |

|                                           |                                                               |                                                               |
|-------------------------------------------|---------------------------------------------------------------|---------------------------------------------------------------|
| F(000)                                    | 3048.2                                                        | 3168.0                                                        |
| F000'                                     | 2934.70                                                       | 2881.52                                                       |
| Crystal size/mm <sup>3</sup>              | 0.3 × 0.25 × 0.1                                              | 0.3 × 0.25 × 0.18                                             |
| Radiation                                 | Cu K α (λ = 1.54184)                                          | Mo K α (λ = 0.71073)                                          |
| θ range                                   | 4.94 to 154.86                                                | 3.264 to 62.154                                               |
| h,k,lmax                                  | 22,25,25                                                      | 23,30,29                                                      |
| Index ranges                              | -22 ≤ h ≤ 22, -25 ≤ k ≤ 24, -22 ≤ l ≤ 25                      | -19 ≤ h ≤ 23, -23 ≤ k ≤ 30, -29 ≤ l ≤ 28                      |
| Reflections collected                     | 56972                                                         | 65997                                                         |
| Independent reflections                   | 14872[R <sub>int</sub> = 0.0341, R <sub>sigma</sub> = 0.0306] | 18600[R <sub>int</sub> = 0.0399, R <sub>sigma</sub> = 0.0516] |
| Data/restraints/parameters                | 14872/0/861                                                   | 18600/0/820                                                   |
| Goodness-of-fit on F <sup>2</sup>         | 1.026                                                         | 1.044                                                         |
| Data completeness                         | 0.958                                                         | -                                                             |
| Theta(max)                                | 77.430                                                        | 31.077                                                        |
| Final R indexes [I >= 2 σ (I)]            | R <sub>1</sub> = 0.0353, wR <sub>2</sub> = 0.0972             | R <sub>1</sub> = 0.0815, wR <sub>2</sub> = 0.2560             |
| Final R indexes [all data]                | R <sub>1</sub> = 0.0393, wR <sub>2</sub> = 0.1000             | R <sub>1</sub> = 0.1137, wR <sub>2</sub> = 0.2749             |
| Largest diff. peak/hole/e Å <sup>-3</sup> | 0.34/-0.52                                                    | 1.93/-1.56                                                    |
| S                                         | 1.026                                                         | 1.044                                                         |
| Npar                                      | 861                                                           | 820                                                           |

## 5. Typical procedure for ethylene polymerization

The polymerization process at 1MPa ethylene pressure was conducted in a 250 mL stainless steel autoclave equipped with an ethylene pressure control system, a mechanical stirrer, and a temperature controller. Initially, the autoclave was dried, then purged twice with nitrogen and once with ethylene under reduced pressure to ensure an inert environment. Then, the complex (2.0 μmol) was dissolved in 30 mL of toluene and injected into the autoclave at the required reaction temperature. An additional 30 mL of toluene was added for washing purposes. Next, the appropriate amount of co-catalyst (MAO, MMAO, Me<sub>2</sub>AlCl, Et<sub>2</sub>AlCl) and more toluene were added successively to reach a total volume of 100 mL. The autoclave was



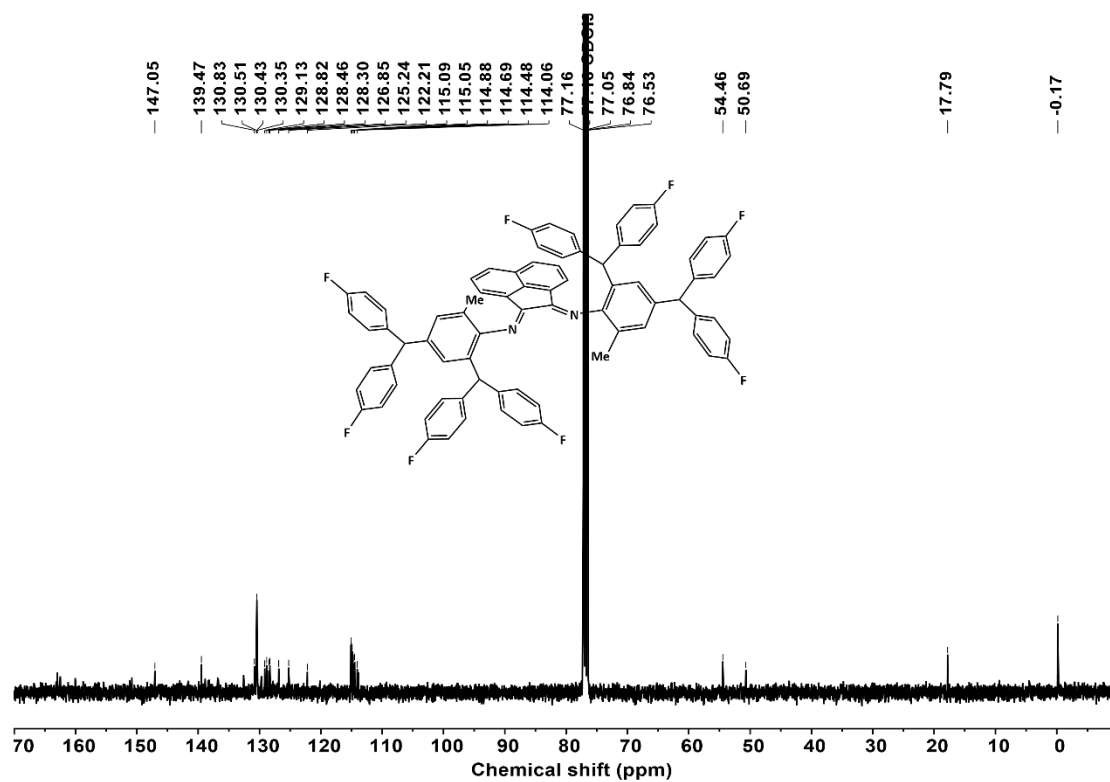

Figure S2.  $^{13}\text{C}$  NMR spectrum (in  $\text{CDCl}_3$ ) of NiBr-Me.

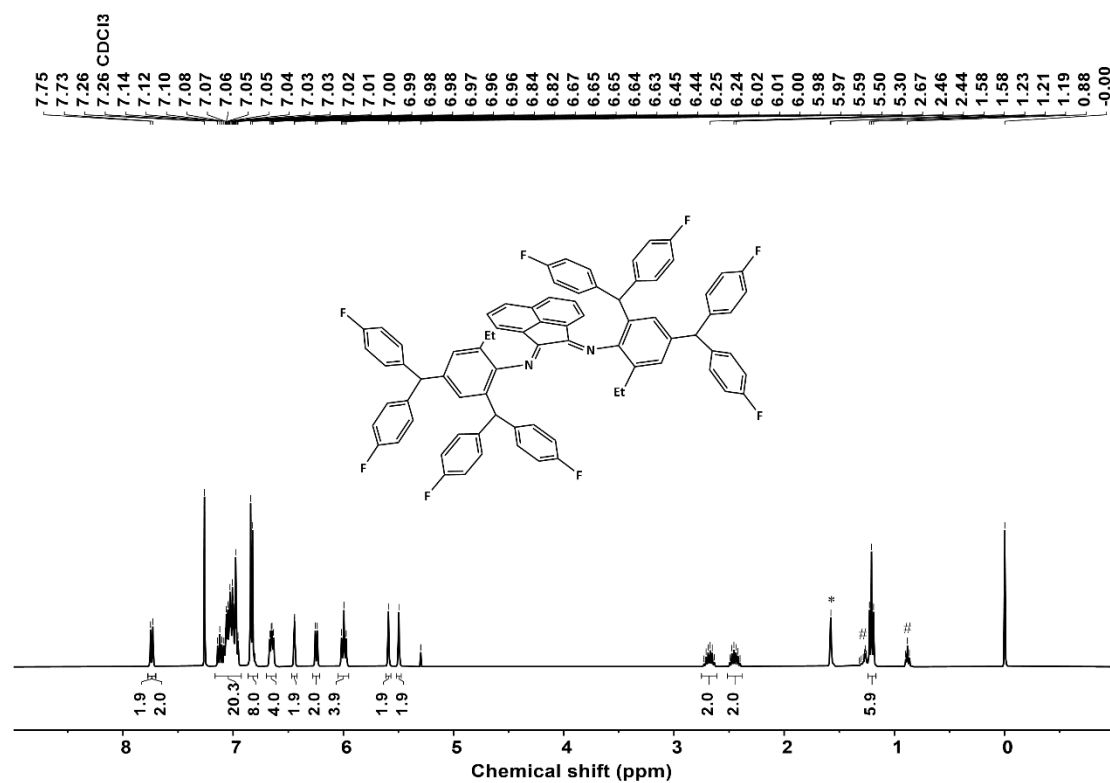

Figure S3.  $^1\text{H}$  NMR spectrum (in  $\text{CDCl}_3$ ) of NiBr-Et [\* water and # hexane].



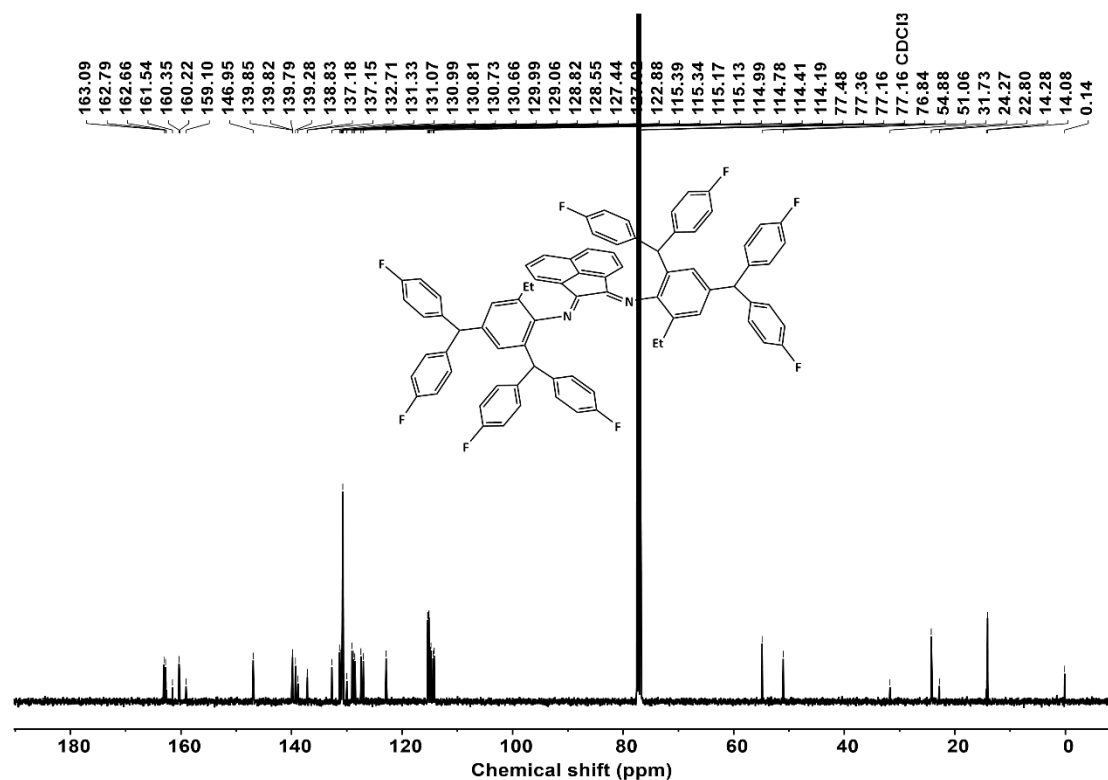

Figure S4. <sup>13</sup>C NMR spectrum (in CDCl<sub>3</sub>) of NiBr-Et.

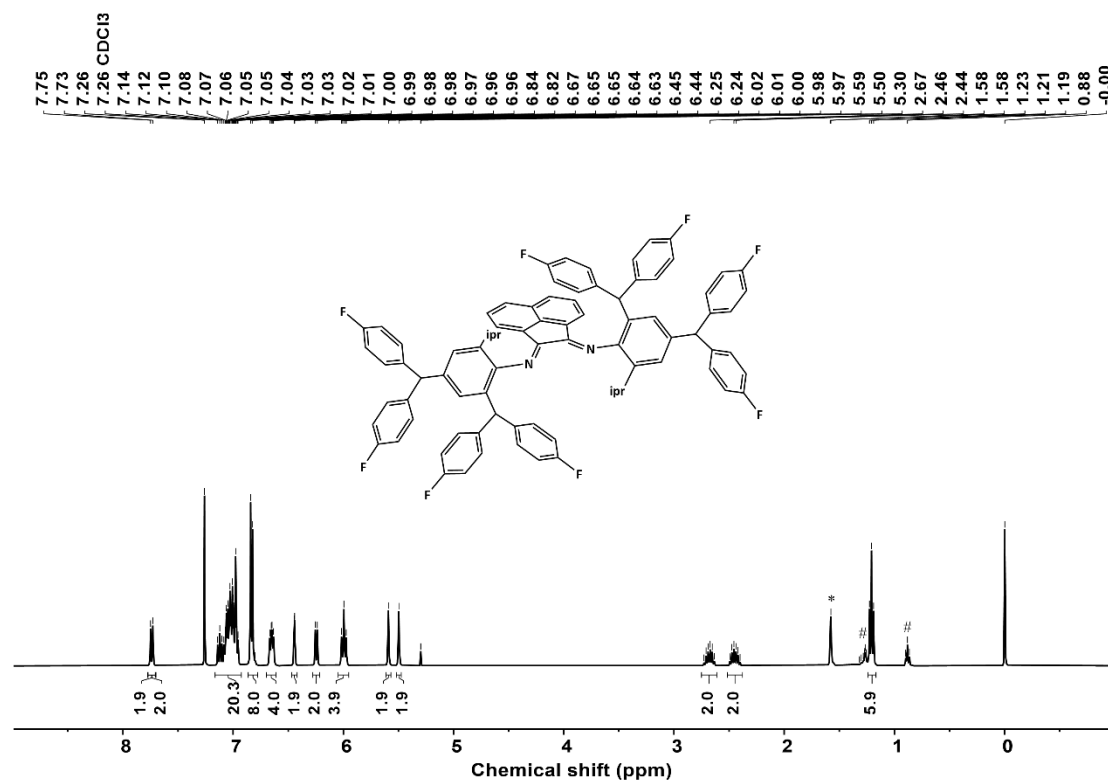

Figure S5. <sup>1</sup>H NMR spectrum (in CDCl<sub>3</sub>) of NiBr-iPr [\* water and # hexane].

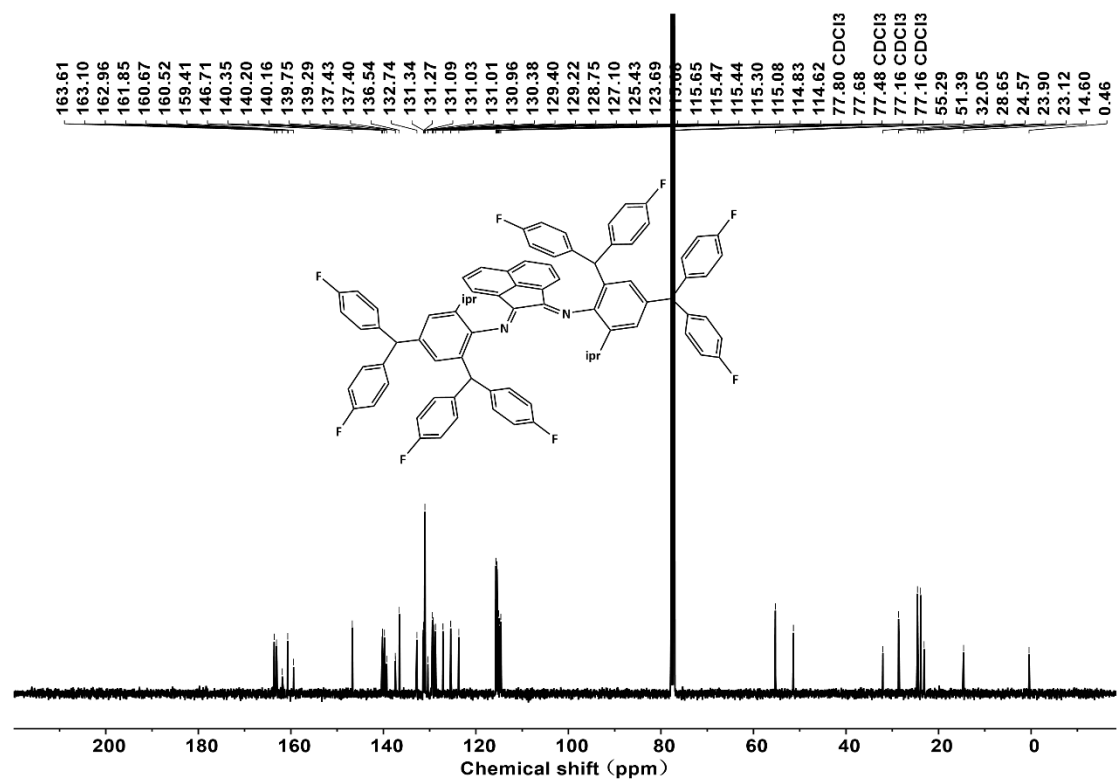

Figure S6.  $^{13}\text{C}$  NMR spectrum (in  $\text{CDCl}_3$ ) of  $\text{NiBr-iPr}$ .

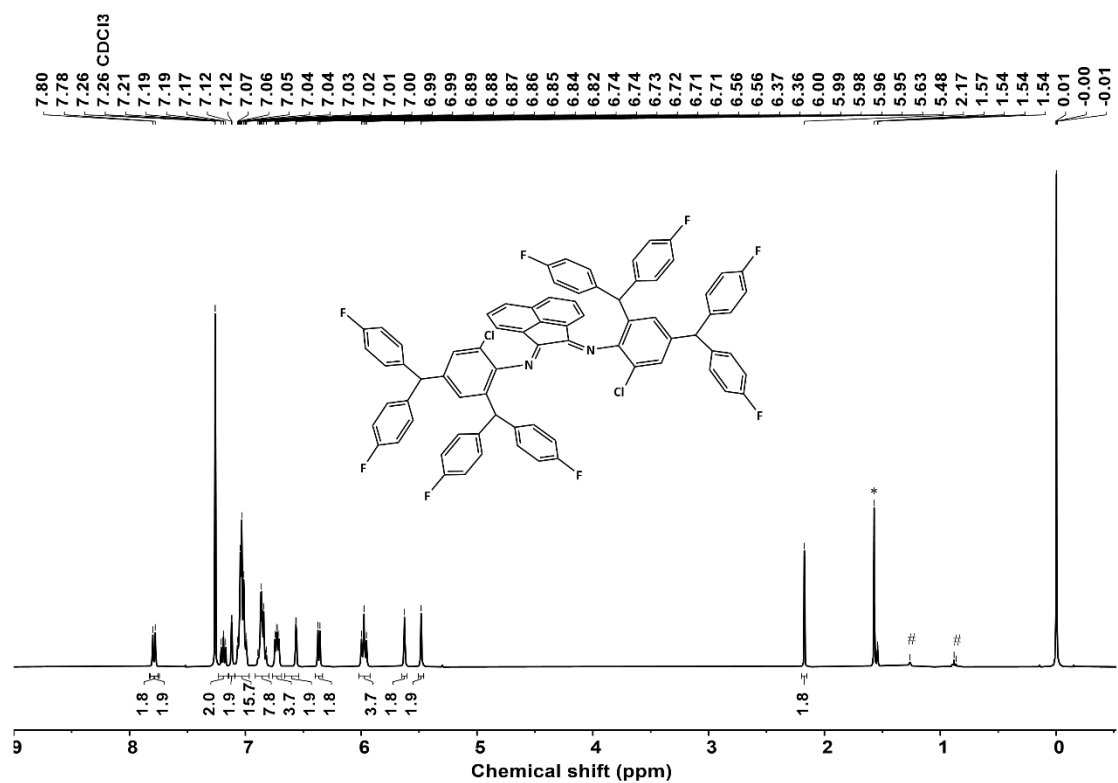

Figure S7.  $^1\text{H}$  NMR spectrum (in  $\text{CDCl}_3$ ) of  $\text{NiBr-Cl}$  [\* water and # hexane].

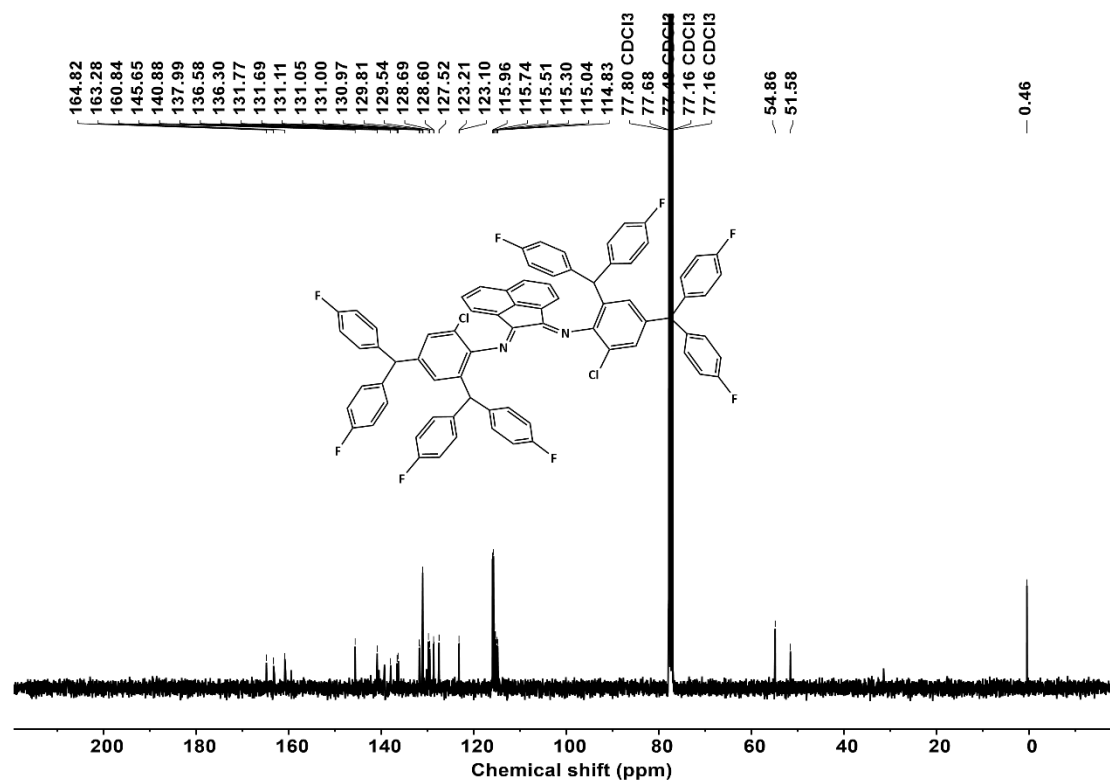

Figure S8.  $^{13}\text{C}$  NMR spectrum (in  $\text{CDCl}_3$ ) of  $\text{NiBr-Cl}$ .

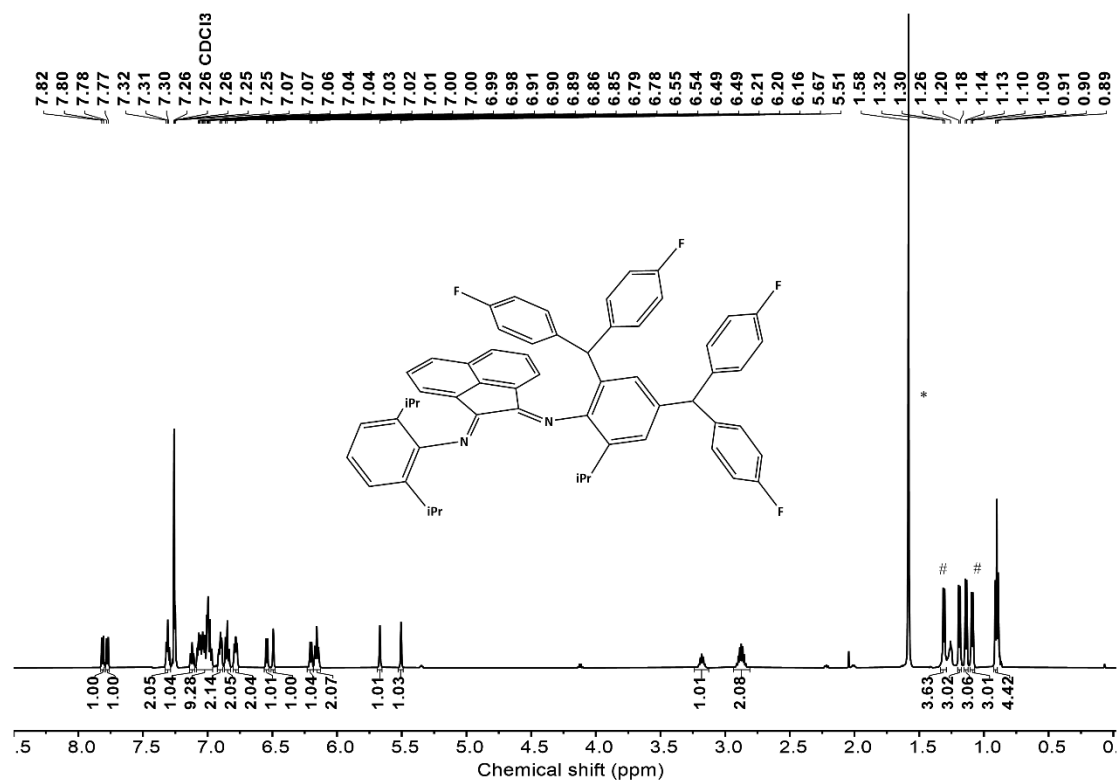

Figure S9.  $^1\text{H}$  NMR spectrum (in  $\text{CDCl}_3$ ) of  $\text{NiBr-iPr}_3$  [\* water and # hexane].

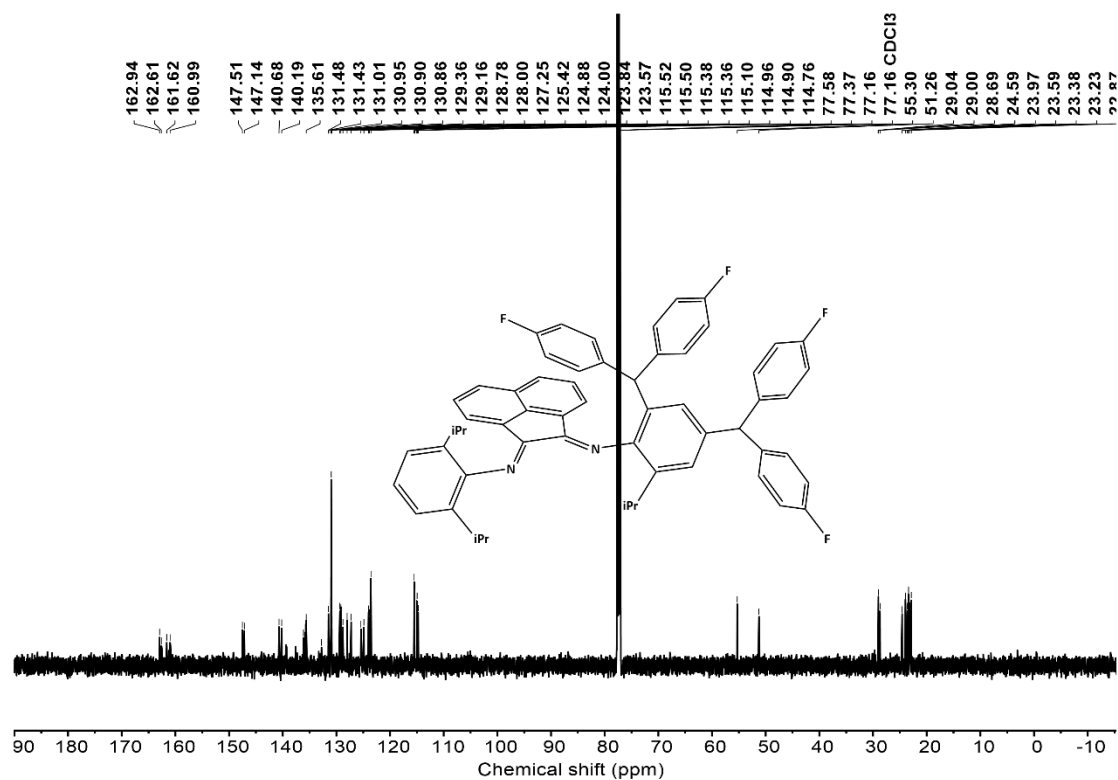

**Figure S10.**  $^{13}\text{C}$  NMR spectrum (in  $\text{CDCl}_3$ ) of  $\text{NiBr-iPr}_3$ .

**7.  $^1\text{H}$  NMR spectra of obtained polyethylene using different nickel complexes at different temperatures.**

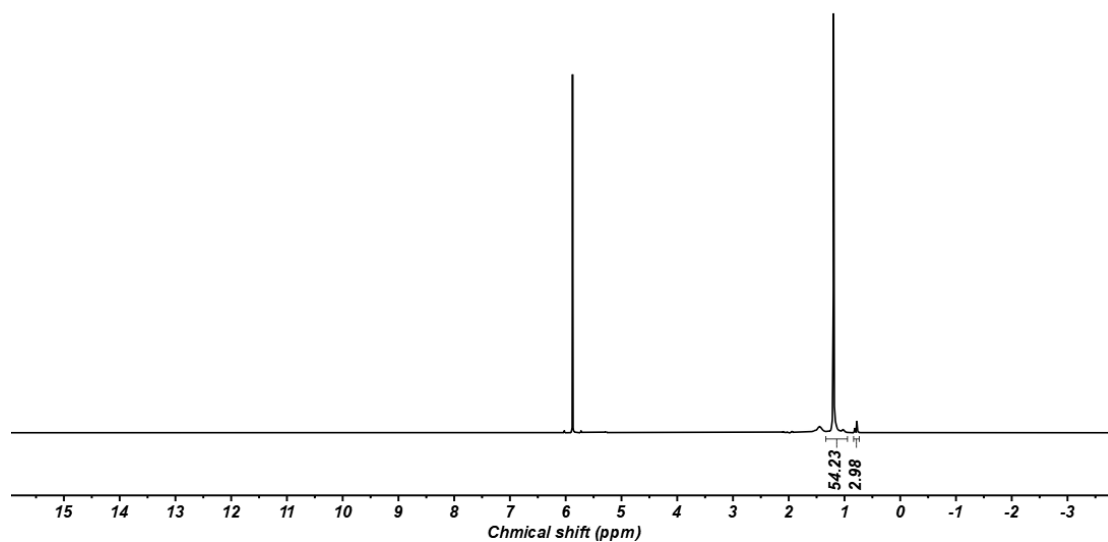

**Figure S11.**  $^1\text{H}$  NMR spectrum of polyethylene produced using  $\text{NiBr-iPr}$  at  $30^\circ\text{C}$  (entry 1, Table 2).

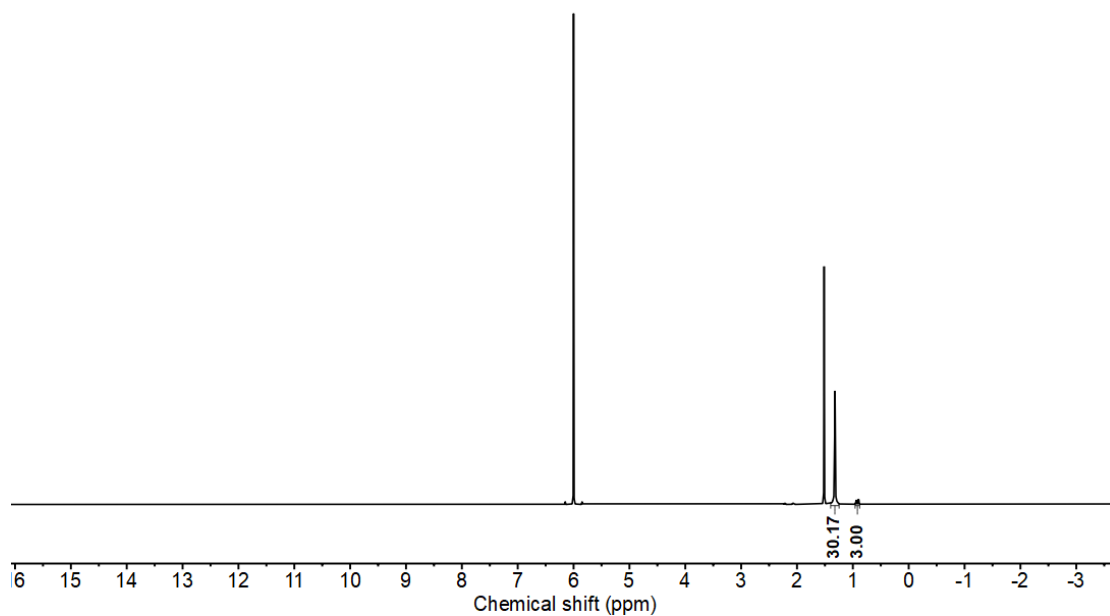

**Figure S12.** <sup>1</sup>H NMR spectrum of polyethylene produced using **NiBr-iPr** at 40 °C (entry 2, Table 2).

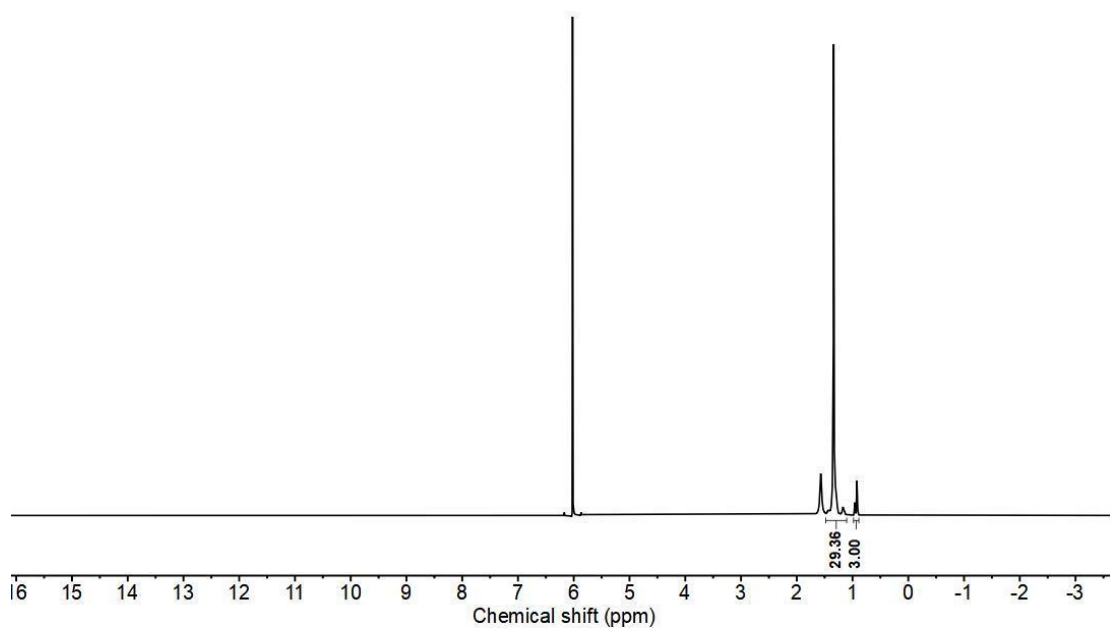

**Figure S13.** <sup>1</sup>H NMR spectrum of polyethylene produced using **NiBr-iPr** at 50 °C (entry 3, Table 2).

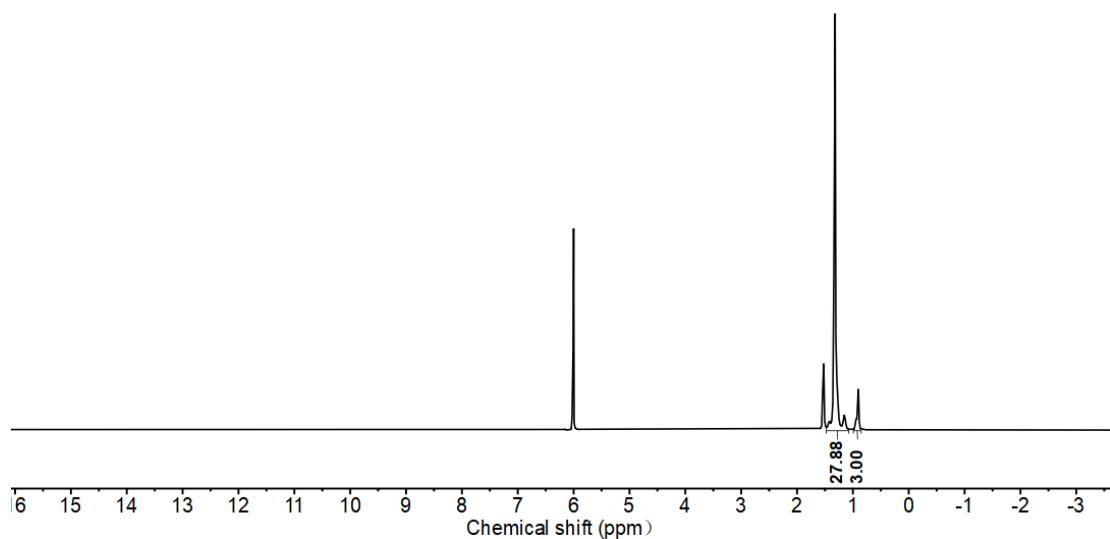

**Figure S14.** <sup>1</sup>H NMR spectrum of polyethylene produced using **NiBr-iPr** at 60 °C (entry 4, Table 2).

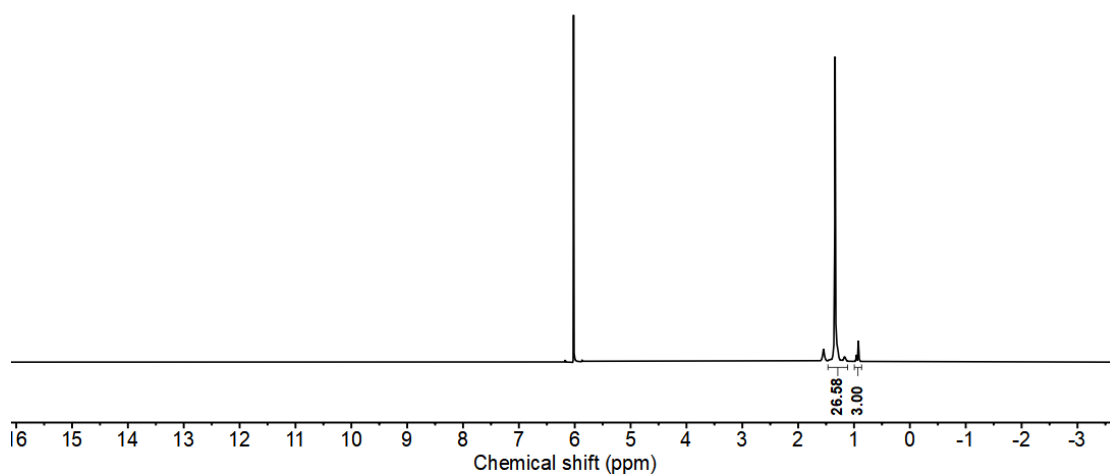

**Figure S15.** <sup>1</sup>H NMR spectrum of polyethylene produced using **NiBr-iPr** at 70 °C (entry 5, Table 2).

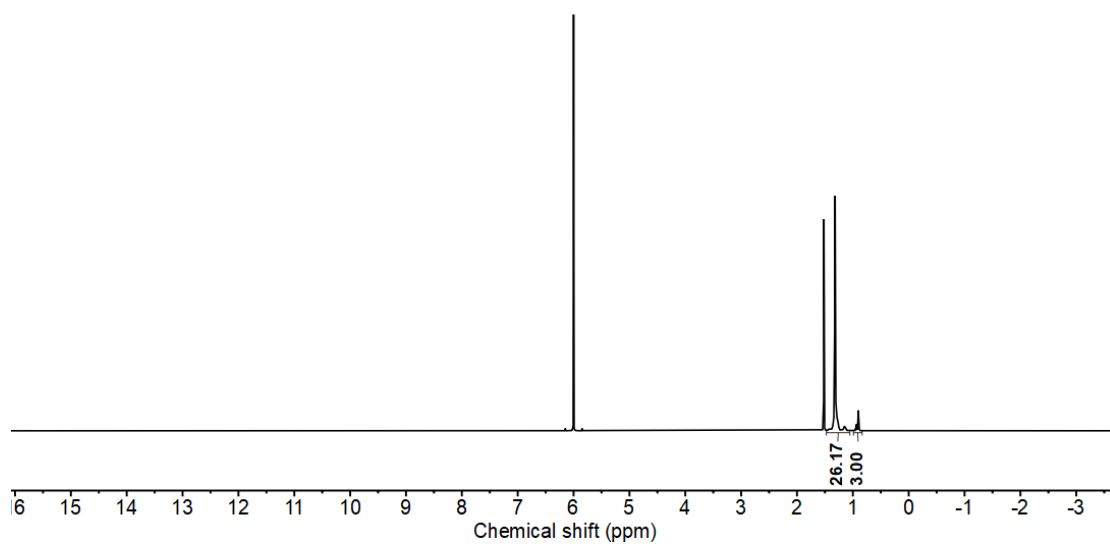

**Figure S16.** <sup>1</sup>H NMR spectrum of polyethylene produced using **NiBr-iPr** at 80 °C (entry 6, Table 2).

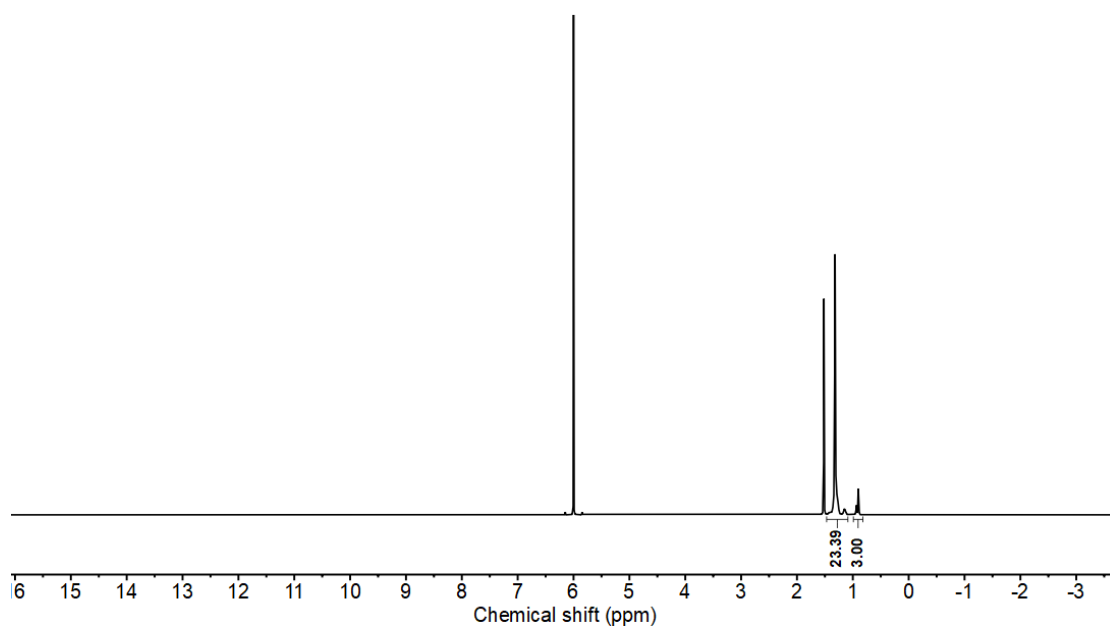

**Figure S17.** <sup>1</sup>H NMR spectrum of polyethylene produced using **NiBr-iPr** at 100 °C (entry 7, Table 2).

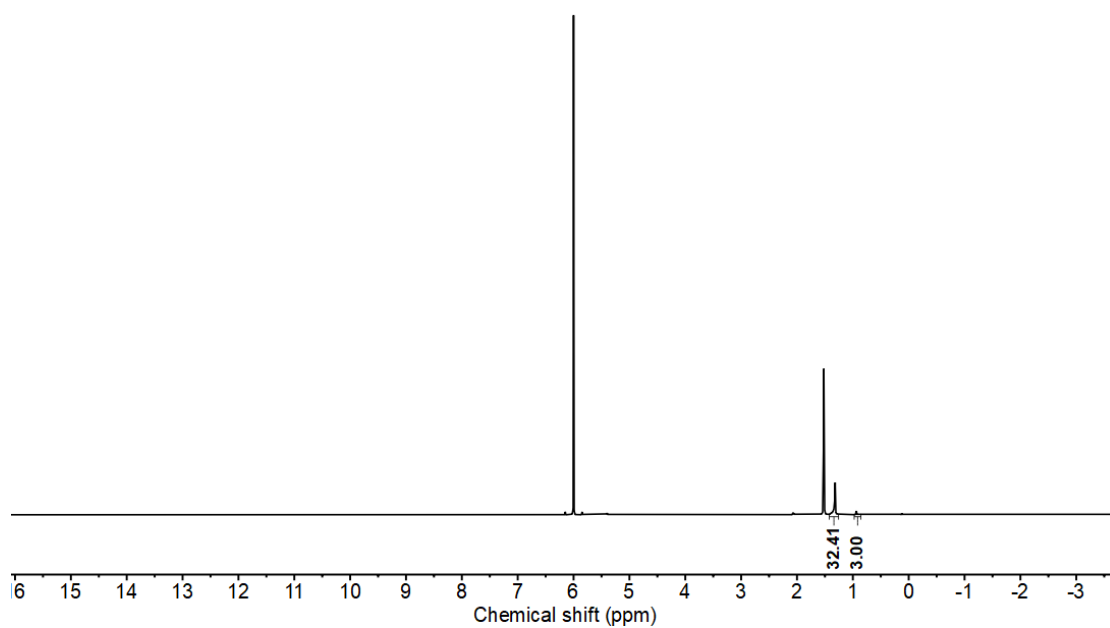

**Figure S18.** <sup>1</sup>H NMR spectrum of polyethylene produced using NiBr-Et at 40 °C (entry 8, Table 2).

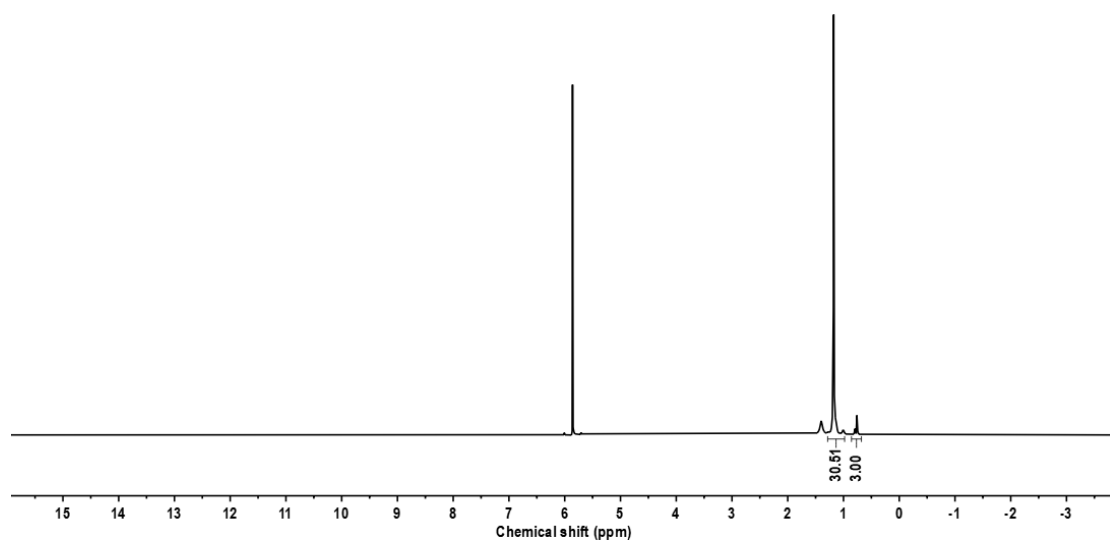

**Figure S19.** <sup>1</sup>H NMR spectrum of polyethylene produced using NiBr-Et at 60 °C (entry 9, Table 2).



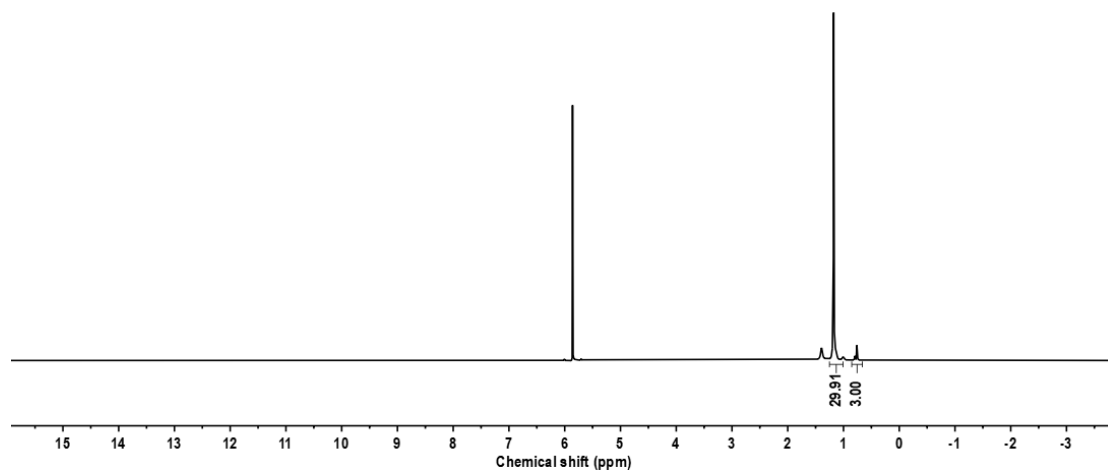

**Figure S20.** <sup>1</sup>H NMR spectrum of polyethylene produced using NiBr-Et at 80 °C (entry 10, Table 2).

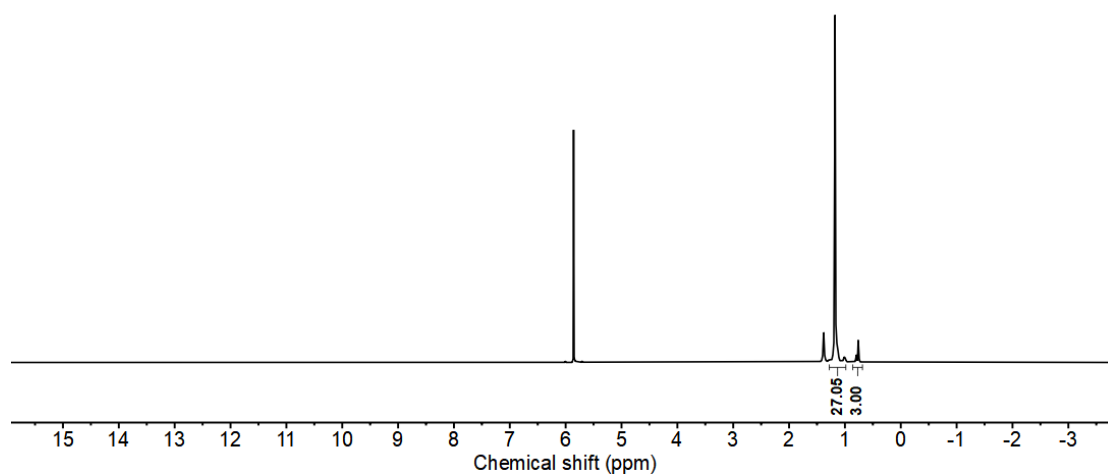

**Figure S21.** <sup>1</sup>H NMR spectrum of polyethylene produced using NiBr-Et at 100 °C (entry 11, Table 2).

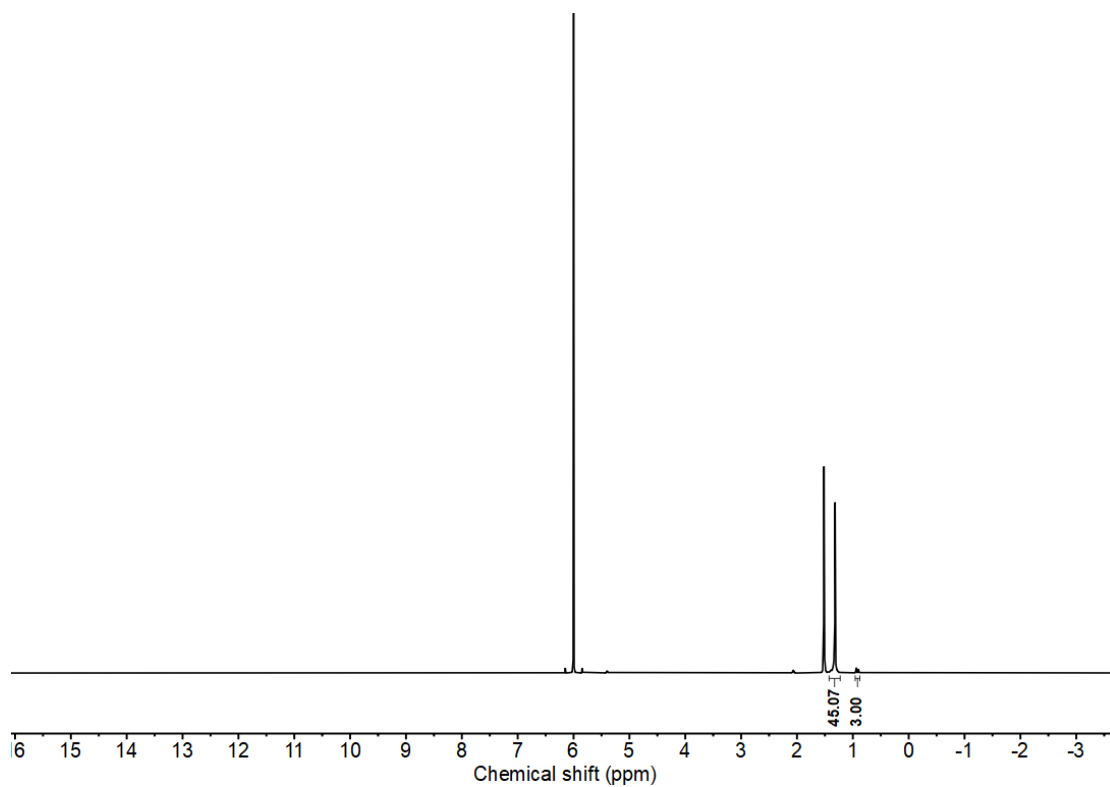

**Figure S22.** <sup>1</sup>H NMR spectrum of polyethylene produced using NiBr-Me at 40 °C (entry 12, Table 2).

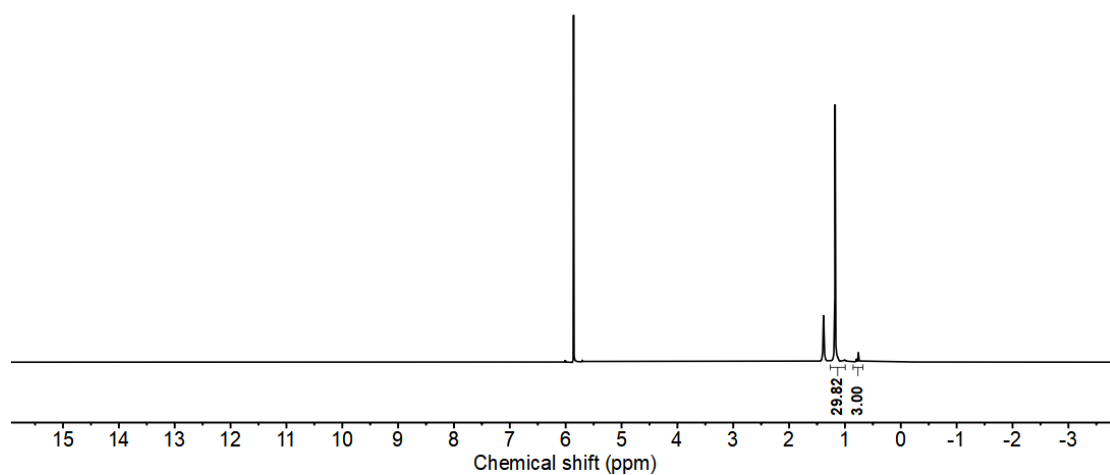

**Figure S23.** <sup>1</sup>H NMR spectrum of polyethylene produced using NiBr-Me at 60 °C (entry 13, Table 2).

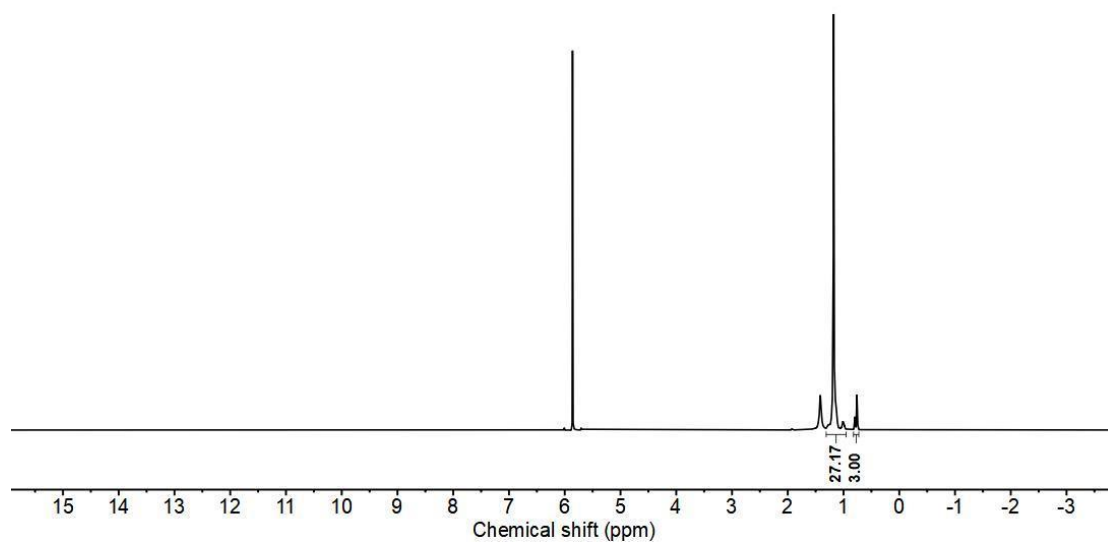

**Figure S24.** <sup>1</sup>H NMR spectrum of polyethylene produced using **NiBr-Me** at 80 °C (entry 14, Table 2).

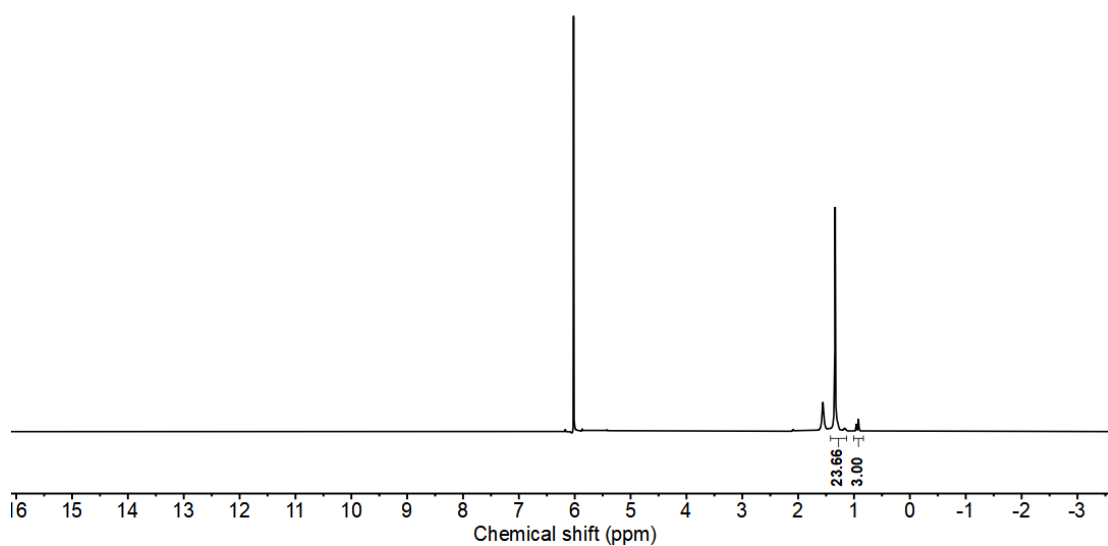

**Figure S25.** <sup>1</sup>H NMR spectrum of polyethylene produced using **NiBr-Me** at 100 °C (entry 15, Table 2).

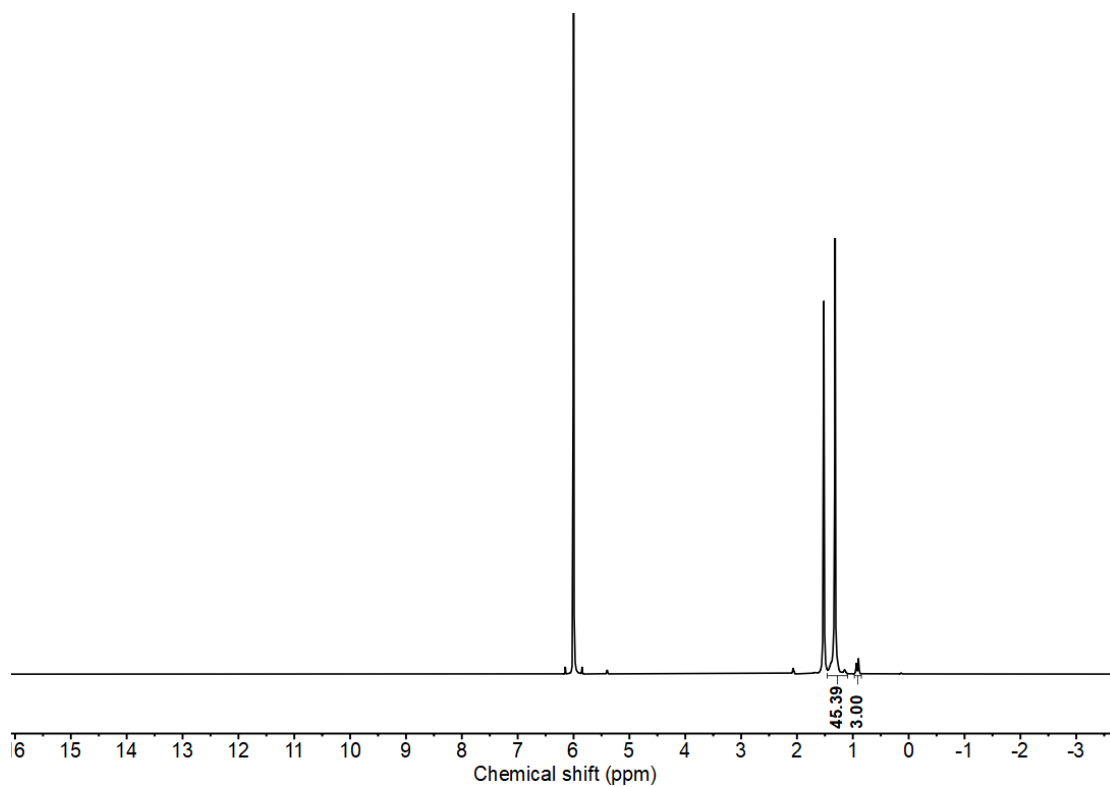

**Figure S26.** <sup>1</sup>H NMR spectrum of polyethylene produced using NiBr-Cl at 40 °C (entry 16, Table 2).

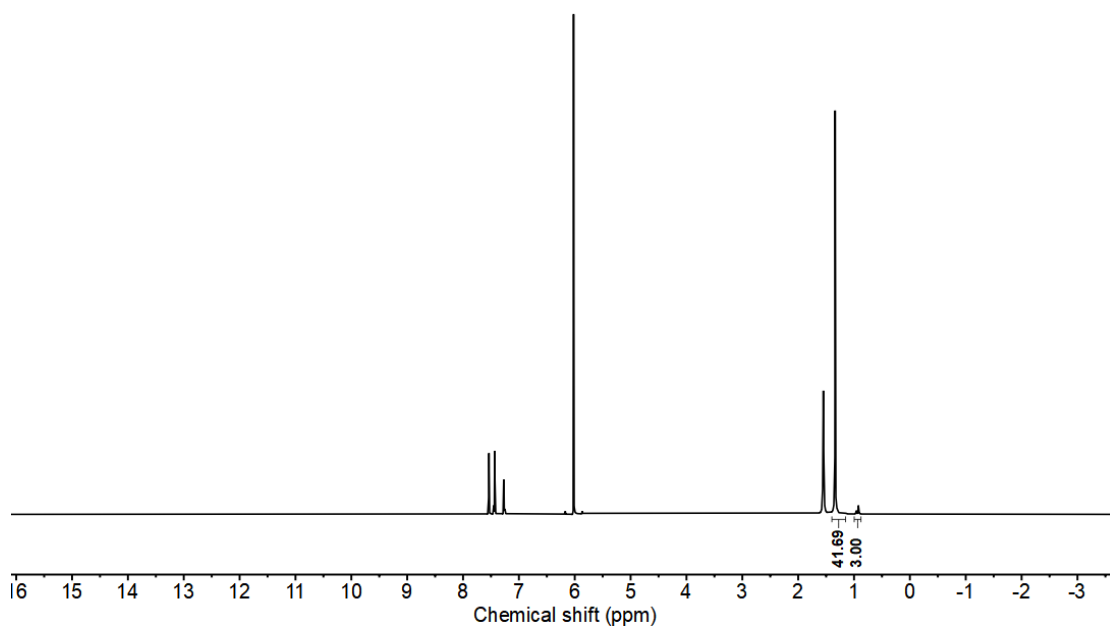

**Figure S27.** <sup>1</sup>H NMR spectrum of polyethylene produced using NiBr-Cl at 60 °C (entry 17, Table 2).

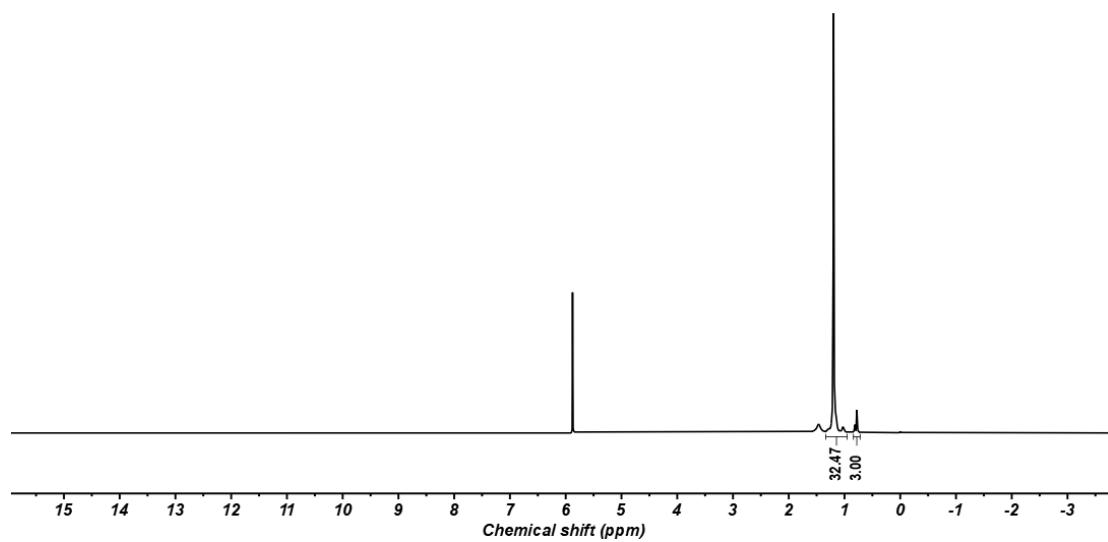

**Figure S28.** <sup>1</sup>H NMR spectrum of polyethylene produced using NiBr-Cl at 80 °C (entry 18, Table 2).

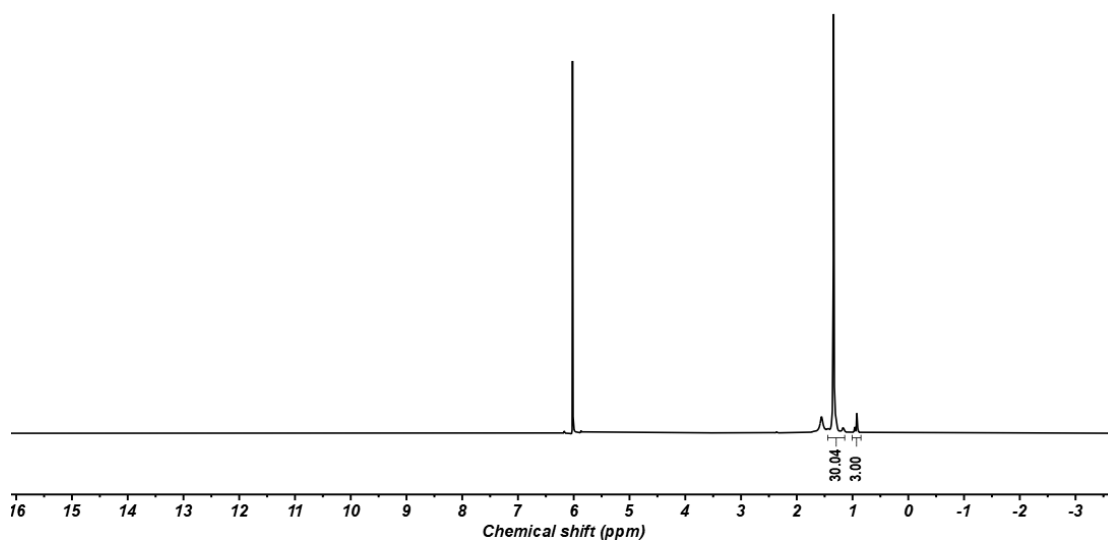

**Figure S29.** <sup>1</sup>H NMR spectrum of polyethylene produced using NiBr-Cl at 100 °C (entry 19, Table 2).

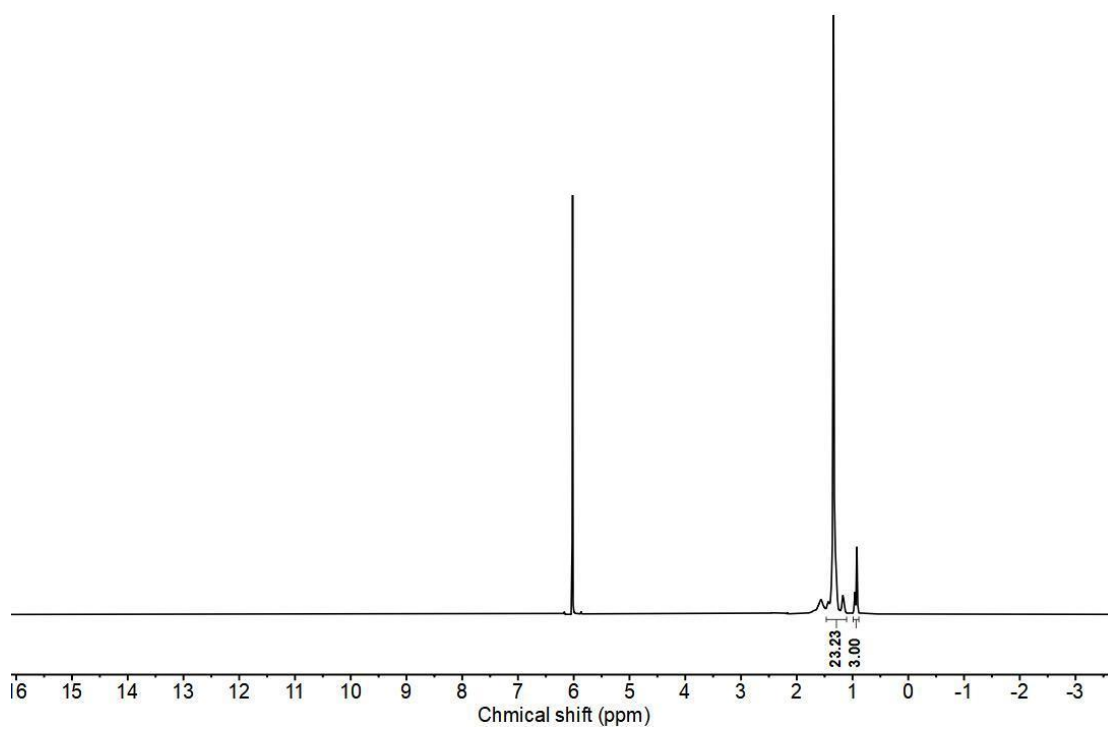

**Figure S30.** <sup>1</sup>H NMR spectrum of polyethylene produced using NiBr-iPr<sub>3</sub> at 40 °C (entry 20, Table 2).

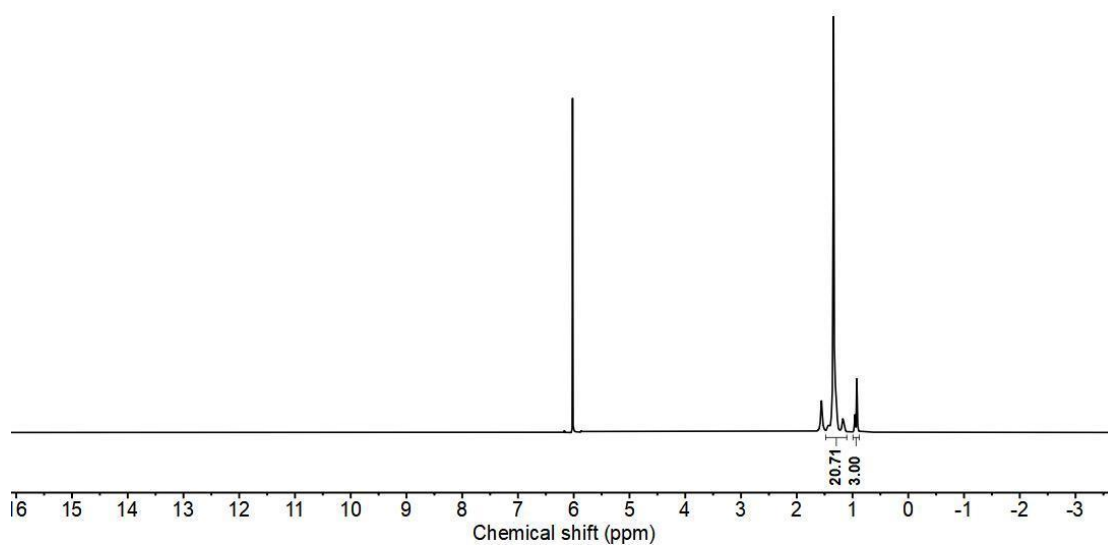

**Figure S31.** <sup>1</sup>H NMR spectrum of polyethylene produced using NiBr-iPr<sub>3</sub> at 60 °C (entry 21, Table 2).

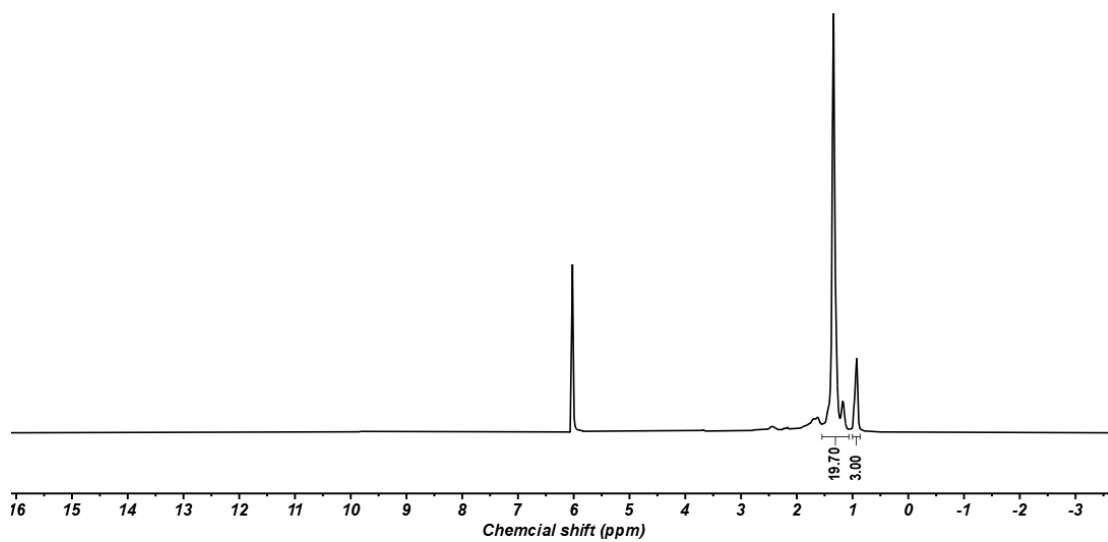

**Figure S32.** <sup>1</sup>H NMR spectrum of polyethylene produced using **NiBr-iPr<sub>3</sub>** at 80 °C (entry 22, Table 2).

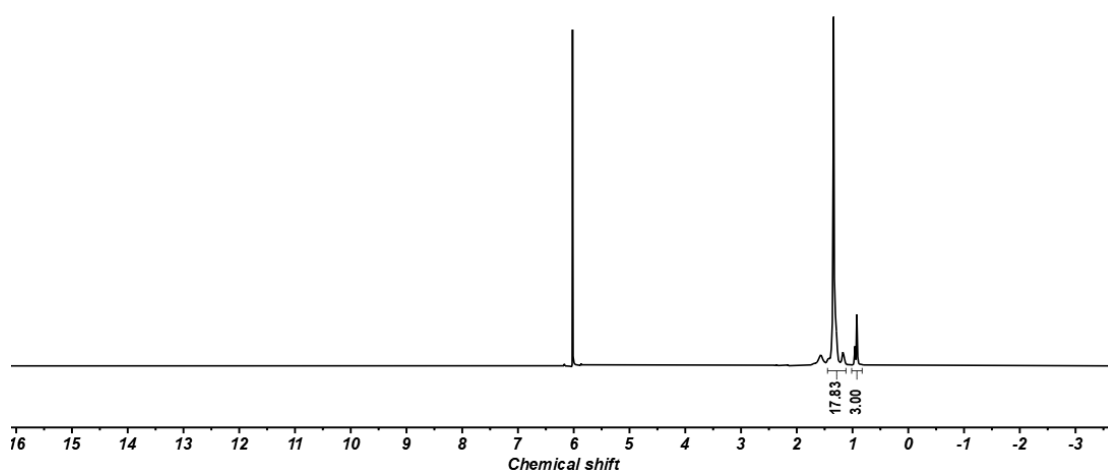

**Figure S33.** <sup>1</sup>H NMR spectrum of polyethylene produced using **NiBr-iPr<sub>3</sub>** at 100 °C (entry 23, Table 2).

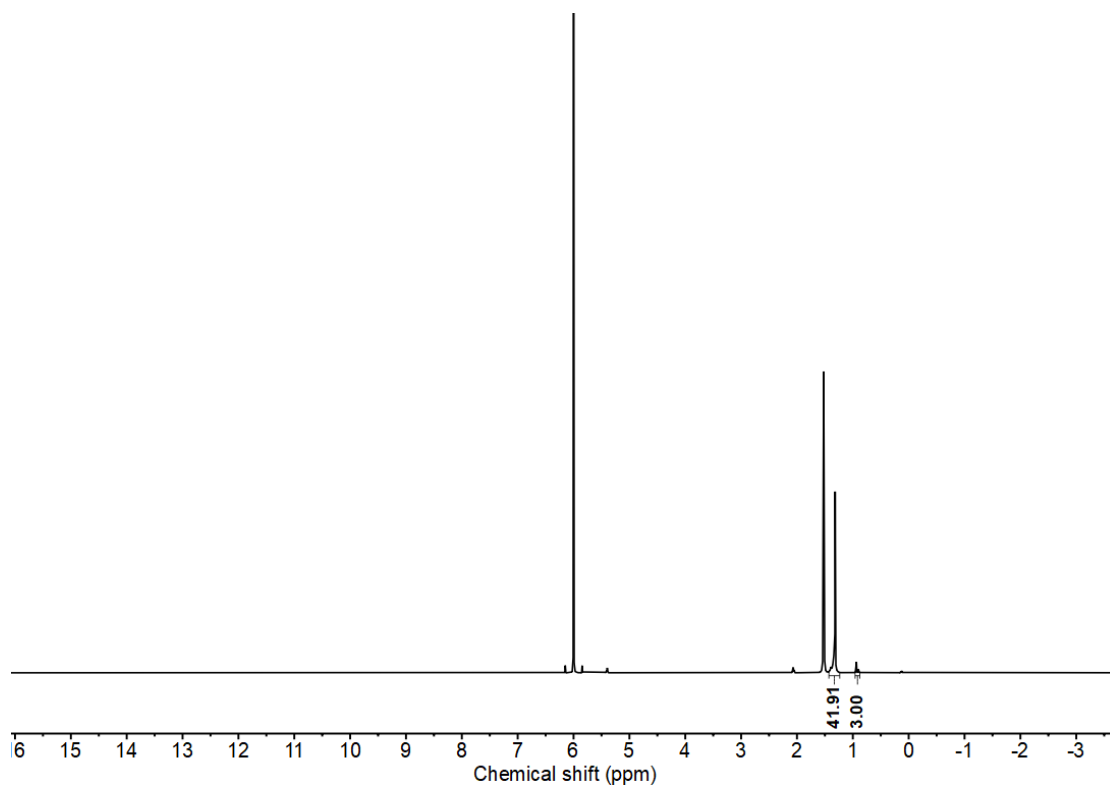

**Figure S34.** <sup>1</sup>H NMR spectrum of polyethylene produced using **NiCl-iPr** at 40 °C (entry 24, Table 2).

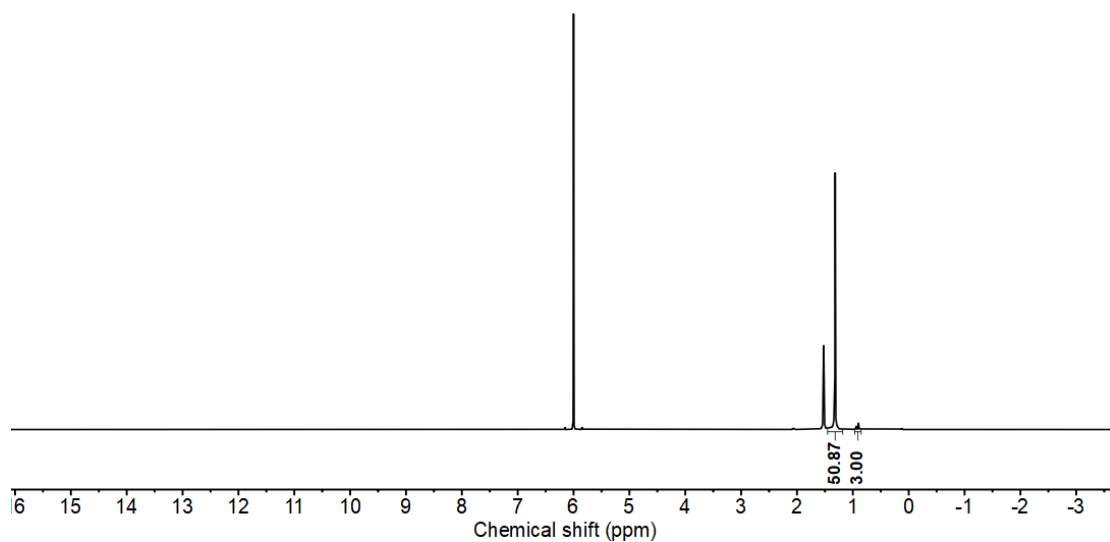

**Figure S35.** <sup>1</sup>H NMR spectrum of polyethylene produced using **NiCl-Et** at 40 °C (entry 25, Table 2).



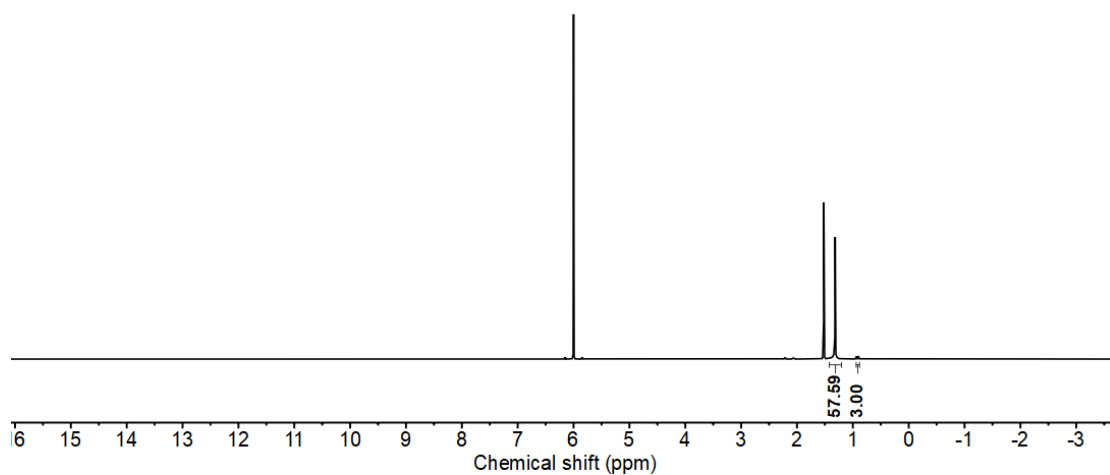

**Figure S36.** <sup>1</sup>H NMR spectrum of polyethylene produced using NiCl-Me at 40 °C (entry 26, Table 2).

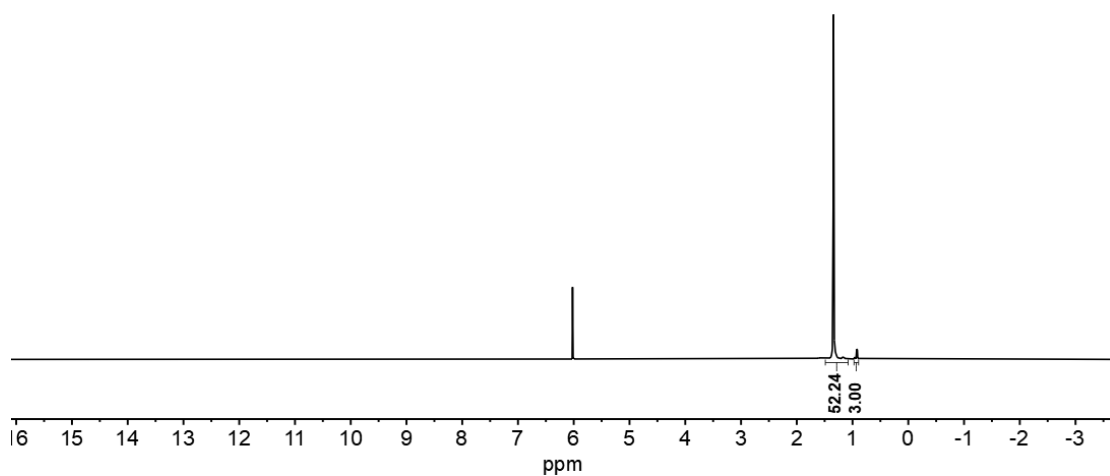

**Figure S37.** <sup>1</sup>H NMR spectrum of polyethylene produced using NiCl-Cl at 40 °C (entry 27, Table 2).

8.  $^{13}\text{C}$  NMR spectrum of polyethylene obtained at different polymerization temperature using NiBr-iPr

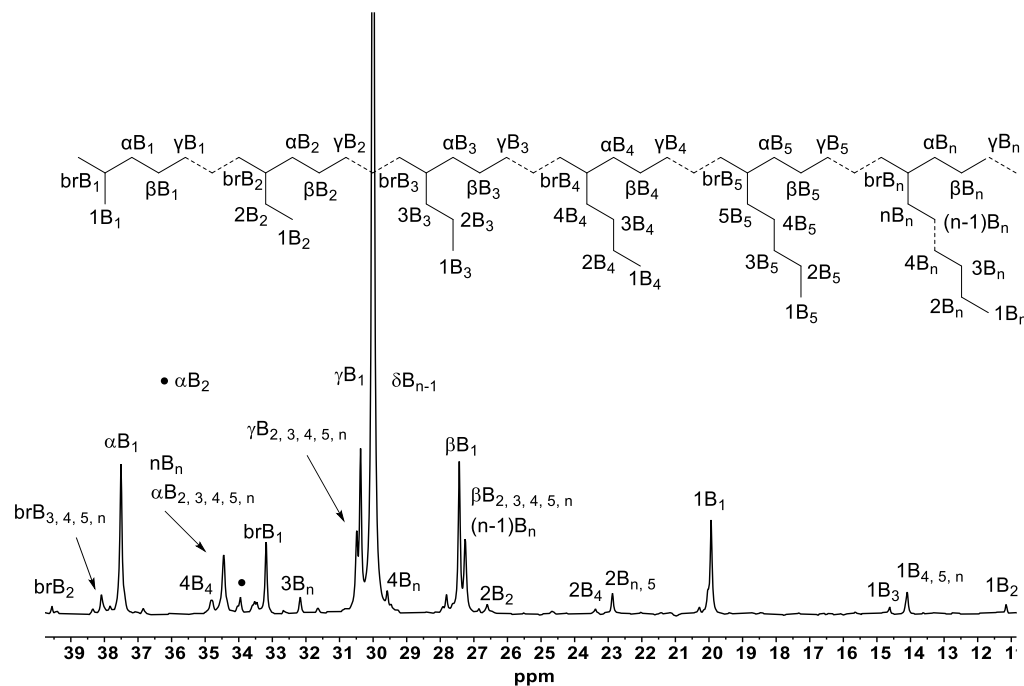

Figure S38.  $^{13}\text{C}$  NMR spectrum of polyethylene obtained at polymerization temperature of 40 °C using NiBr-iPr (entry 2, Table 2).

9. GPC curves of obtained polyethylene using different catalysts at different temperatures

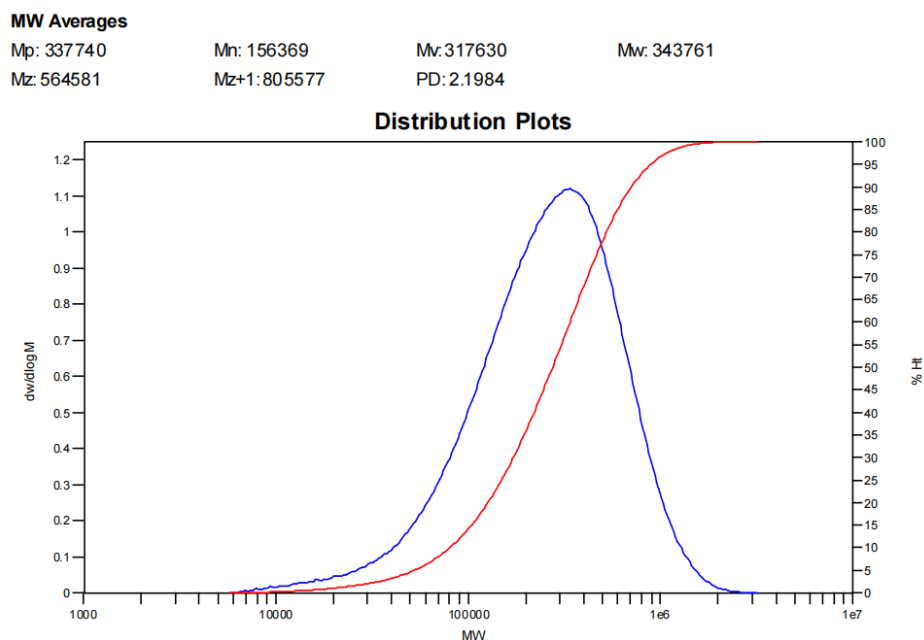

Figure S39. GPC curves of obtained polyethylene using NiBr-iPr at 30°C temperatures (entry 1, Table 2).

**MW Averages**

Mp: 278196

Mn: 136128

Mr: 303683

Mw: 334590

Mz: 613866

Mz+1: 927997

PD: 2.4579

**Distribution Plots**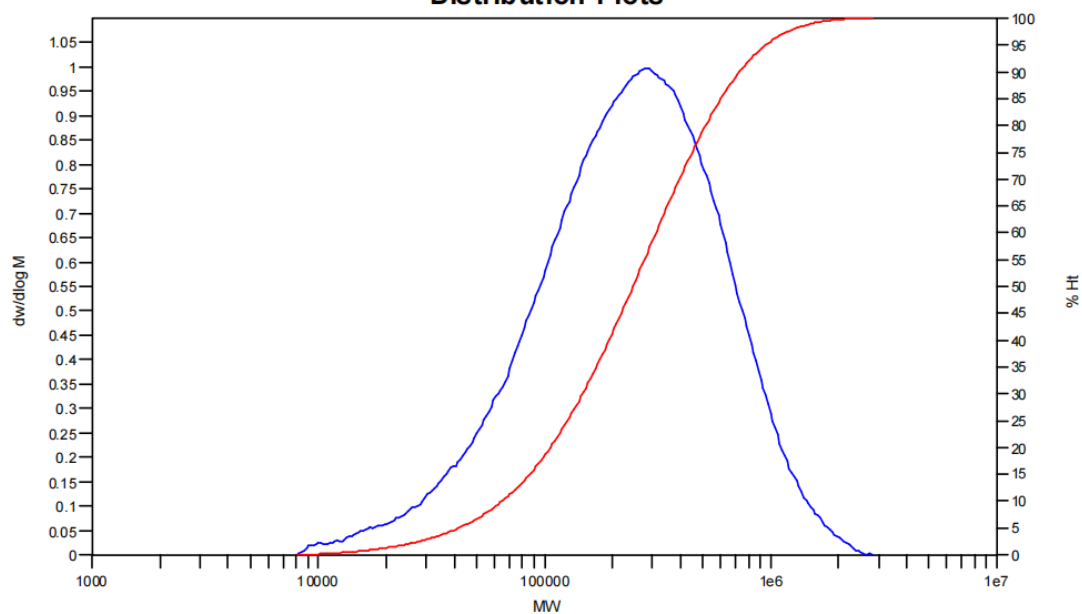

**Figure S40.** GPC curves of obtained polyethylene using **NiBr-iPr** at 40 °C temperatures (entry 2, Table 2).

**MW Averages**

Mp: 188299

Mn: 117384

Mr: 205383

Mw: 220393

Mz: 345706

Mz+1: 477336

PD: 1.8775

**Distribution Plots**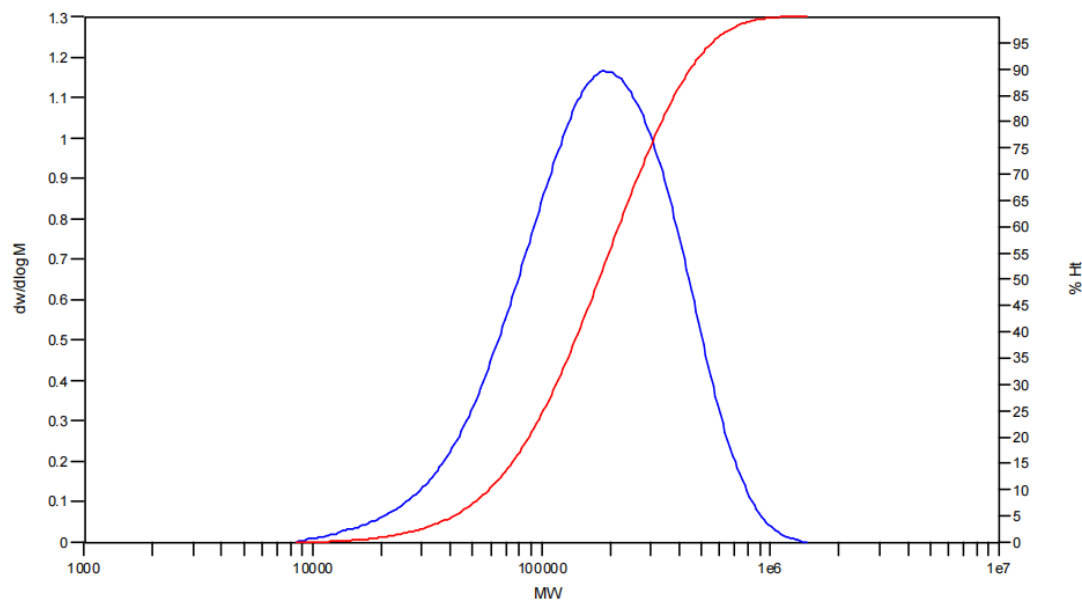

**Figure S41.** GPC curves of obtained polyethylene using **NiBr-iPr** at 50°C temperatures (entry 3, Table 2).

**MW Averages**

Mp: 175037

Mn: 113622

Mv: 199373

Mw: 214834

Mz: 348887

Mz+1: 499520

PD: 1.8908

**Distribution Plots**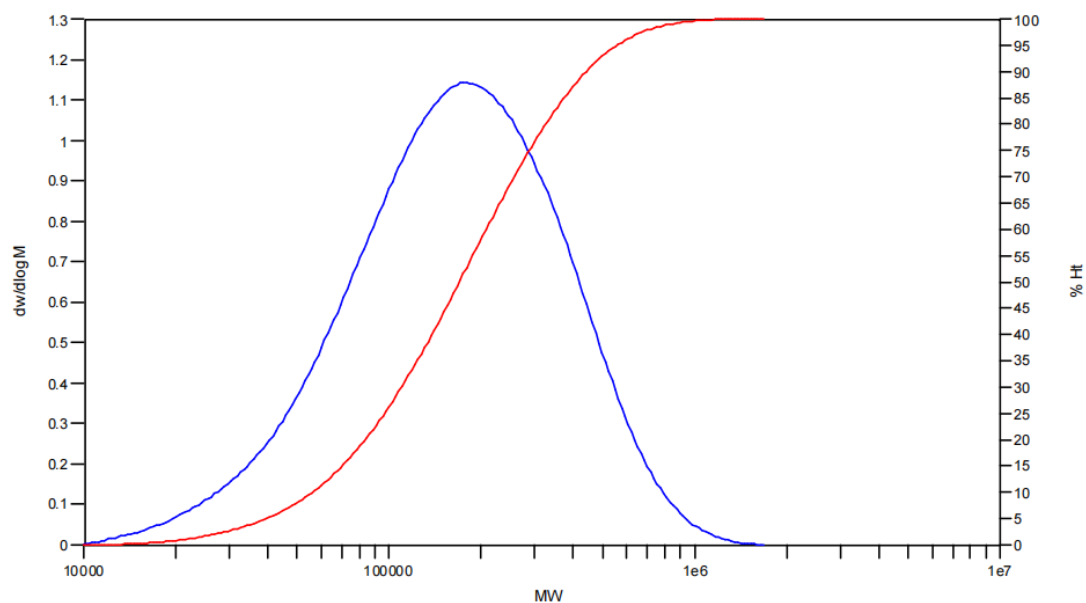

**Figure S42.** GPC curves of obtained polyethylene using NiBr-iPr at 60 °C temperatures (entry 4, Table 2).

**MW Averages**

Mp: 175037

Mn: 94197

Mv: 180019

Mw: 194235

Mz: 315774

Mz+1: 457595

PD: 2.0620

**Distribution Plots**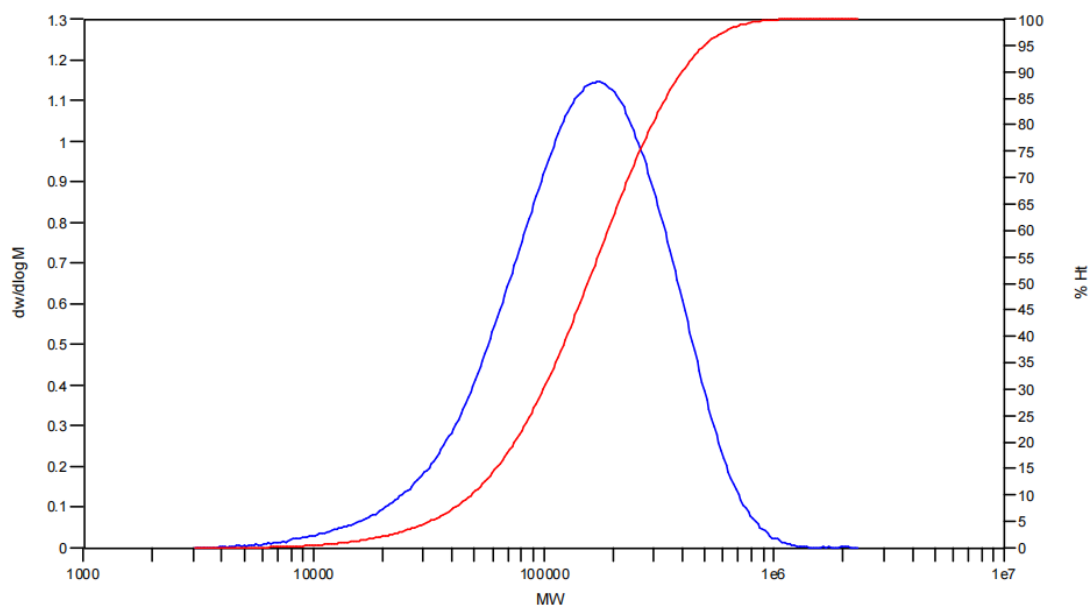

**Figure S43.** GPC curves of obtained polyethylene using NiBr-iPr at 70 °C temperatures (entry 5, Table 2).

**MW Averages**

Mp: 130696

Mn: 77627

Mv: 140057

Mw: 150713

Mz: 240928

Mz+1: 339180

PD: 1.9415

**Distribution Plots**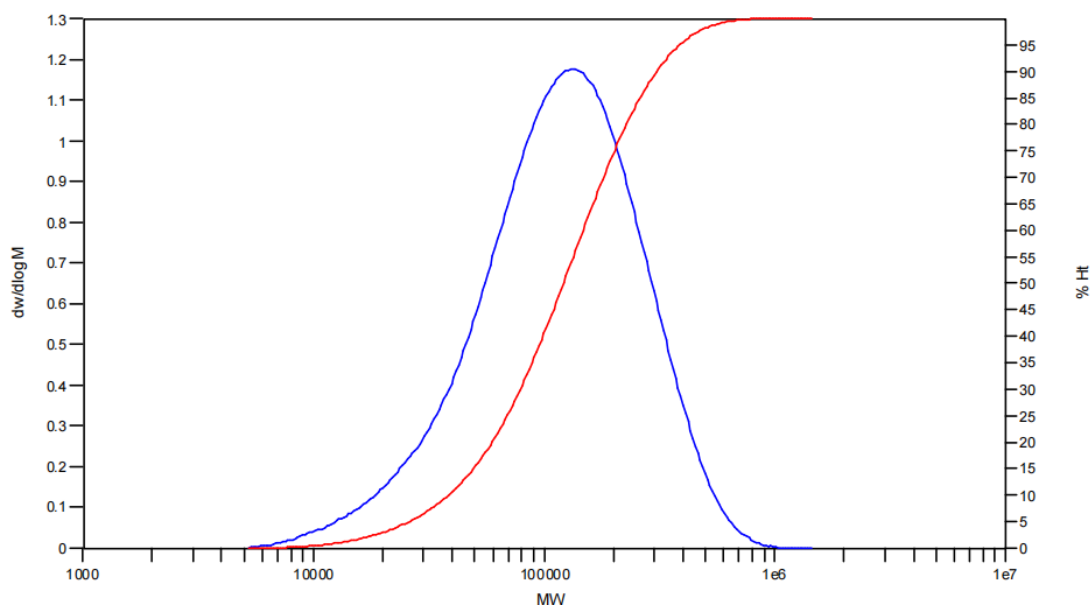

**Figure S44.** GPC curves of obtained polyethylene using NiBr-iPr at 80°C temperatures (entry 6, Table 2).

**MW Averages**

Mp: 107568

Mn: 62885

Mv: 110962

Mw: 119180

Mz: 188452

Mz+1: 263256

PD: 1.8952

**Distribution Plots**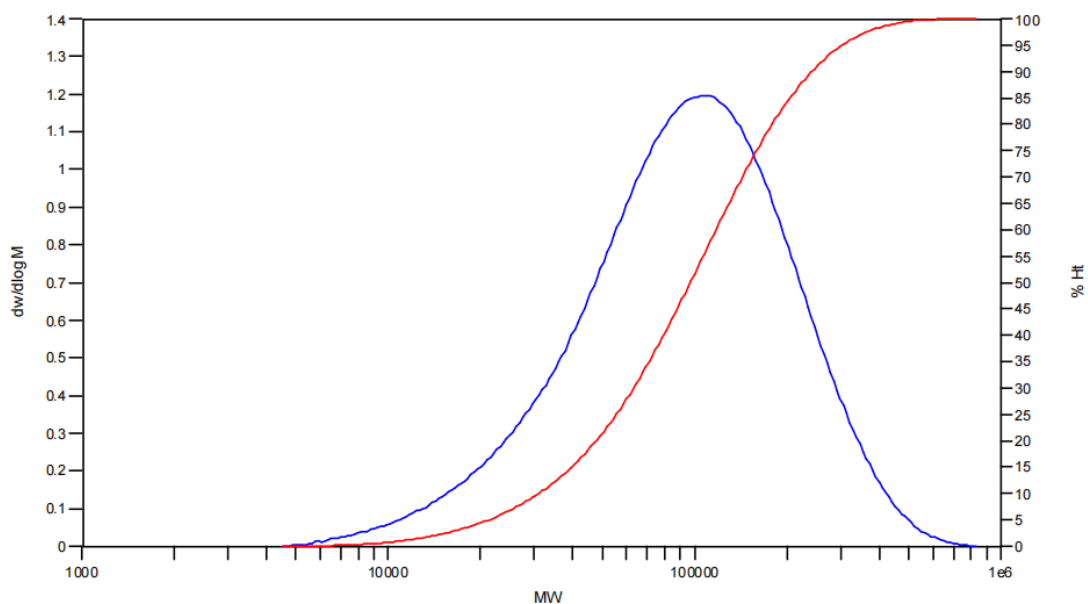

**Figure S45.** GPC curves of obtained polyethylene using NiBr-iPr at 100°C temperatures (entry 7, Table 2).

**MW Averages**

Mp: 223282

Mn: 139649

Mv: 235041

Mw: 251663

Mz: 389809

Mz+1: 532531

PD: 1.8021

**Distribution Plots**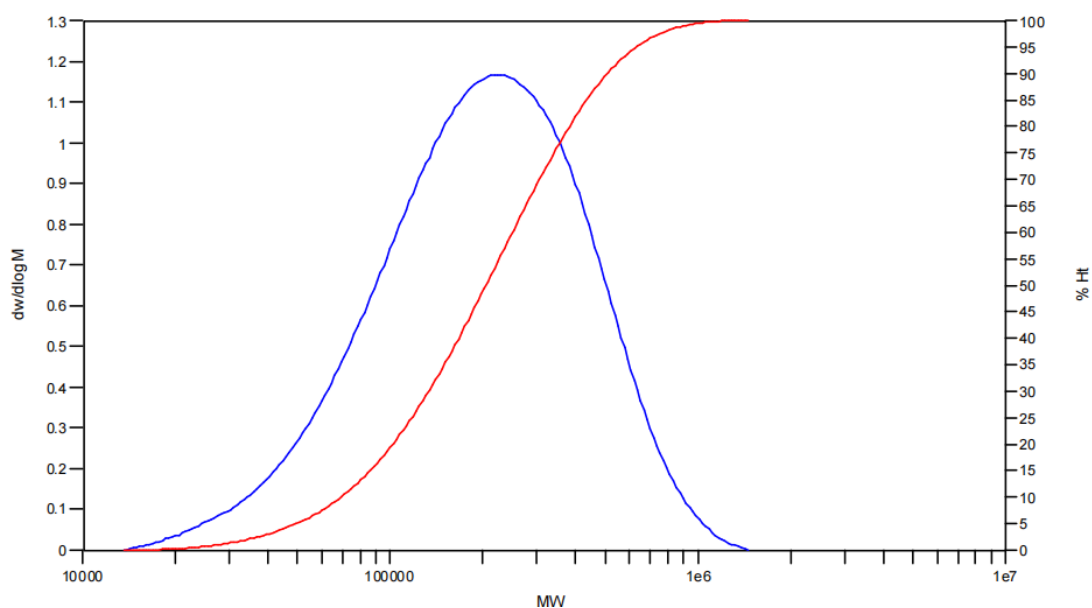

**Figure S46.** GPC curves of obtained polyethylene using NiBr-Et at 40°C temperatures (entry 8, Table 2).

**MW Averages**

Mp: 151251

Mn: 90592

Mv: 167199

Mw: 180808

Mz: 297023

Mz+1: 419750

PD: 1.9958

**Distribution Plots**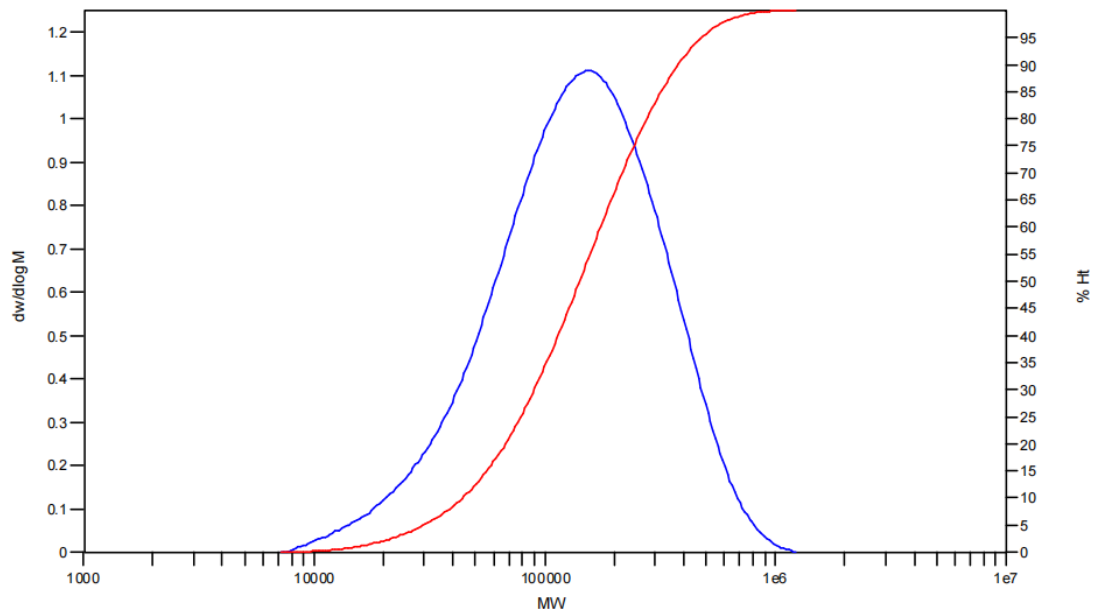

**Figure S47.** GPC curves of obtained polyethylene using NiBr-Et at 60°C temperatures (entry 9, Table 2).

**MW Averages**

Mp: 137217

Mn: 82252

Mv: 144755

Mw: 155490

Mz: 246514

Mz+1: 346688

PD: 1.8904

**Distribution Plots**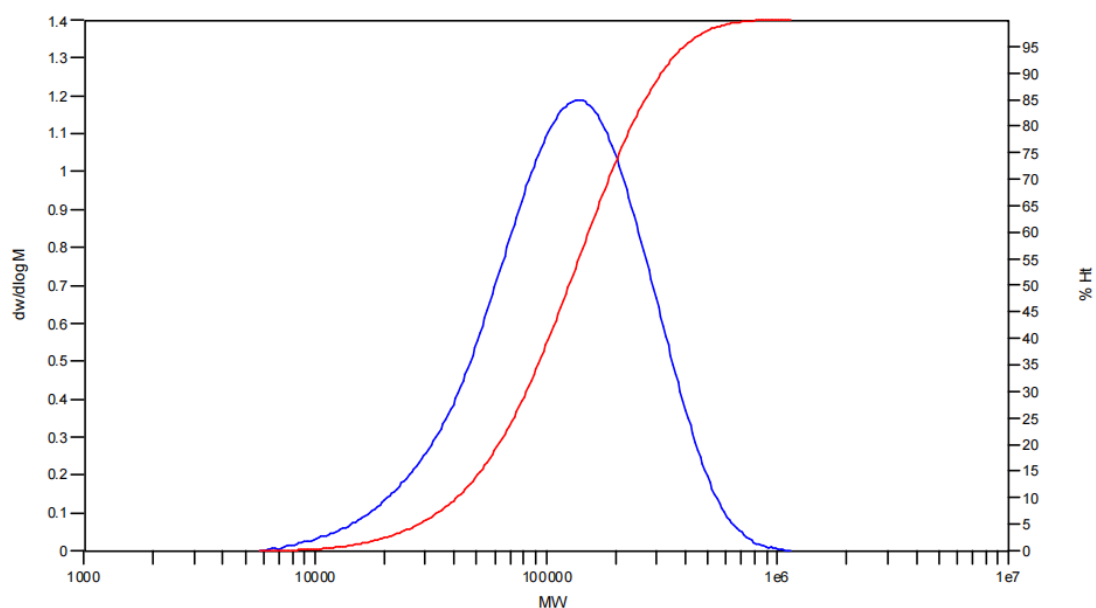

**Figure S48.** GPC curves of obtained polyethylene using **NiBr-Et** at 80°C temperatures (entry 10, Table 2).

**MW Averages**

Mp: 90715

Mn: 52962

Mv: 95255

Mw: 102552

Mz: 165887

Mz+1: 242056

PD: 1.9363

**Distribution Plots**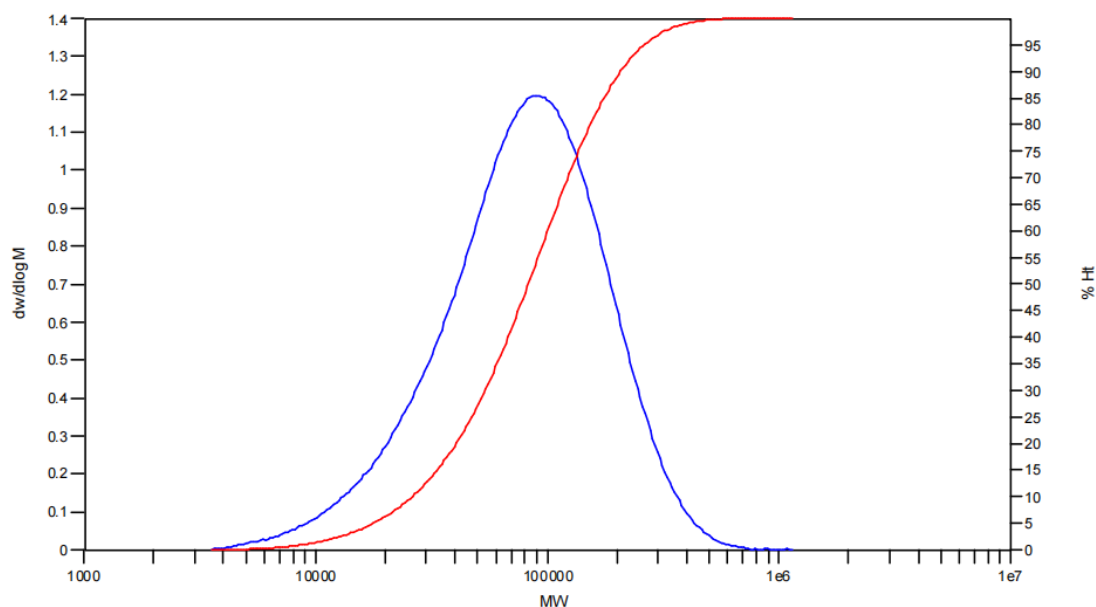

**Figure S49.** GPC curves of obtained polyethylene using **NiBr-Et** at 100°C temperatures (entry 11, Table 2).

**MW Averages**

Mp: 197694

Mn: 106383

Mr: 204812

Mw: 221839

Mz: 364853

Mz+1: 512218

PD: 2.0853

**Distribution Plots**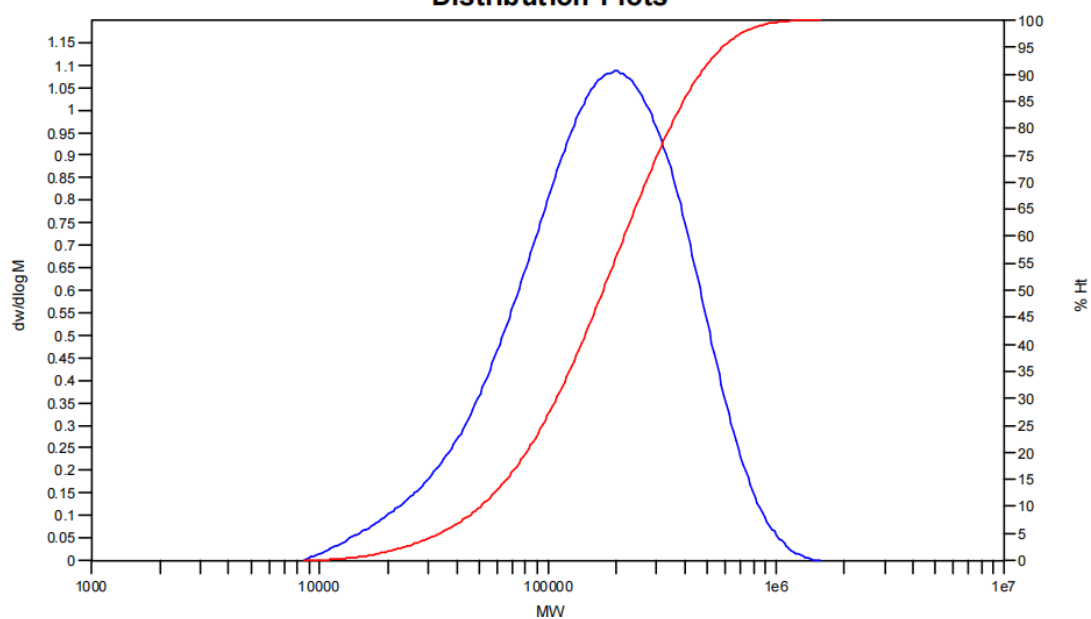

**Figure S50.** GPC curves of obtained polyethylene using NiBr-Me at 40°C temperatures (entry 12, Table 2).

**MW Averages**

Mp: 144063

Mn: 84030

Mr: 156725

Mw: 169026

Mz: 273816

Mz+1: 390134

PD: 2.0115

**Distribution Plots**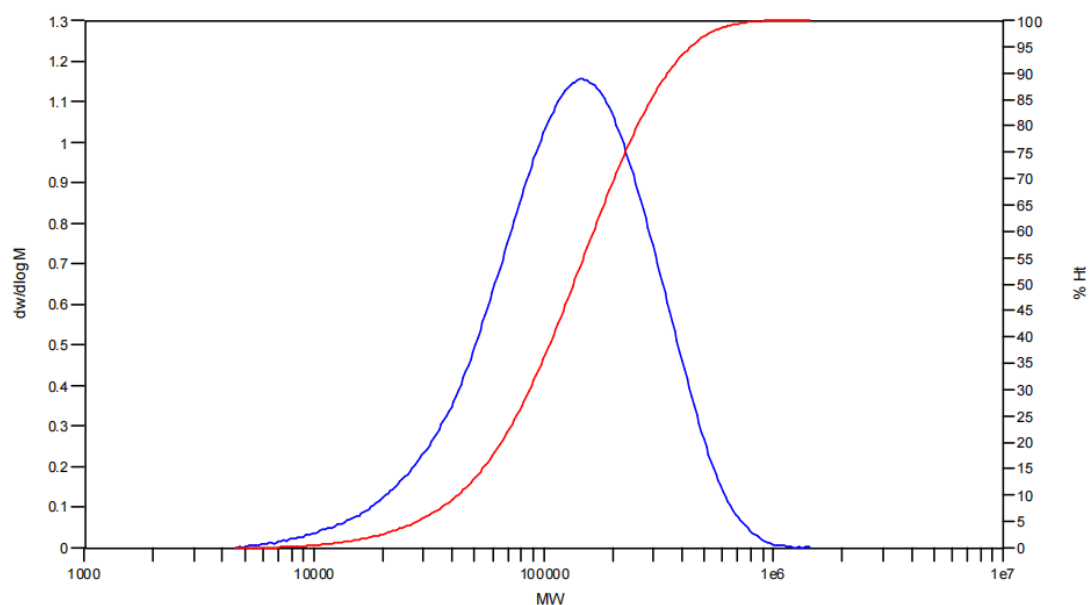

**Figure S51.** GPC curves of obtained polyethylene using NiBr-Me at 60°C temperatures (entry 13, Table 2).



### MW Averages

Mp: 99993

Mn: 52052

Mv: 120087

Mw: 133588

Mz: 263881

Mz+1: 423465

PD: 2.5664

### Distribution Plots

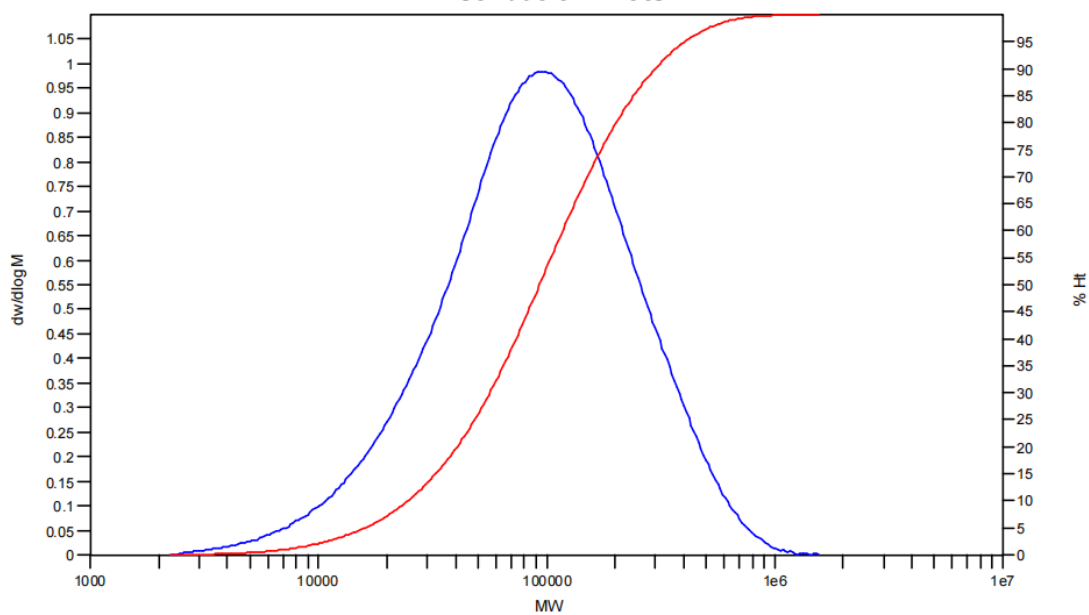

**Figure S52.** GPC curves of obtained polyethylene using **NiBr-Me** at 80°C temperatures (entry 14, Table 2).

### MW Averages

Mp: 86404

Mn: 47027

Mv: 93255

Mw: 101478

Mz: 176968

Mz+1: 275937

PD: 2.1579

### Distribution Plots

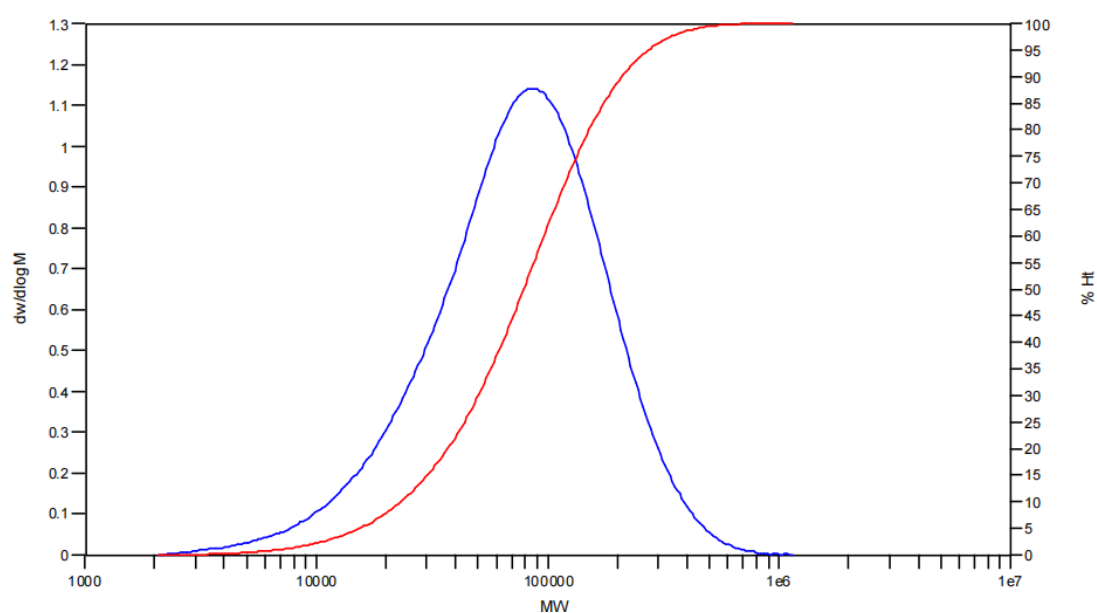

**Figure S53.** GPC curves of obtained polyethylene using **NiBr-Me** at 100°C temperatures (entry 15, Table 2).

**MW Averages**

Mp: 107568

Mn: 61872

Mv: 113892

Mw: 123064

Mz: 202181

Mz+1: 289962

PD: 1.9890

**Distribution Plots**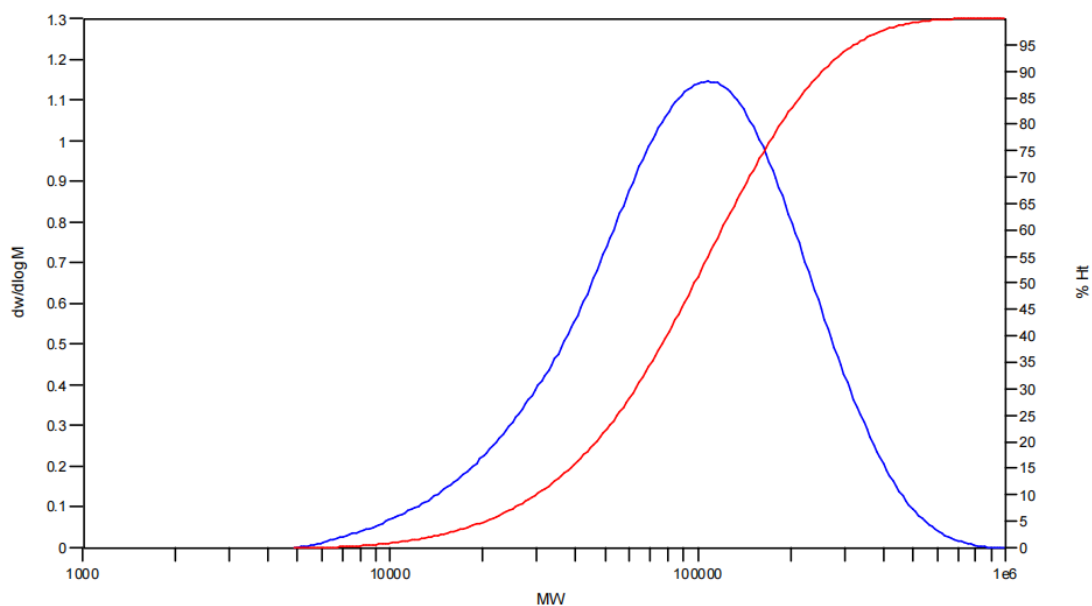

**Figure S54.** GPC curves of obtained polyethylene using **NiBr-Cl** at 40°C temperatures (entry 16, Table 2).

**MW Averages**

Mp: 81417

Mn: 44425

Mv: 95836

Mw: 104565

Mz: 184700

Mz+1: 287228

PD: 2.3537

**Distribution Plots**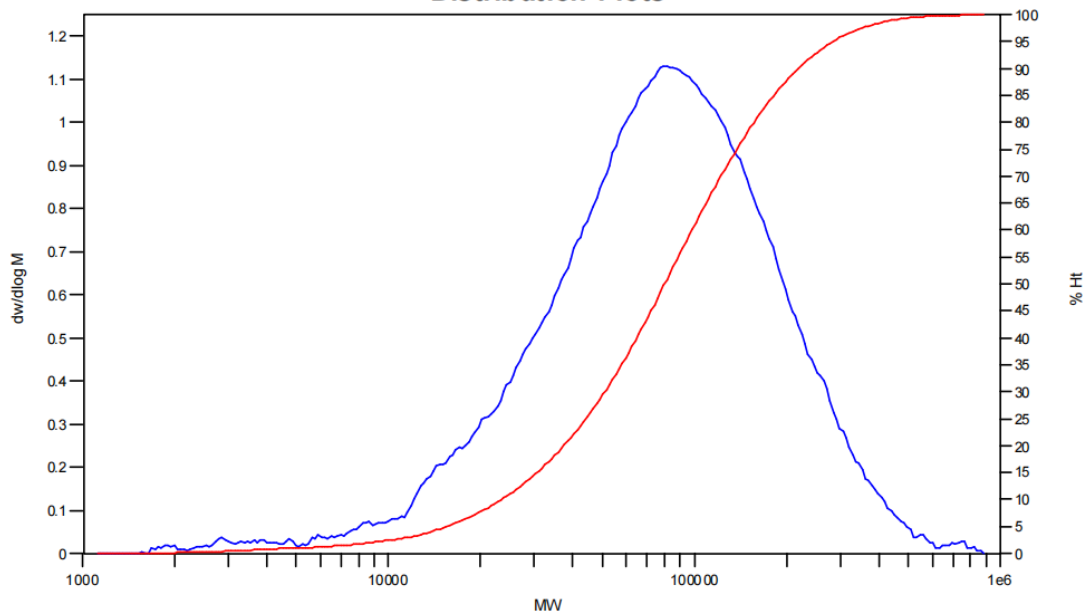

**Figure S55.** GPC curves of obtained polyethylene using **NiBr-Cl** at 60°C temperatures (entry 17, Table 2).

**MW Averages**

Mp: 63986

Mn: 43507

Mv: 76272

Mw: 82440

Mz: 136326

Mz+1: 194426

PD: 1.8949

**Distribution Plots**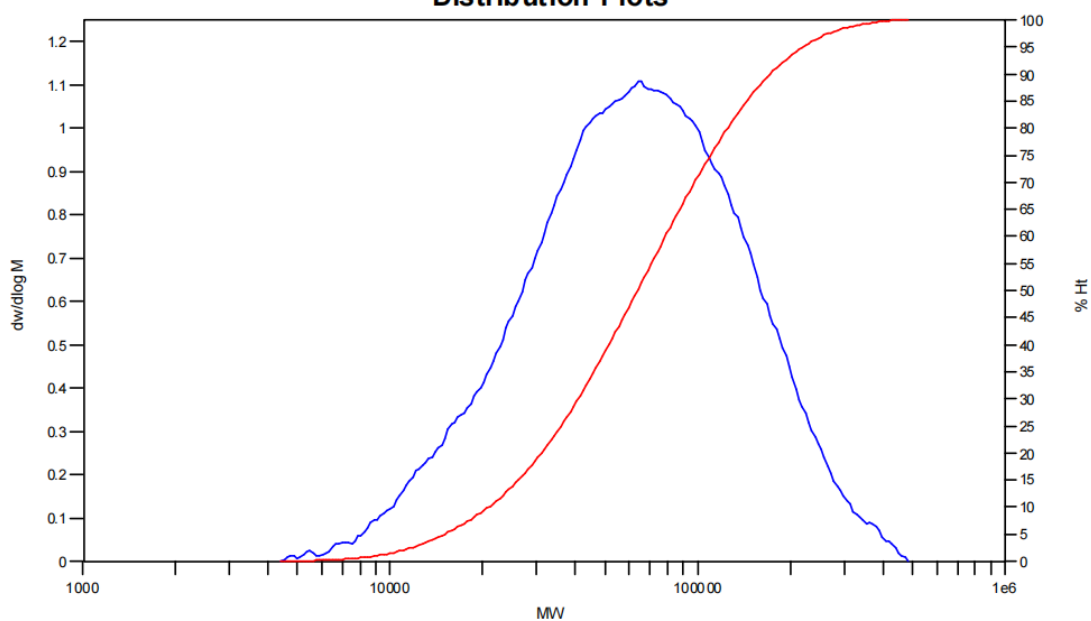

**Figure S56.** GPC curves of obtained polyethylene using **NiBr-Cl** at 80°C temperatures (entry 18, Table 2).

**MW Averages**

Mp: 40625

Mn: 22503

Mv: 40065

Mw: 43221

Mz: 71911

Mz+1: 110712

PD: 1.9207

**Distribution Plots**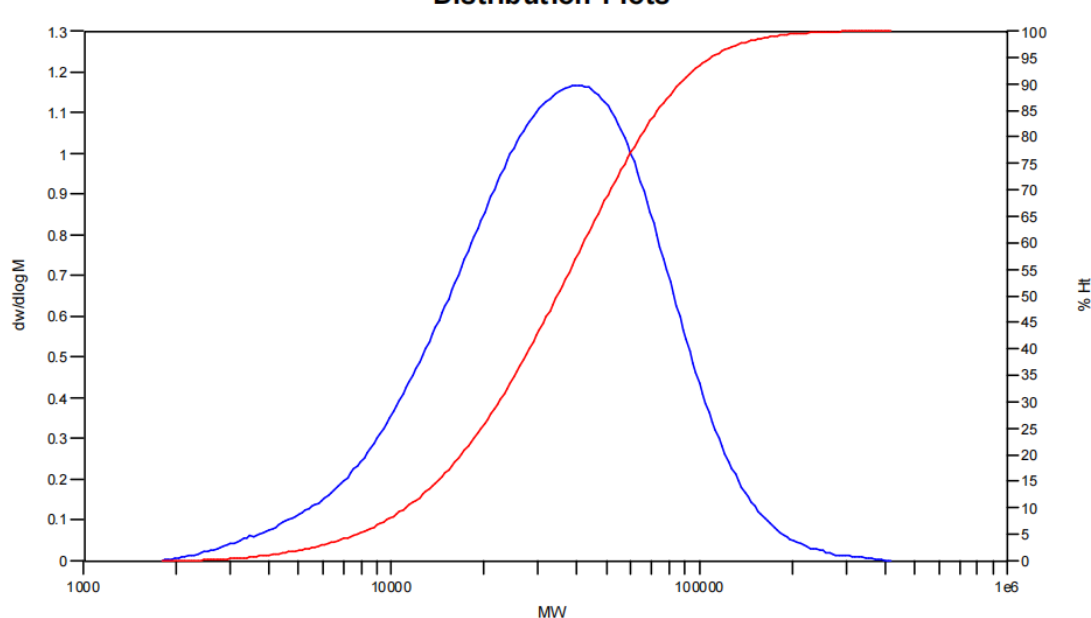

**Figure S57.** GPC curves of obtained polyethylene using **NiBr-Cl** at 100°C temperatures (entry 19, Table 2).

**MW Averages**

Mp: 125620

Mn: 66753

Mv: 140940

Mw: 155013

Mz: 278002

Mz+1: 401282

PD: 2.3222

**Distribution Plots**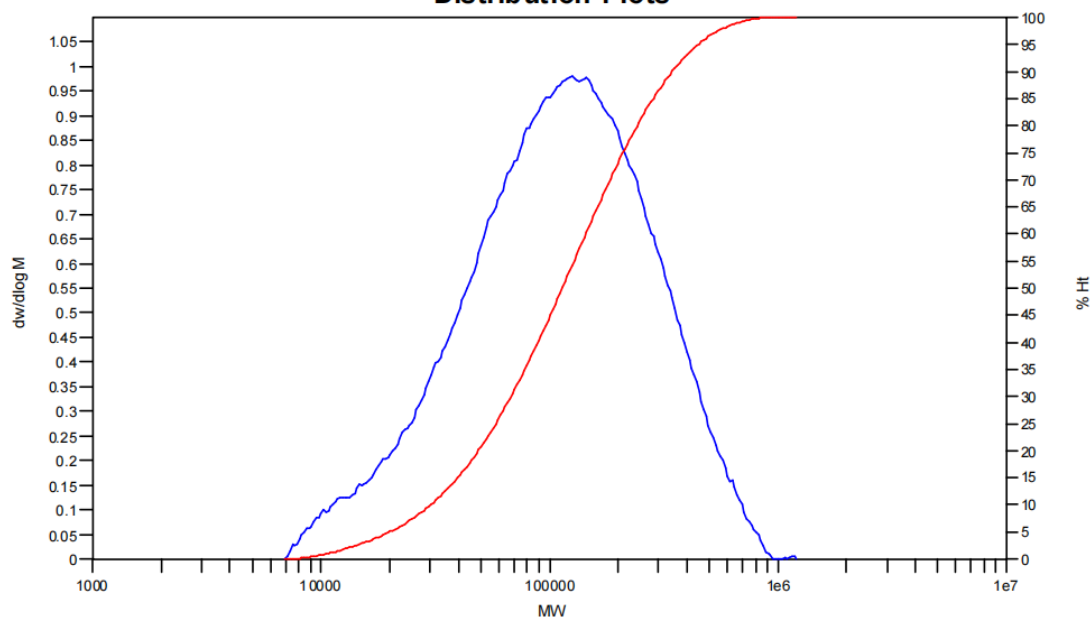

**Figure S58.** GPC curves of obtained polyethylene using **NiBr-iPr<sub>3</sub>** at 40°C temperatures (entry 20, Table 2).

**MW Averages**

Mp: 127553

Mn: 75899

Mv: 134998

Mw: 145051

Mz: 228999

Mz+1: 316650

PD: 1.9111

**Distribution Plots**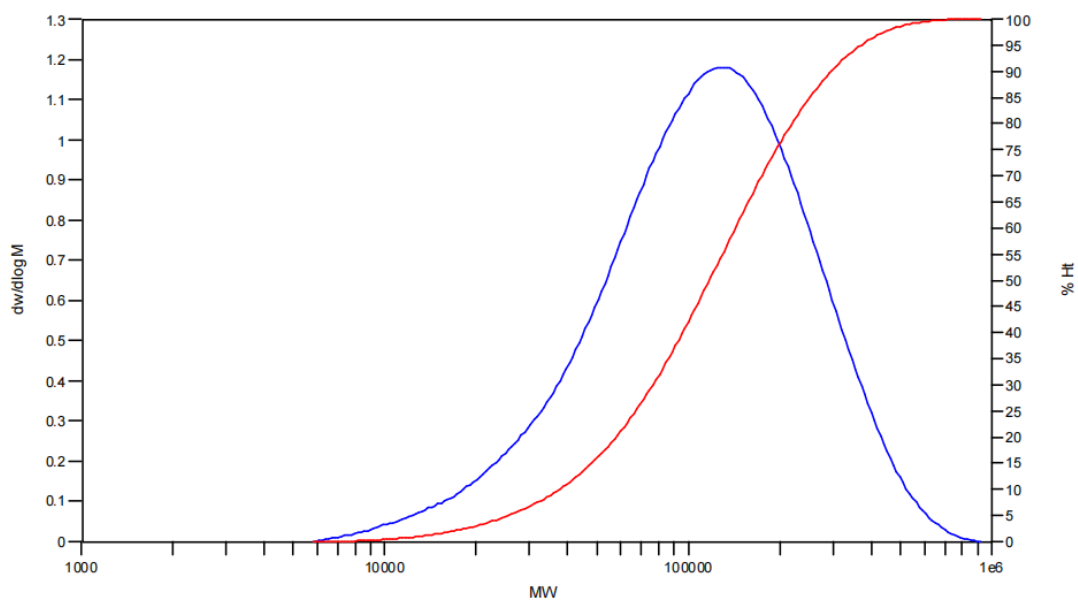

**Figure S59.** GPC curves of obtained polyethylene using **NiBr-iPr<sub>3</sub>** at 60°C temperatures (entry 21, Table 2).

**MW Averages**

Mp: 95241

Mn: 53320

Mv: 114793

Mw: 126394

Mz: 234554

Mz+1: 365155

PD: 2.3705

**Distribution Plots**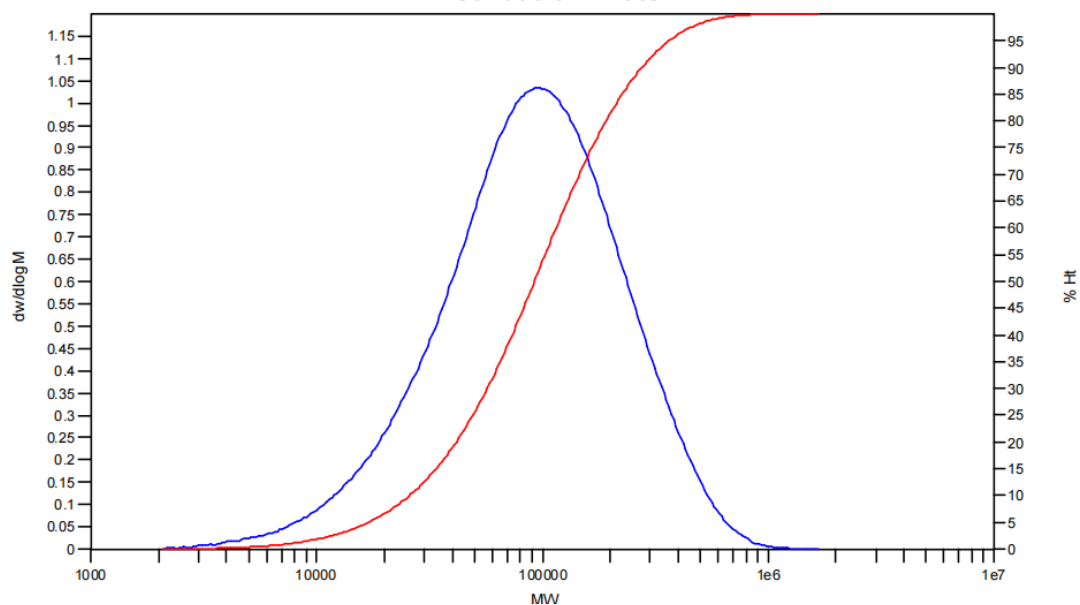

**Figure S60.** GPC curves of obtained polyethylene using  $\text{NiBr}\cdot\text{iPr}_3$  at 80°C temperatures (entry 22, Table 2).

**MW Averages**

Mp: 62964

Mn: 34551

Mv: 61626

Mw: 66402

Mz: 108592

Mz+1: 161173

PD: 1.9219

**Distribution Plots**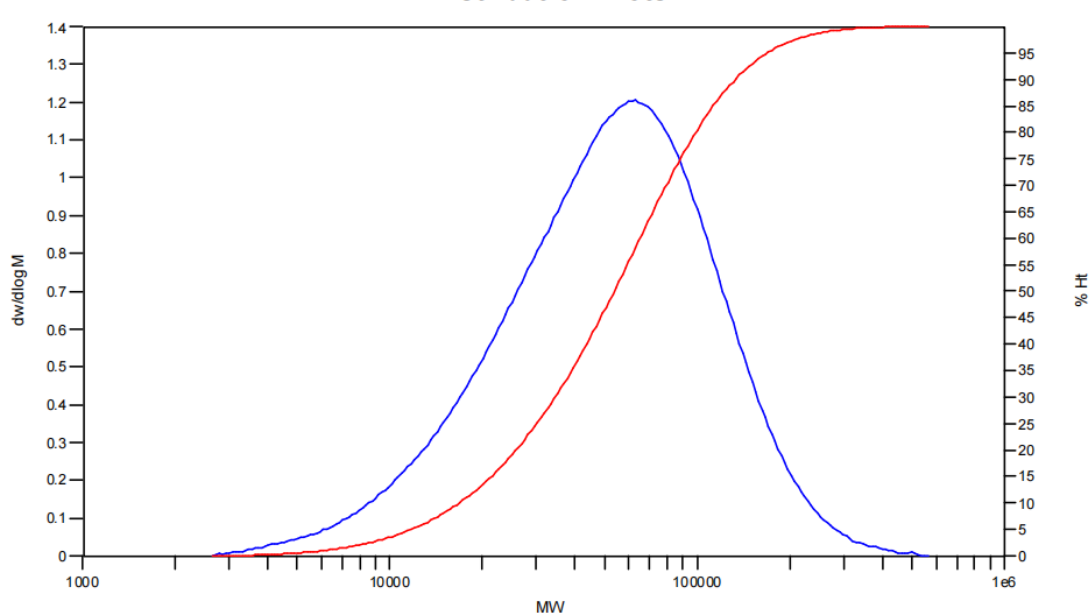

**Figure S61.** GPC curves of obtained polyethylene using  $\text{NiBr}\cdot\text{iPr}_3$  at 100°C temperatures (entry 23, Table 2).

**MW Averages**

Mp: 559486

Mn: 328868

Mv: 623546

Mw: 677844

Mz: 1153453

Mz+1: 1669657

PD: 2.0611

**Distribution Plots**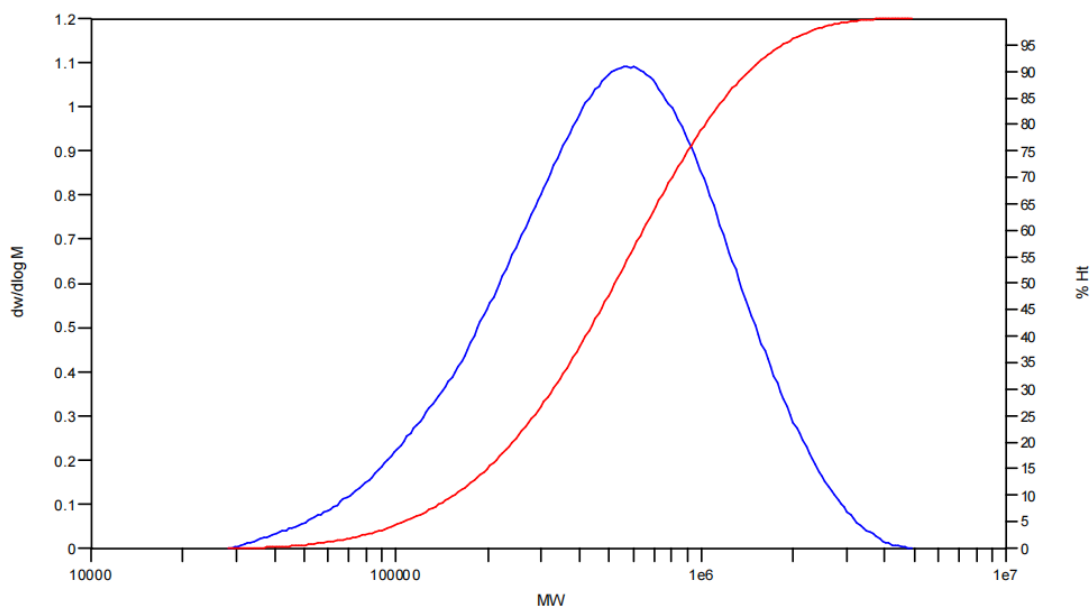

**Figure S62.** GPC curves of obtained polyethylene using **NiCl-iPr** at 40°C temperatures (entry 24, Table 2).

**MW Averages**

Mp: 439699

Mn: 196000

Mv: 471350

Mw: 521485

Mz: 986568

Mz+1: 1567132

PD: 2.6606

**Distribution Plots**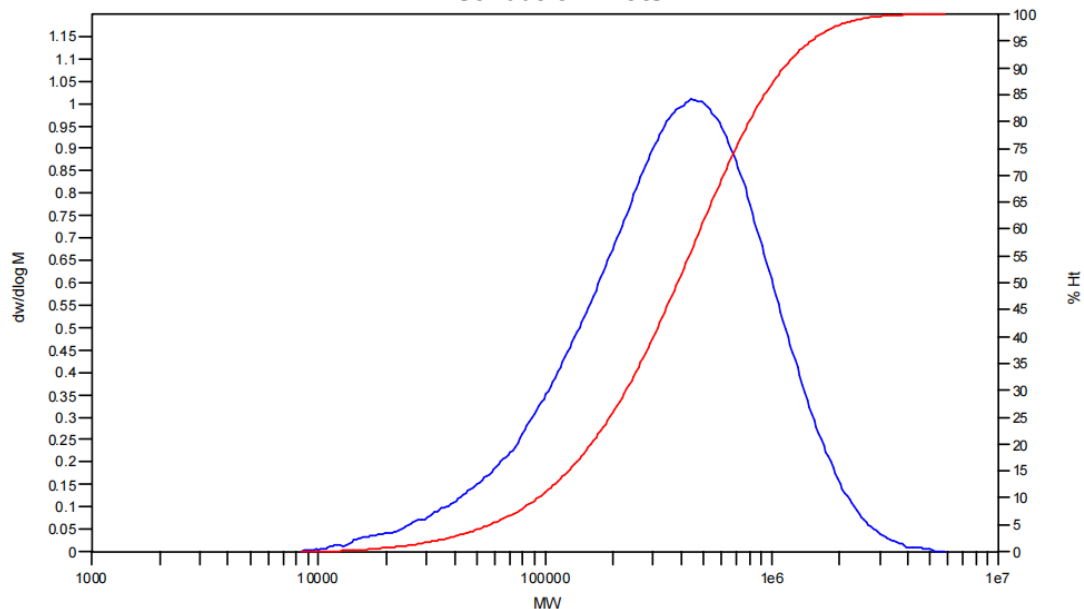

**Figure S63.** GPC curves of obtained polyethylene using **NiCl-Et** at 40°C temperatures (entry 25, Table 2).

**MW Averages**

Mp: 508084

Mn: 313014

Mv: 509926

Mw: 543837

Mz: 817796

Mz+1: 1080575

PD: 1.7374

**Distribution Plots**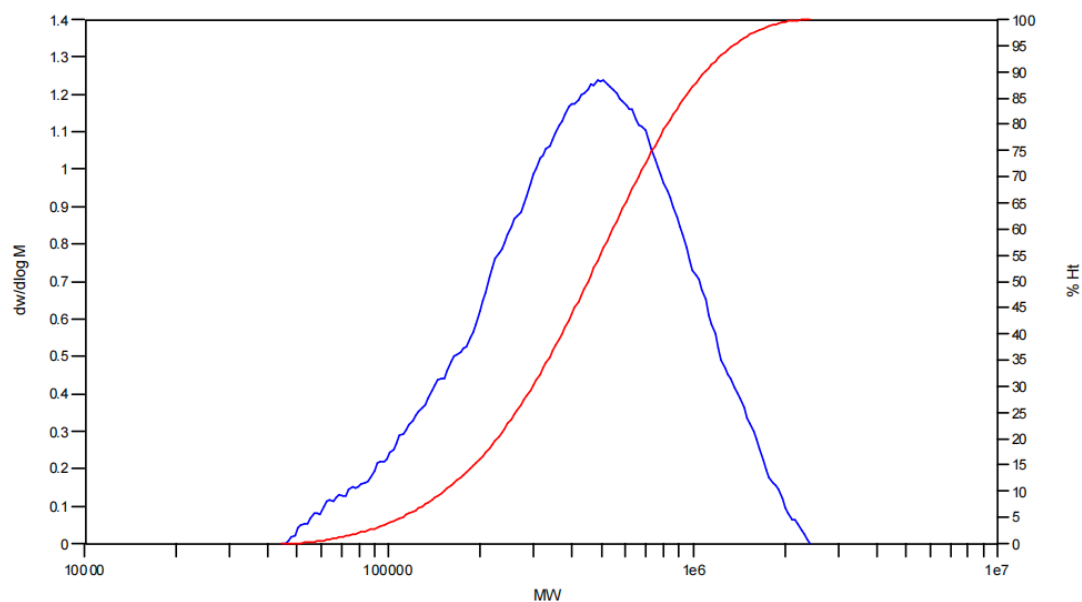

**Figure S64.** GPC curves of obtained polyethylene using **NiCl-Me** at 40°C temperatures (entry 26, Table 2).

**MW Averages**

Mp: 154978

Mn: 80064

Mv: 157496

Mw: 170083

Mz: 277610

Mz+1: 404163

PD: 2.1243

**Distribution Plots**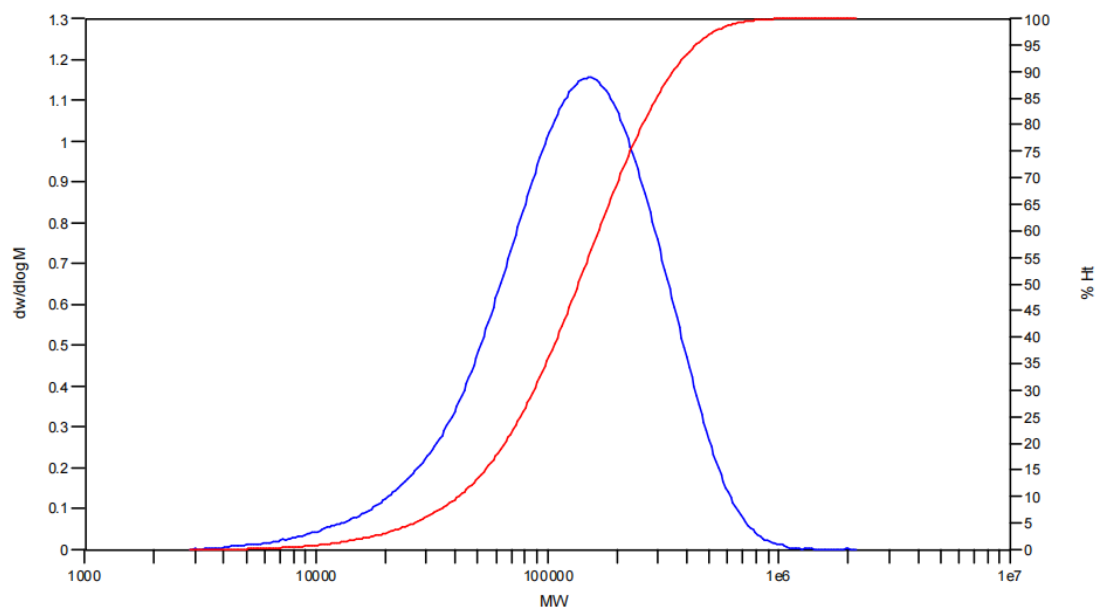

**Figure S65.** GPC curves of obtained polyethylene using **NiCl-Cl** at 40°C temperatures (entry 27, Table 2).

## 10. DSC curves of polyethylene using different catalyst at different temperatures

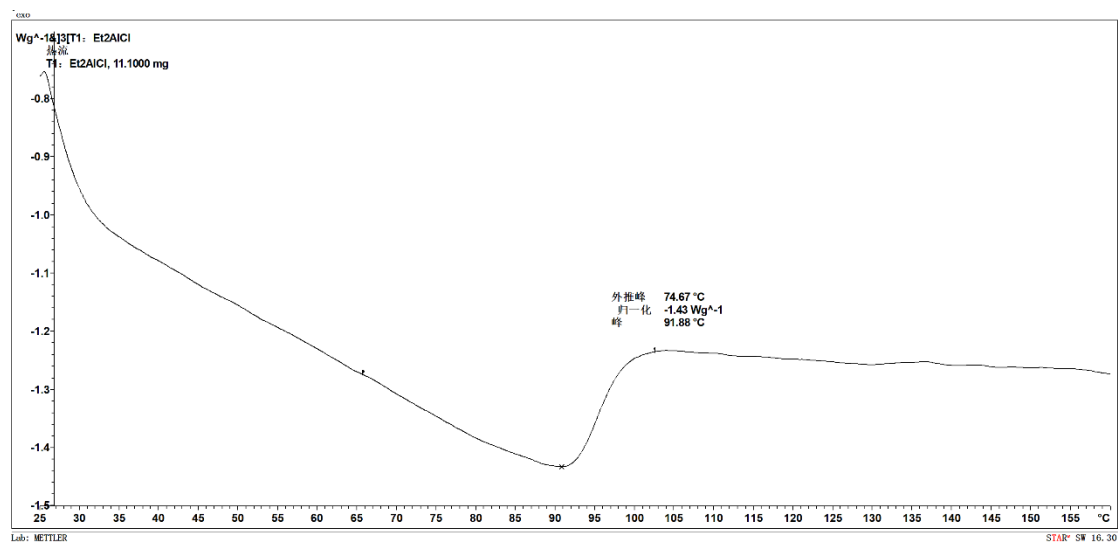

**Figure S66.** DSC curve of obtained polyethylene using **NiBr-iPr** at 30 °C showing  $T_m$  (entry 1, Table 2).

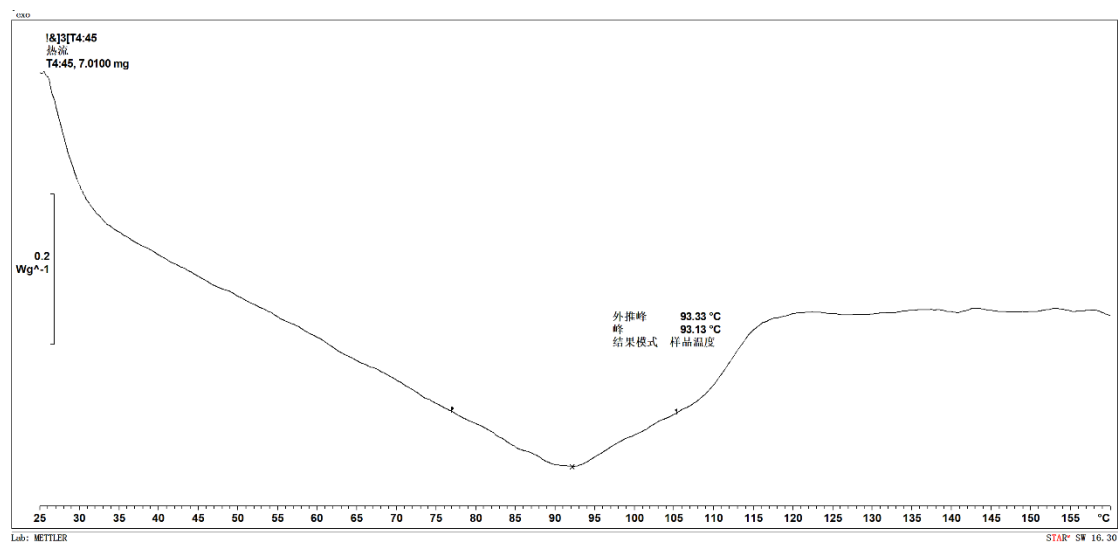

**Figure S67.** DSC curve of obtained polyethylene using **NiBr-iPr** at 50 °C showing  $T_m$  (entry 3, Table 2).



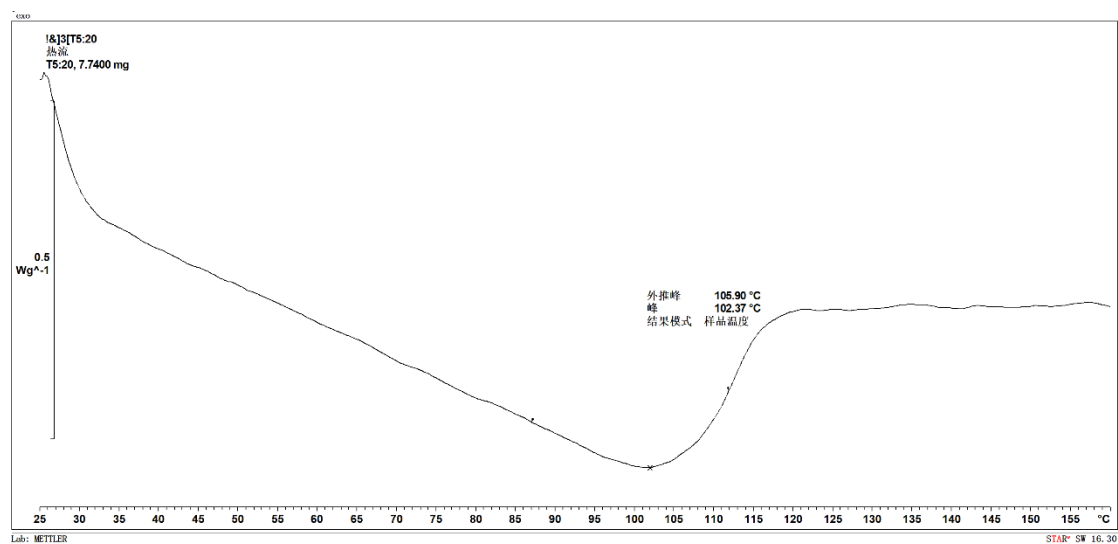

**Figure S68.** DSC curve of obtained polyethylene using **NiBr-Et** at 40 °C showing  $T_m$  (entry 8, Table 2).

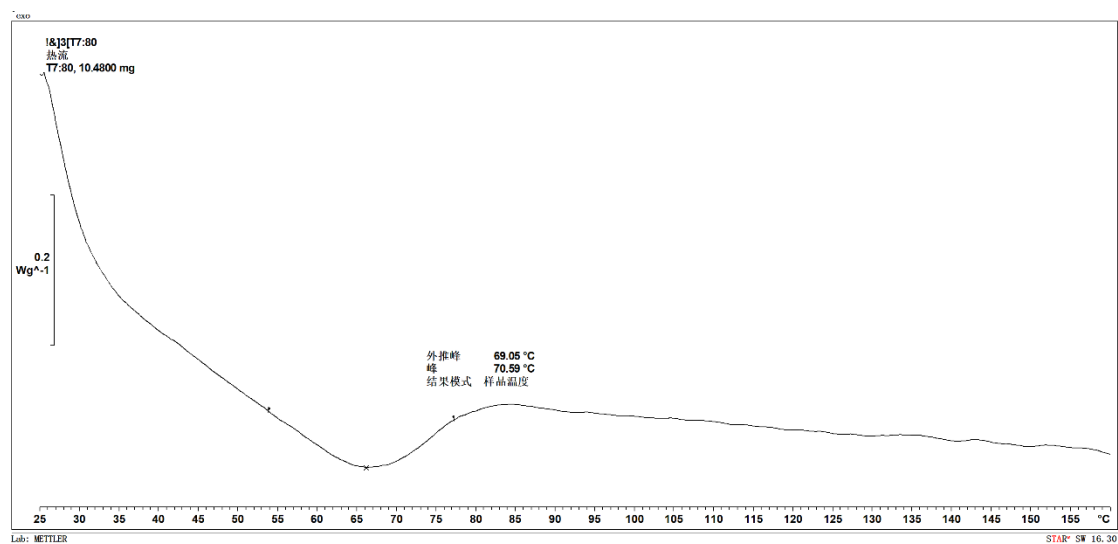

**Figure S69.** DSC curve of obtained polyethylene using **NiBr-Et** at 80 °C showing  $T_m$  (entry 10, Table 2).

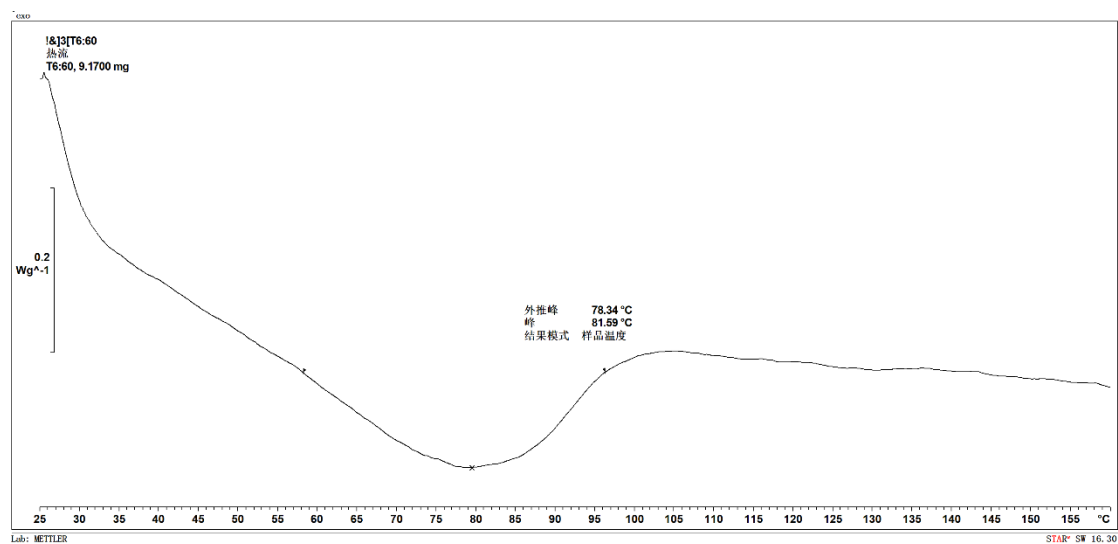

**Figure S70.** DSC curve of obtained polyethylene using **NiBr-Me** at 60 °C showing  $T_m$  (entry 13, Table 2).

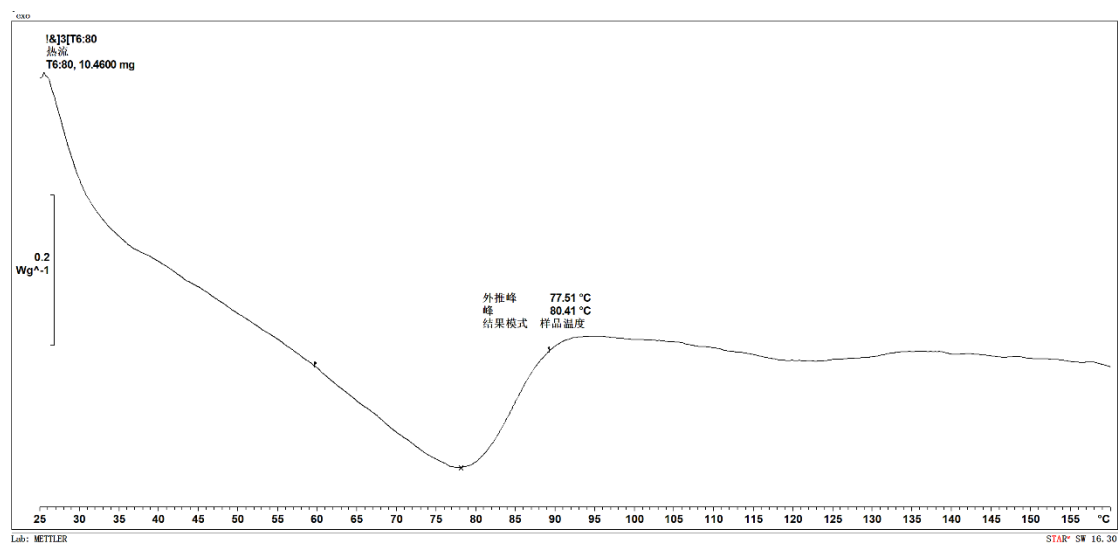

**Figure S71.** DSC curve of obtained polyethylene using **NiBr-Me** at 80 °C showing  $T_m$  (entry 14, Table 2).

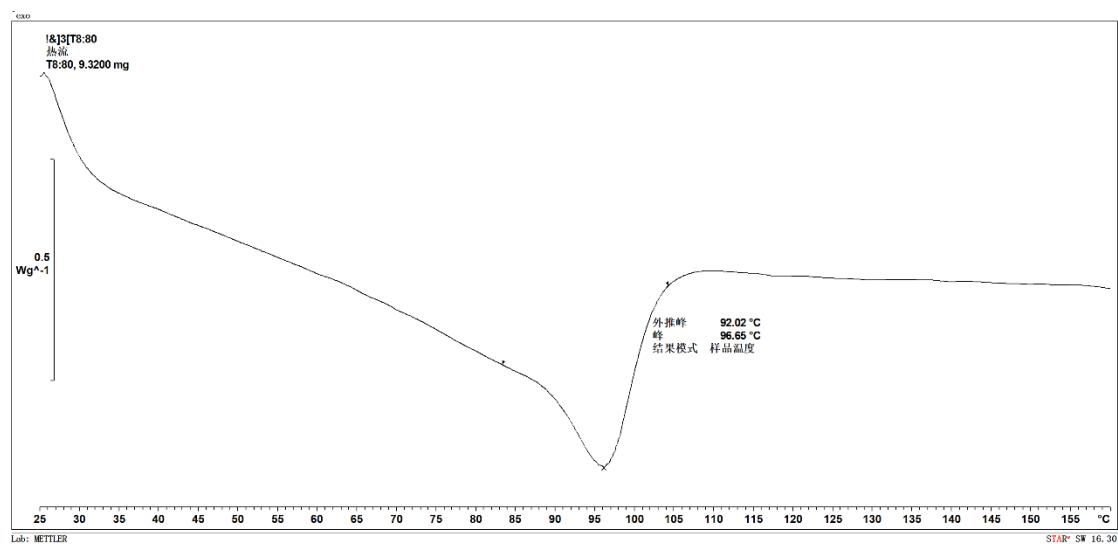

**Figure S72.** DSC curve of obtained polyethylene using **NiBr-Cl** at 80 °C showing  $T_m$  (entry 18, Table 2).

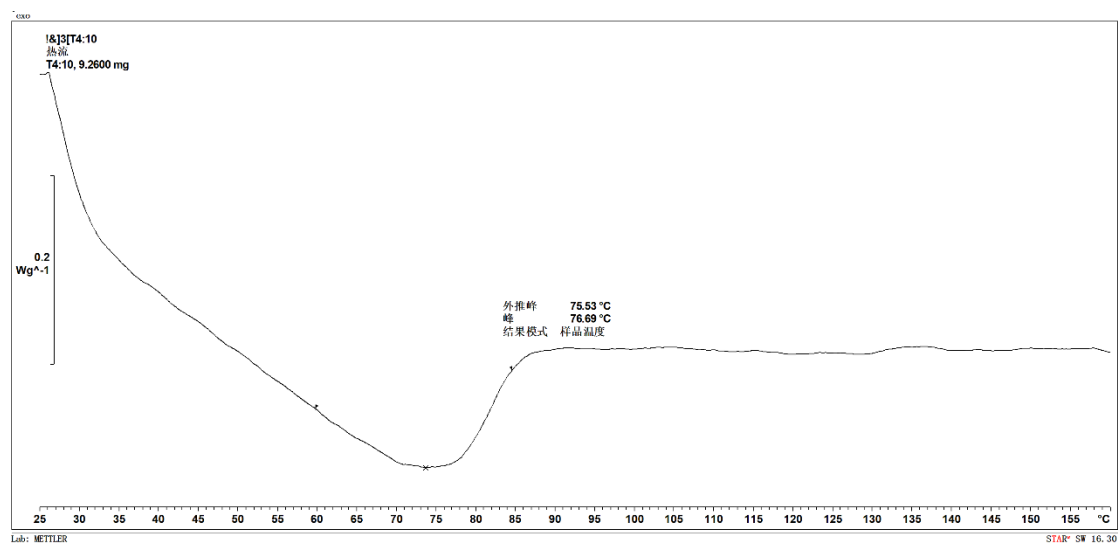

**Figure S73.** DSC curve of obtained polyethylene using **NiBr-Cl** at 100 °C showing  $T_m$  (entry 19, Table 2).

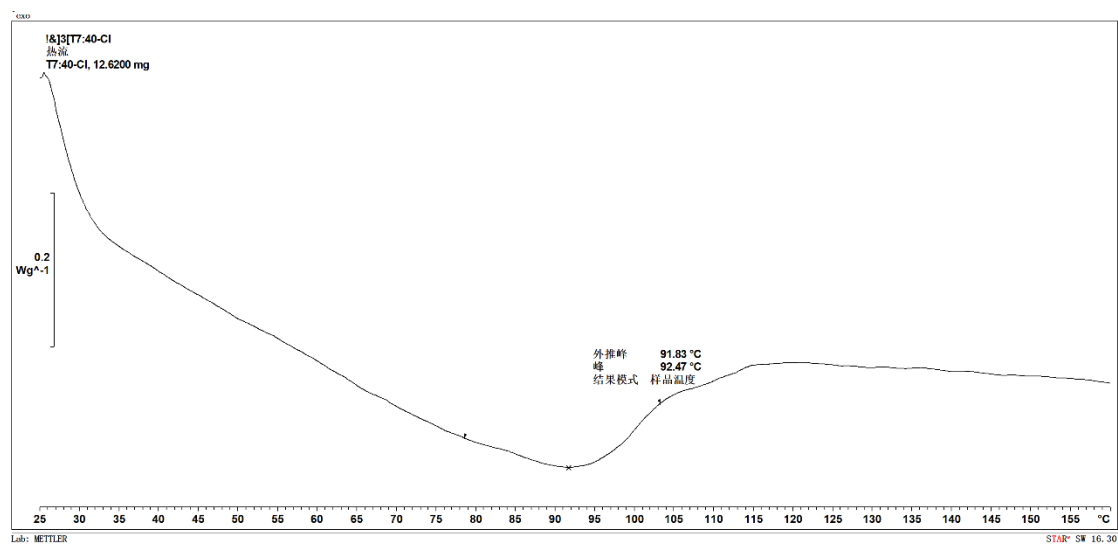

**Figure S74.** DSC curve of obtained polyethylene using **NiCl-Et** at 40 °C showing  $T_m$  (entry 25, Table 2).

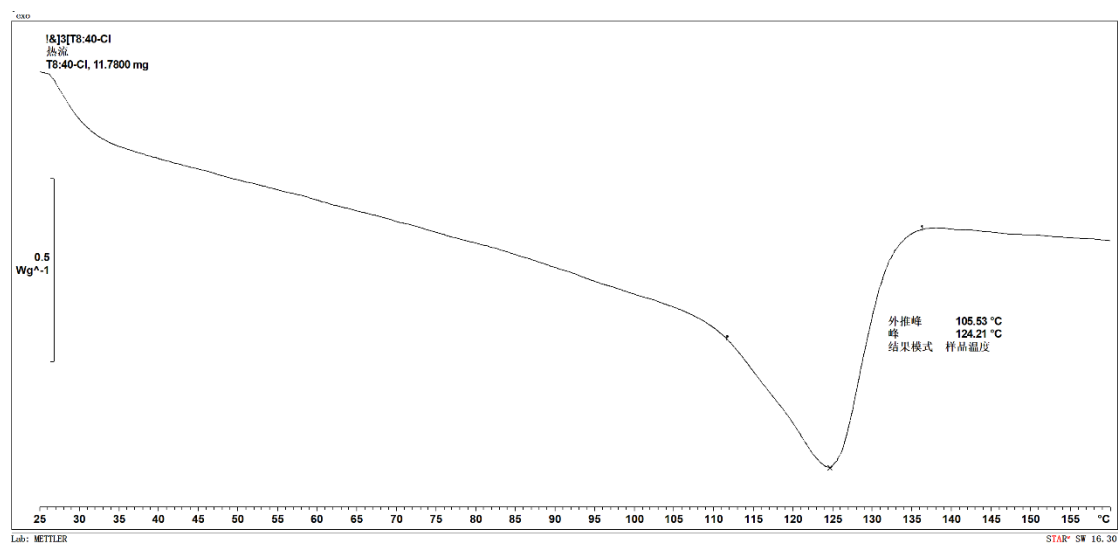

**Figure S75.** DSC curve of obtained polyethylene using **NiCl-Cl** at 40°C showing  $T_m$  (entry 27, Table 2).

## 11. Wide-angle X-ray diffraction (WAXD) spectra of the polyethylene

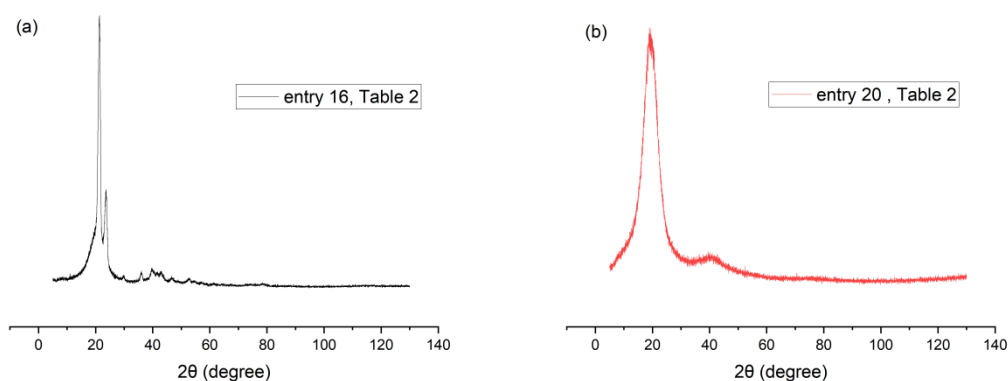

**Figure S76.** Wide-angle X-ray diffraction (WAXD) spectra of the polyethylene produced by (a) NiBr-Cl (entry 16, Table 2) and (b) NiBr-iPr3 (entry 20, Table 2).

## 12. ESI-MS spectra of ligands, and their nickel complexes

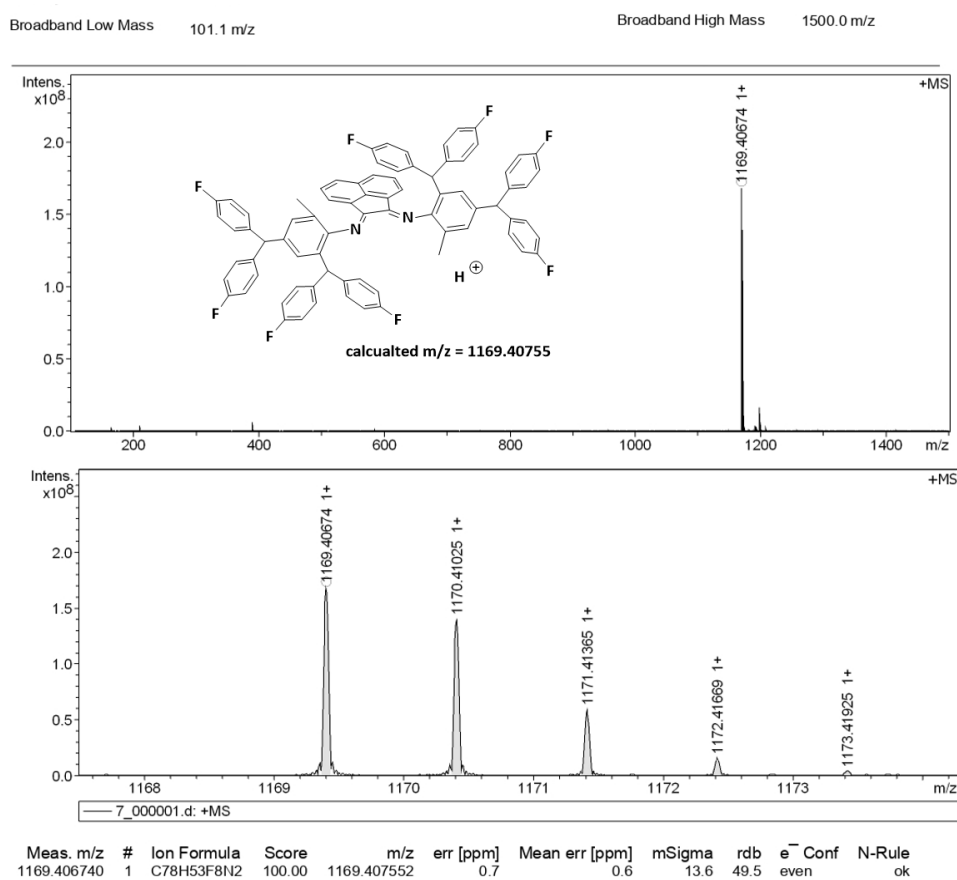

**Figure S77.** ESI-MS spectrum of L-Me

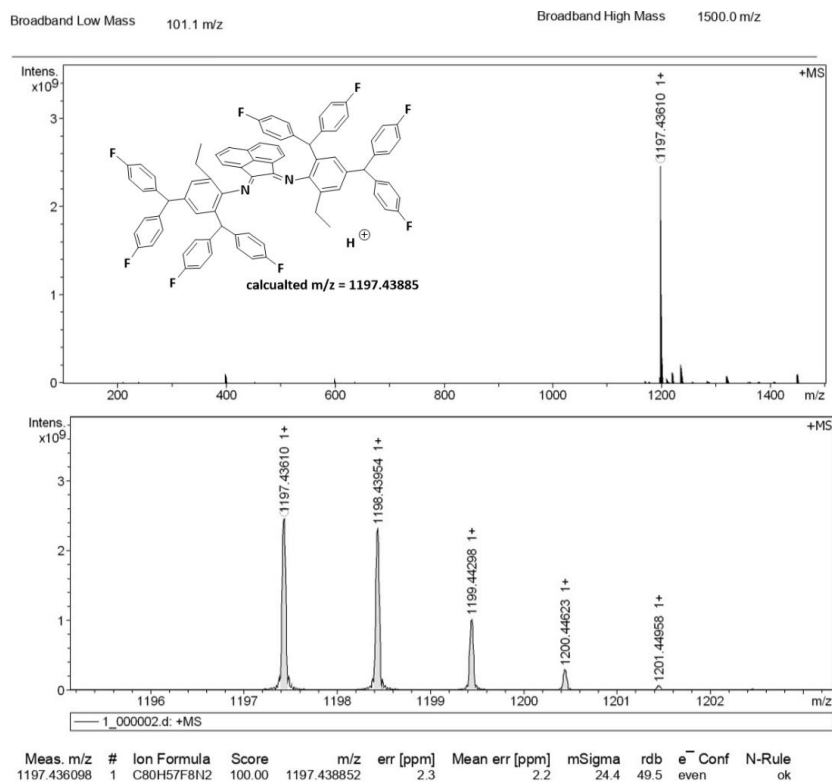

**Figure S78.** ESI-MS spectrum of L-Et

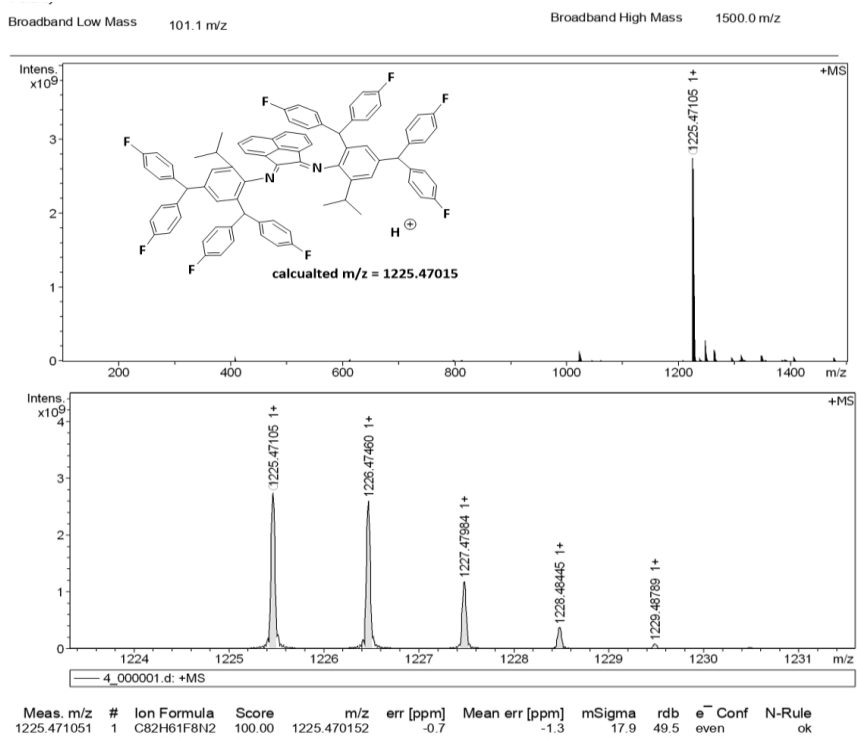

**Figure S79.** ESI-MS spectrum of L-iPr

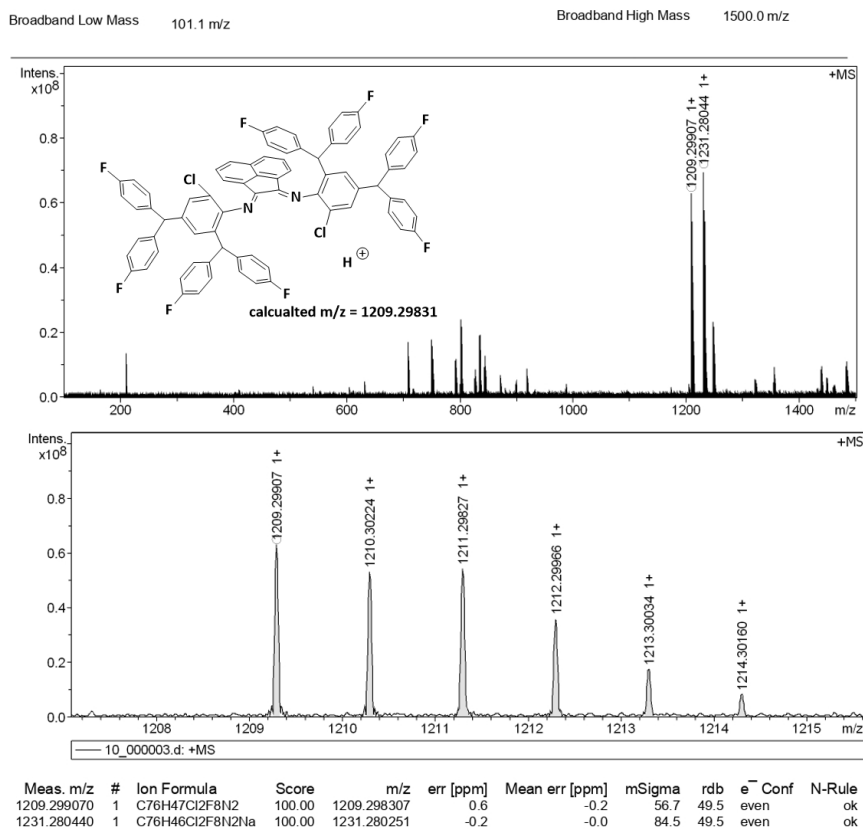

Figure S80. ESI-MS spectrum of L-Cl

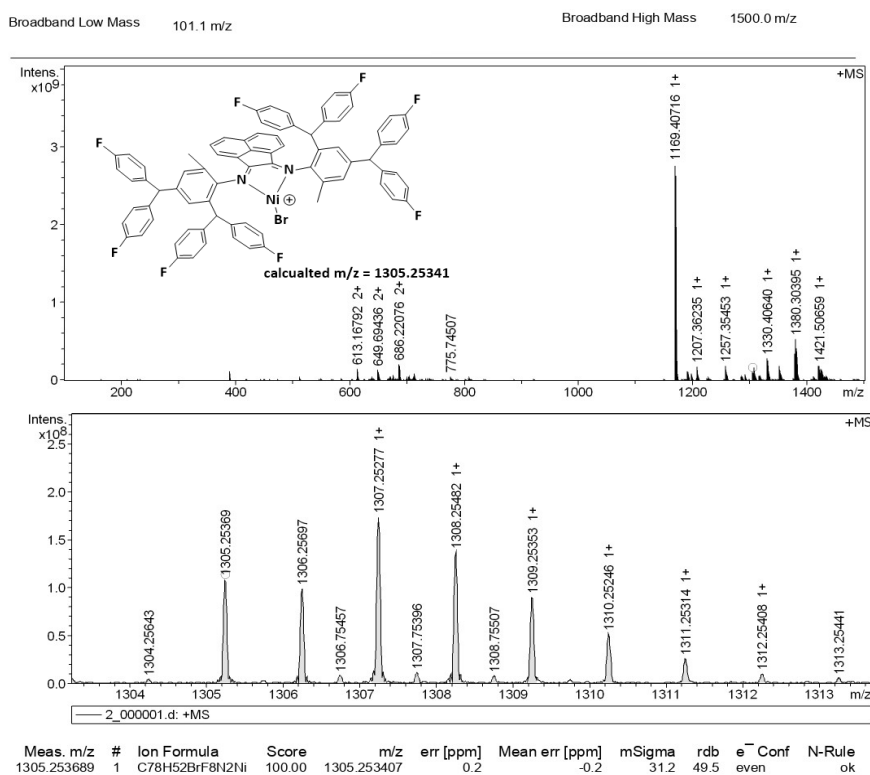

Figure S81. ESI-MS spectrum of NiBr-Me

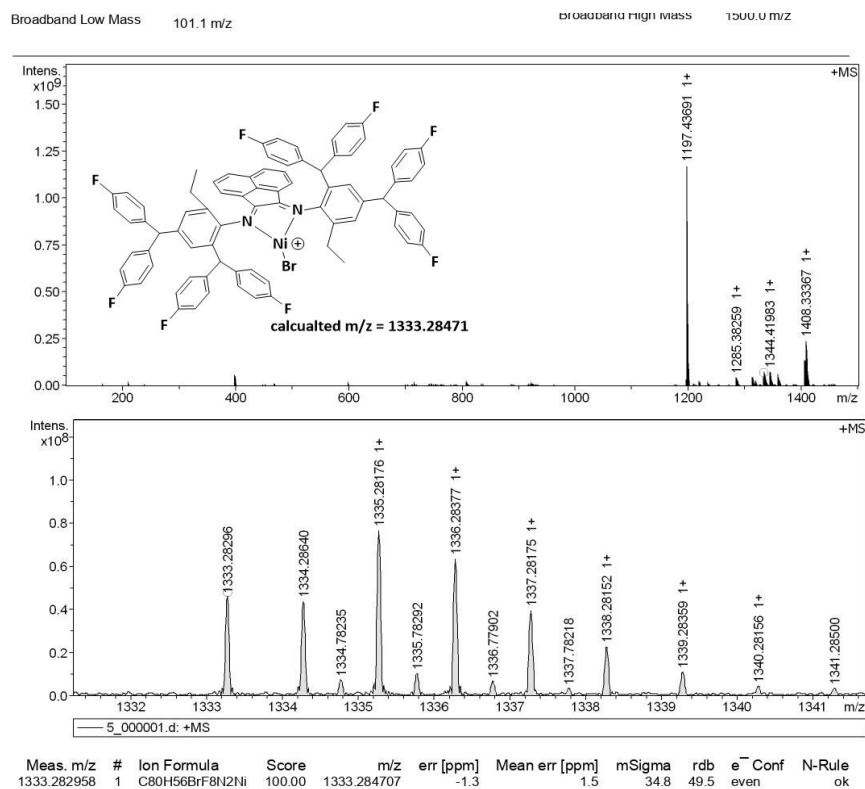

**Figure S82.** ESI-MS spectrum of NiBr-Et

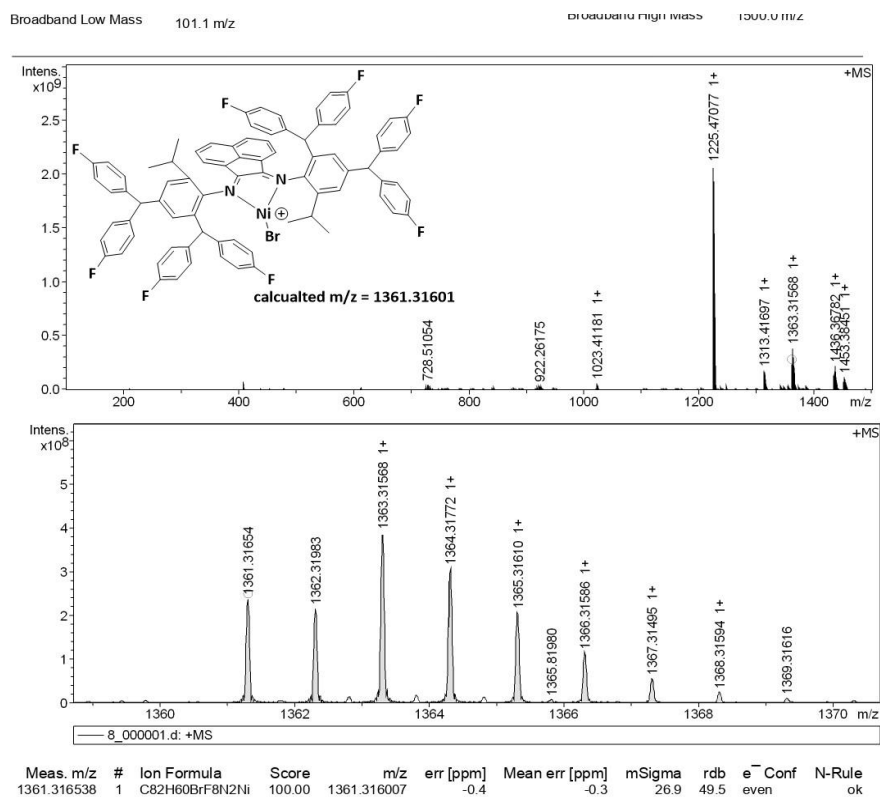

**Figure S83.** ESI-MS spectrum of NiBr-iPr



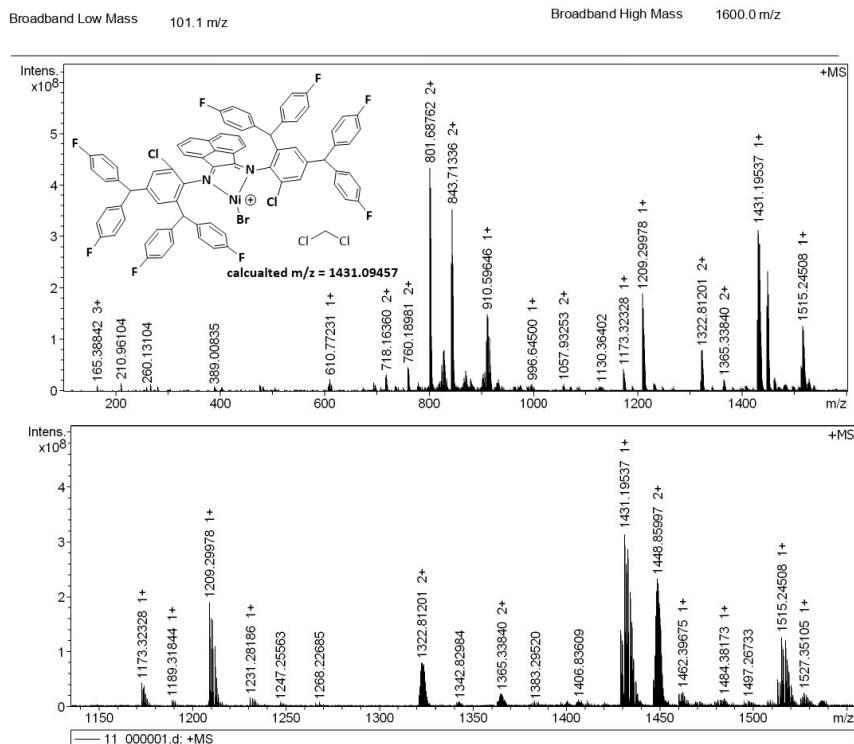

Figure S84. ESI-MS spectrum of NiBr-Cl

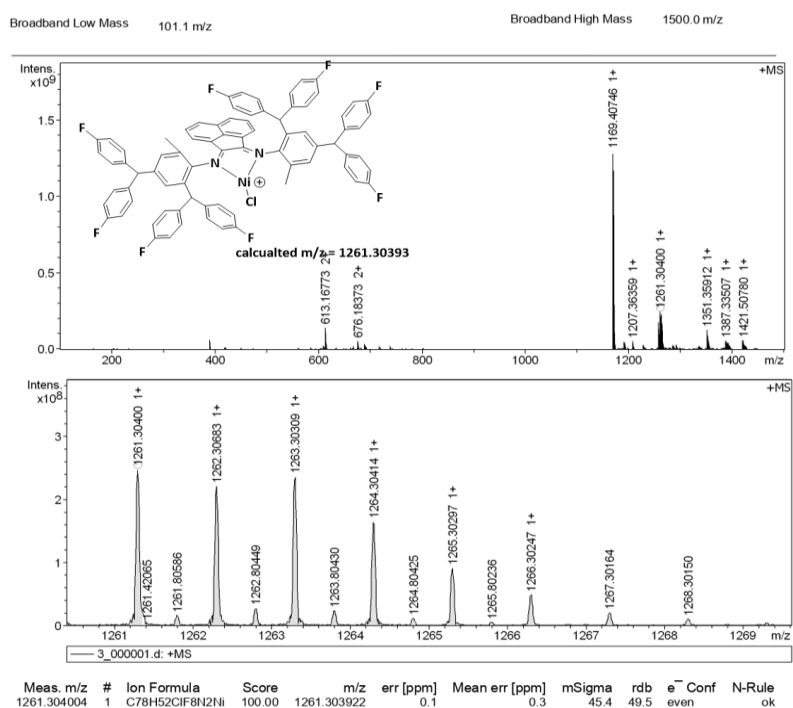

Figure S85. ESI-MS spectrum of NiCl-Me

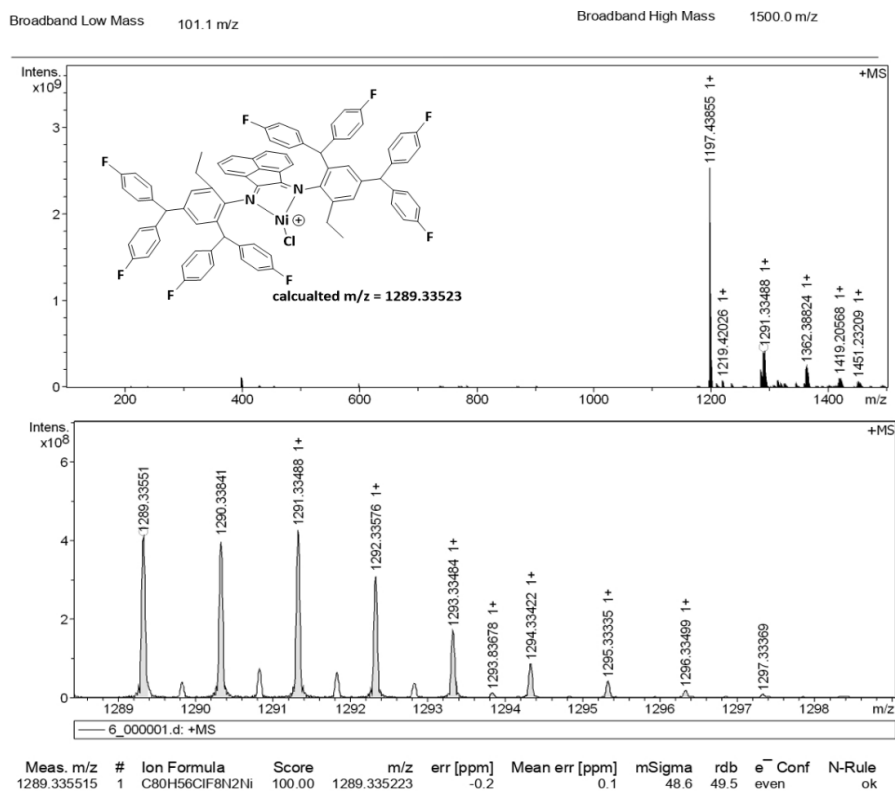

Figure S86. ESI-MS spectrum of NiCl-Et

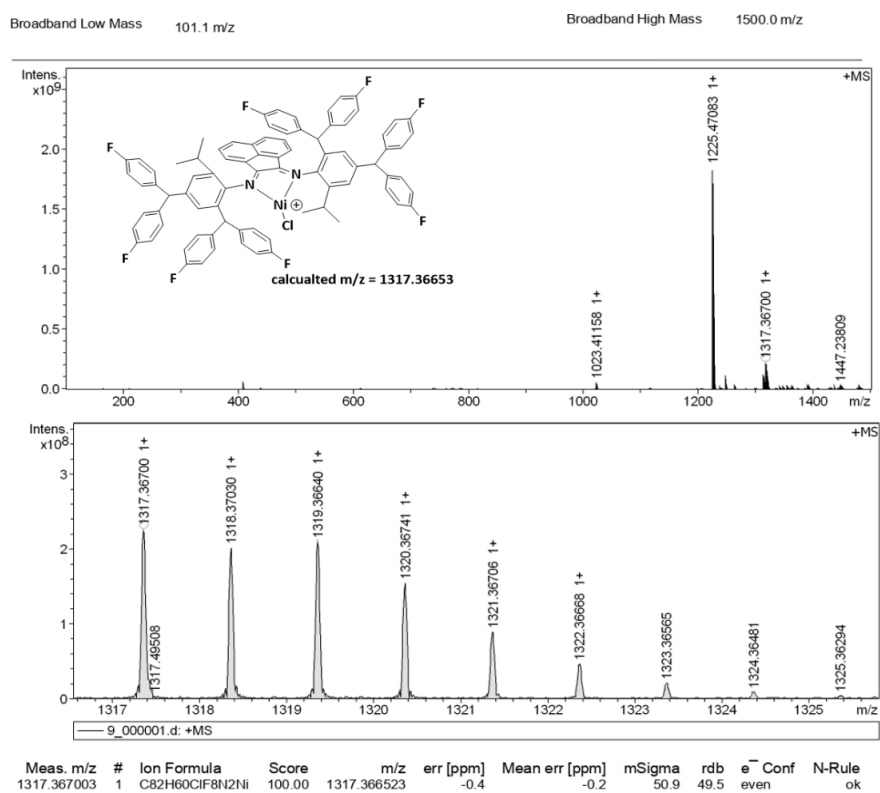

Figure S87. ESI-MS spectrum of NiCl-iPr

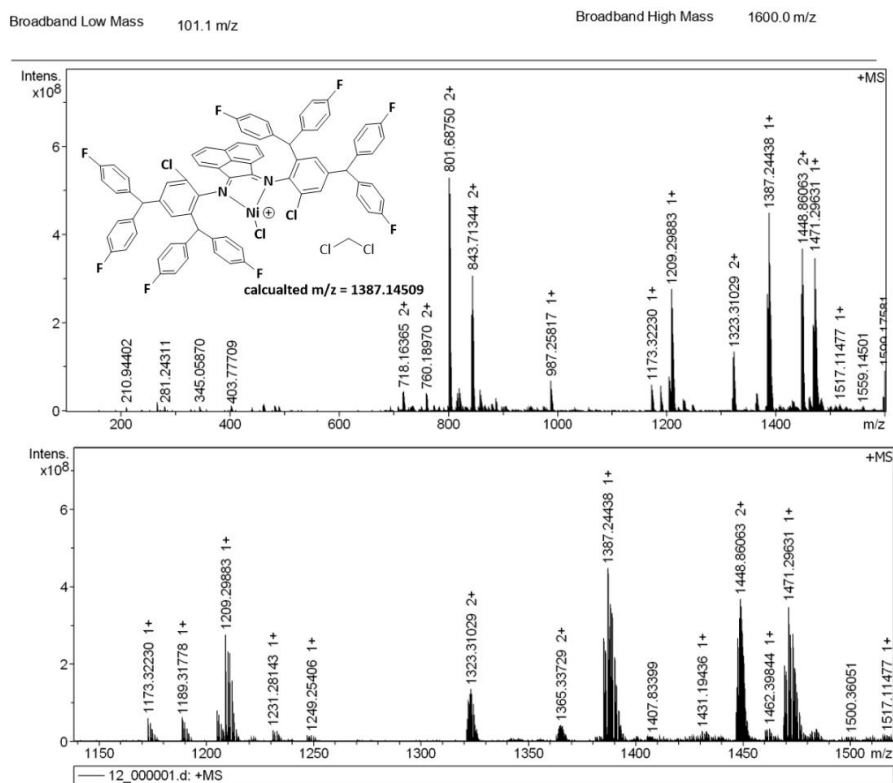

**Figure S88.** ESI-MS spectrum of NiCl-Cl

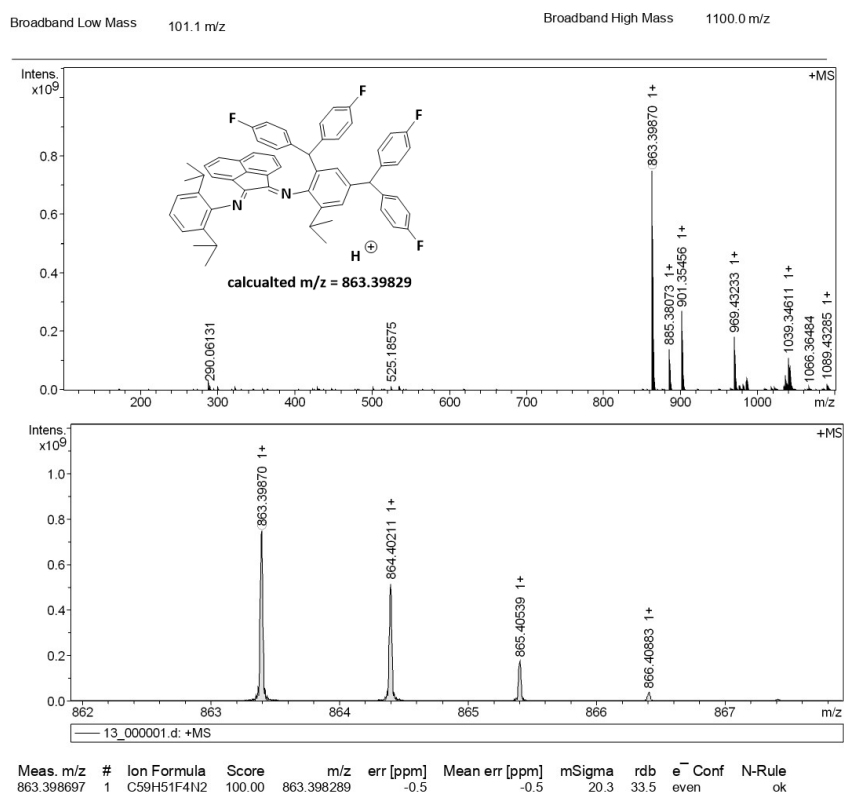

**Figure S89.** ESI-MS spectrum of L-iPr<sub>3</sub>

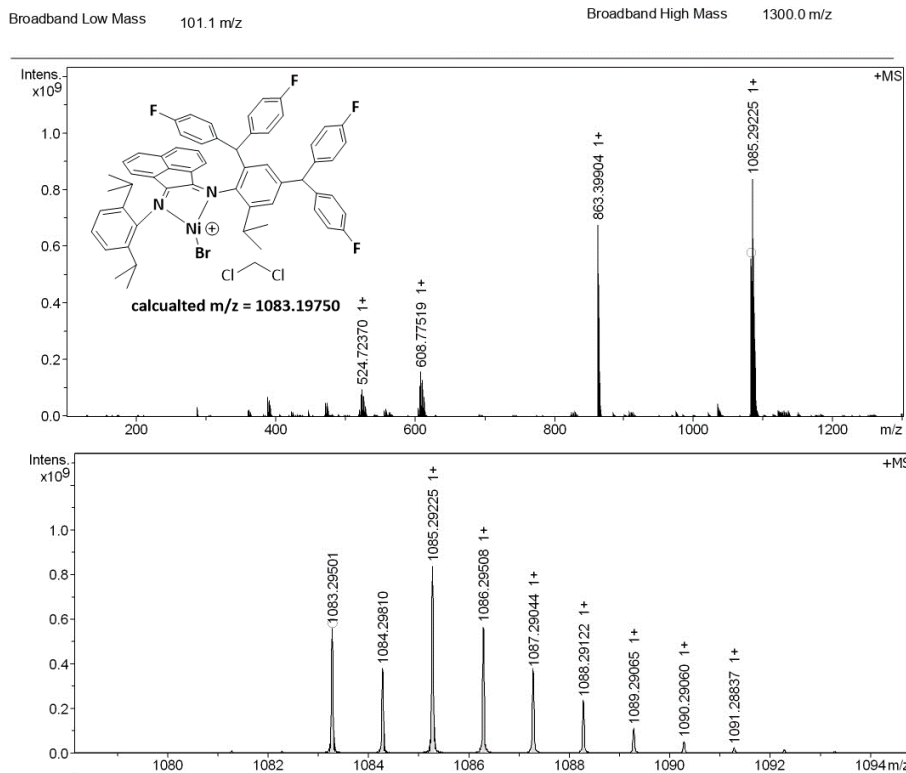

**Figure S90.** ESI-MS spectrum of NiBr-*i*Pr<sub>3</sub>

### 13. References

- [1] Q. Muhammad, C. Tan and C. Chen, Concerted steric and electronic effects on  $\alpha$ -diimine nickel- and palladium-catalyzed ethylene polymerization and copolymerization, *Sci. Bull.* 65 (2020) 300-307.
- [2] G. M.; Sheldrick, SHELXTL-97, Program for the Refinement of Crystal Structures, University of Göttingen, Göttingen, Germany (1997).
